# Supplementary material for: Comparative Transcriptome Profiling Reveals Coding and Noncoding RNA Differences in NSCLC from African Americans and European Americans
Source: Oxford University Press journal article supplement (doi:10.1158/1078-0432.ccr-17-0527), 2017-11-30
Supplement: 10780432ccr170527-sup-179431_2_supp_4229698_kv4sk3.xlsx [file 10780432ccr170527-sup-179431_2_supp_4229698_kv4sk3.xlsx]

## Sheet: ST1
Supplementary Table 1: C2 Molecular Signature Database pathway enrichment in lung tumors from AA and EA
Enriched in AA lung tumors n=91	Enriched in both AA and EA lung tumors n=90	Enriched in EA lung tumors n=544
TURASHVILI_BREAST_LOBULAR_CARCINOMA_VS_DUCTAL_NORMAL_UP	DODD_NASOPHARYNGEAL_CARCINOMA_DN	MARSON_BOUND_BY_E2F4_UNSTIMULATED
ANASTASSIOU_CANCER_MESENCHYMAL_TRANSITION_SIGNATURE	CUI_TCF21_TARGETS_2_UP	SOTIRIOU_BREAST_CANCER_GRADE_1_VS_3_UP
BOQUEST_STEM_CELL_UP	CAIRO_HEPATOBLASTOMA_CLASSES_UP	SHEDDEN_LUNG_CANCER_POOR_SURVIVAL_A6
NABA_CORE_MATRISOME	MARTINEZ_RB1_AND_TP53_TARGETS_DN	DUTERTRE_ESTRADIOL_RESPONSE_24HR_UP
LINDGREN_BLADDER_CANCER_CLUSTER_2B	DOUGLAS_BMI1_TARGETS_UP	CHIANG_LIVER_CANCER_SUBCLASS_PROLIFERATION_UP
NABA_MATRISOME	SENGUPTA_NASOPHARYNGEAL_CARCINOMA_UP	ROSTY_CERVICAL_CANCER_PROLIFERATION_CLUSTER
HOSHIDA_LIVER_CANCER_SUBCLASS_S1	MANALO_HYPOXIA_DN	KOBAYASHI_EGFR_SIGNALING_24HR_DN
CREIGHTON_ENDOCRINE_THERAPY_RESISTANCE_1	PATIL_LIVER_CANCER	FUJII_YBX1_TARGETS_DN
VECCHI_GASTRIC_CANCER_ADVANCED_VS_EARLY_UP	KINSEY_TARGETS_OF_EWSR1_FLII_FUSION_UP	LINDGREN_BLADDER_CANCER_CLUSTER_3_UP
MARTENS_TRETINOIN_RESPONSE_UP	MCCABE_BOUND_BY_HOXC6	REACTOME_CELL_CYCLE
RODWELL_AGING_KIDNEY_UP	MARSON_BOUND_BY_FOXP3_STIMULATED	SARRIO_EPITHELIAL_MESENCHYMAL_TRANSITION_UP
PICCALUGA_ANGIOIMMUNOBLASTIC_LYMPHOMA_UP	BRUINS_UVC_RESPONSE_LATE	REACTOME_CELL_CYCLE_MITOTIC
NABA_ECM_GLYCOPROTEINS	LEE_BMP2_TARGETS_UP	HORIUCHI_WTAP_TARGETS_DN
SCHUETZ_BREAST_CANCER_DUCTAL_INVASIVE_UP	VANTVEER_BREAST_CANCER_ESR1_DN	WHITEFORD_PEDIATRIC_CANCER_MARKERS
BILD_MYC_ONCOGENIC_SIGNATURE	PEDERSEN_METASTASIS_BY_ERBB2_ISOFORM_7	ODONNELL_TFRC_TARGETS_DN
SABATES_COLORECTAL_ADENOMA_DN	RODRIGUES_THYROID_CARCINOMA_POORLY_DIFFERENTIATED_UP	CHANG_CYCLING_GENES
HSIAO_HOUSEKEEPING_GENES	MARKEY_RB1_ACUTE_LOF_UP	ZHANG_TLX_TARGETS_36HR_DN
NABA_SECRETED_FACTORS	PENG_GLUTAMINE_DEPRIVATION_DN	BENPORATH_ES_1
KIM_ALL_DISORDERS_OLIGODENDROCYTE_NUMBER_CORR_UP	CHEN_METABOLIC_SYNDROM_NETWORK	PUJANA_BRCA2_PCC_NETWORK
VART_KSHV_INFECTION_ANGIOGENIC_MARKERS_UP	GRAESSMANN_RESPONSE_TO_MC_AND_DOXORUBICIN_DN	ZHANG_TLX_TARGETS_60HR_DN
MARTINEZ_RB1_TARGETS_DN	MARTORIATI_MDM4_TARGETS_NEUROEPITHELIUM_UP	WONG_EMBRYONIC_STEM_CELL_CORE
CAIRO_LIVER_DEVELOPMENT_UP	MIYAGAWA_TARGETS_OF_EWSR1_ETS_FUSIONS_DN	VANTVEER_BREAST_CANCER_METASTASIS_DN
REN_ALVEOLAR_RHABDOMYOSARCOMA_DN	MILI_PSEUDOPODIA_CHEMOTAXIS_DN	HOFFMANN_LARGE_TO_SMALL_PRE_BII_LYMPHOCYTE_UP
SENESE_HDAC1_AND_HDAC2_TARGETS_DN	STARK_PREFRONTAL_CORTEX_22Q11_DELETION_DN	SMID_BREAST_CANCER_ERBB2_UP
BENPORATH_PRC2_TARGETS	JOHNSTONE_PARVB_TARGETS_3_DN	KONG_E2F3_TARGETS
PURBEY_TARGETS_OF_CTBP1_NOT_SATB1_DN	KRIGE_RESPONSE_TO_TOSEDOSTAT_6HR_DN	POOLA_INVASIVE_BREAST_CANCER_UP
KIM_BIPOLAR_DISORDER_OLIGODENDROCYTE_DENSITY_CORR_UP	KAN_RESPONSE_TO_ARSENIC_TRIOXIDE	ZHENG_GLIOBLASTOMA_PLASTICITY_UP
MILI_PSEUDOPODIA_HAPTOTAXIS_DN	KRIGE_RESPONSE_TO_TOSEDOSTAT_24HR_DN	MISSIAGLIA_REGULATED_BY_METHYLATION_DN
RODWELL_AGING_KIDNEY_NO_BLOOD_UP	MARTINEZ_TP53_TARGETS_DN	PUJANA_XPRSS_INT_NETWORK
SMID_BREAST_CANCER_BASAL_DN	LEE_BMP2_TARGETS_DN	GAVIN_FOXP3_TARGETS_CLUSTER_P6
NABA_MATRISOME_ASSOCIATED	SENESE_HDAC3_TARGETS_DN	ZHANG_BREAST_CANCER_PROGENITORS_UP
DANG_REGULATED_BY_MYC_DN	RICKMAN_METASTASIS_DN	GRAHAM_NORMAL_QUIESCENT_VS_NORMAL_DIVIDING_DN
NABA_ECM_REGULATORS	KUMAR_TARGETS_OF_MLL_AF9_FUSION	WINNEPENNINCKX_MELANOMA_METASTASIS_UP
MCBRYAN_PUBERTAL_BREAST_4_5WK_UP	WANG_MLL_TARGETS	BENPORATH_PROLIFERATION
RIGGI_EWING_SARCOMA_PROGENITOR_DN	GARY_CD5_TARGETS_DN	MARKEY_RB1_ACUTE_LOF_DN
DAVICIONI_MOLECULAR_ARMS_VS_ERMS_DN	GARY_CD5_TARGETS_UP	PYEON_CANCER_HEAD_AND_NECK_VS_CERVICAL_UP
LOPEZ_MBD_TARGETS	MARTENS_TRETINOIN_RESPONSE_DN	LI_AMPLIFIED_IN_LUNG_CANCER
BERENJENO_TRANSFORMED_BY_RHOA_DN	IZADPANAH_STEM_CELL_ADIPOSE_VS_BONE_DN	LEE_EARLY_T_LYMPHOCYTE_UP
LIM_MAMMARY_STEM_CELL_UP	CHARAFE_BREAST_CANCER_LUMINAL_VS_BASAL_UP	REACTOME_DNA_REPLICATION
FOSTER_KDM1A_TARGETS_UP	SMID_BREAST_CANCER_BASAL_UP	FOURNIER_ACINAR_DEVELOPMENT_LATE_2
ENK_UV_RESPONSE_KERATINOCYTE_UP	HOOI_ST7_TARGETS_DN	CROONQUIST_NRAS_SIGNALING_DN
BOQUEST_STEM_CELL_CULTURED_VS_FRESH_UP	PUJANA_ATM_PCC_NETWORK	SABATES_COLORECTAL_ADENOMA_UP
DAVICIONI_TARGETS_OF_PAX_FOXO1_FUSIONS_UP	RODRIGUES_THYROID_CARCINOMA_ANAPLASTIC_UP	NAKAYAMA_SOFT_TISSUE_TUMORS_PCA2_UP
SANSOM_APC_TARGETS_DN	HELLER_HDAC_TARGETS_DN	REACTOME_MITOTIC_M_M_G1_PHASES
DEBIASI_APOPTOSIS_BY_REOVIRUS_INFECTION_DN	SPIELMAN_LYMPHOBLAST_EUROPEAN_VS_ASIAN_UP	KANG_DOXORUBICIN_RESISTANCE_UP
YAGI_AML_WITH_INV_16_TRANSLOCATION	BENPORATH_NANOG_TARGETS	LIM_MAMMARY_STEM_CELL_DN
IVANOVA_HEMATOPOIESIS_STEM_CELL_LONG_TERM	WANG_RESPONSE_TO_GSK3_INHIBITOR_SB216763_DN	CROONQUIST_IL6_DEPRIVATION_DN
ZHU_CMV_ALL_DN	MCBRYAN_PUBERTAL_TGFB1_TARGETS_UP	REACTOME_MITOTIC_PROMETAPHASE
PILON_KLF1_TARGETS_UP	MCBRYAN_PUBERTAL_BREAST_3_4WK_UP	WHITFIELD_CELL_CYCLE_G2
CHARAFE_BREAST_CANCER_LUMINAL_VS_MESENCHYMAL_DN	VECCHI_GASTRIC_CANCER_EARLY_UP	TOYOTA_TARGETS_OF_MIR34B_AND_MIR34C
CHIARADONNA_NEOPLASTIC_TRANSFORMATION_KRAS_DN	BUYTAERT_PHOTODYNAMIC_THERAPY_STRESS_DN	KAUFFMANN_MELANOMA_RELAPSE_UP
PEREZ_TP53_AND_TP63_TARGETS	MONNIER_POSTRADIATION_TUMOR_ESCAPE_UP	BURTON_ADIPOGENESIS_3
ACEVEDO_FGFR1_TARGETS_IN_PROSTATE_CANCER_MODEL_DN	ONDER_CDH1_TARGETS_1_UP	GOLDRATH_ANTIGEN_RESPONSE
KIM_ALL_DISORDERS_CALB1_CORR_UP	TIEN_INTESTINE_PROBIOTICS_24HR_UP	ZHOU_CELL_CYCLE_GENES_IN_IR_RESPONSE_6HR
WALLACE_PROSTATE_CANCER_RACE_UP	GRADE_COLON_CANCER_UP	ZHANG_TLX_TARGETS_DN
MARTINEZ_RB1_TARGETS_UP	GOBERT_OLIGODENDROCYTE_DIFFERENTIATION_UP	LI_WILMS_TUMOR_VS_FETAL_KIDNEY_1_DN
CHIARADONNA_NEOPLASTIC_TRANSFORMATION_CDC25_UP	BENPORATH_SOX2_TARGETS	PUJANA_BRCA_CENTERED_NETWORK
KRIGE_RESPONSE_TO_TOSEDOSTAT_24HR_UP	NUYTTEN_EZH2_TARGETS_DN	BIDUS_METASTASIS_UP
SENESE_HDAC1_TARGETS_DN	WAKABAYASHI_ADIPOGENESIS_PPARG_BOUND_8D	WEST_ADRENOCORTICAL_TUMOR_UP
RODRIGUES_NTN1_TARGETS_DN	SMID_BREAST_CANCER_RELAPSE_IN_BONE_DN	SHEPARD_CRUSH_AND_BURN_MUTANT_DN
ONDER_CDH1_TARGETS_2_UP	SMID_BREAST_CANCER_LUMINAL_B_DN	ODONNELL_TARGETS_OF_MYC_AND_TFRC_DN
WELCSH_BRCA1_TARGETS_DN	BENPORATH_MYC_MAX_TARGETS	MORI_IMMATURE_B_LYMPHOCYTE_DN
MEISSNER_NPC_HCP_WITH_H3_UNMETHYLATED	MARSON_BOUND_BY_FOXP3_UNSTIMULATED	MOLENAAR_TARGETS_OF_CCND1_AND_CDK4_DN
YAMAZAKI_TCEB3_TARGETS_UP	BONOME_OVARIAN_CANCER_SURVIVAL_OPTIMAL_DEBULKING	REN_BOUND_BY_E2F
REACTOME_DEVELOPMENTAL_BIOLOGY	FARMER_BREAST_CANCER_APOCRINE_VS_BASAL	ZHOU_CELL_CYCLE_GENES_IN_IR_RESPONSE_24HR
GAZDA_DIAMOND_BLACKFAN_ANEMIA_ERYTHROID_DN	CHYLA_CBFA2T3_TARGETS_DN	COLDREN_GEFITINIB_RESISTANCE_DN
KRIGE_RESPONSE_TO_TOSEDOSTAT_6HR_UP	FARMER_BREAST_CANCER_BASAL_VS_LULMINAL	CHARAFE_BREAST_CANCER_BASAL_VS_MESENCHYMAL_UP
JAATINEN_HEMATOPOIETIC_STEM_CELL_DN	CHARAFE_BREAST_CANCER_LUMINAL_VS_MESENCHYMAL_UP	GRADE_COLON_AND_RECTAL_CANCER_UP
BENPORATH_OCT4_TARGETS	ENK_UV_RESPONSE_EPIDERMIS_UP	MUELLER_PLURINET
KINSEY_TARGETS_OF_EWSR1_FLII_FUSION_DN	SENGUPTA_NASOPHARYNGEAL_CARCINOMA_WITH_LMP1_UP	BASAKI_YBX1_TARGETS_UP
THUM_SYSTOLIC_HEART_FAILURE_DN	ACEVEDO_LIVER_CANCER_UP	BLUM_RESPONSE_TO_SALIRASIB_DN
PETROVA_ENDOTHELIUM_LYMPHATIC_VS_BLOOD_DN	HOLLMANN_APOPTOSIS_VIA_CD40_DN	DELYS_THYROID_CANCER_UP
DURAND_STROMA_S_UP	PUJANA_BRCA1_PCC_NETWORK	OXFORD_RALA_OR_RALB_TARGETS_UP
MARTINEZ_TP53_TARGETS_UP	MOHANKUMAR_TLX1_TARGETS_UP	FEVR_CTNNB1_TARGETS_DN
HAMAI_APOPTOSIS_VIA_TRAIL_UP	SENESE_HDAC3_TARGETS_UP	WHITFIELD_CELL_CYCLE_S
ROZANOV_MMP14_TARGETS_UP	CHICAS_RB1_TARGETS_GROWING	CASORELLI_ACUTE_PROMYELOCYTIC_LEUKEMIA_DN
FORTSCHEGGER_PHF8_TARGETS_DN	LU_EZH2_TARGETS_DN	LIAO_METASTASIS
SERVITJA_ISLET_HNF1A_TARGETS_UP	WINTER_HYPOXIA_METAGENE	SHEDDEN_LUNG_CANCER_GOOD_SURVIVAL_A12
ZHANG_TLX_TARGETS_60HR_UP	OSMAN_BLADDER_CANCER_DN	CHEMNITZ_RESPONSE_TO_PROSTAGLANDIN_E2_UP
LEE_NEURAL_CREST_STEM_CELL_UP	PURBEY_TARGETS_OF_CTBP1_AND_SATB1_DN	ISHIDA_E2F_TARGETS
KAAB_FAILED_HEART_ATRIUM_DN	BENPORATH_CYCLING_GENES	JAEGER_METASTASIS_DN
TAKEDA_TARGETS_OF_NUP98_HOXA9_FUSION_8D_DN	WAMUNYOKOLI_OVARIAN_CANCER_LMP_UP	CHIARADONNA_NEOPLASTIC_TRANSFORMATION_KRAS_UP
AMUNDSON_POOR_SURVIVAL_AFTER_GAMMA_RADIATION_8G	GRAESSMANN_APOPTOSIS_BY_DOXORUBICIN_DN	GRAHAM_CML_DIVIDING_VS_NORMAL_QUIESCENT_UP
CHICAS_RB1_TARGETS_CONFLUENT	GABRIELY_MIR21_TARGETS	SHEPARD_BMYB_TARGETS
MIKKELSEN_NPC_ICP_WITH_H3K4ME3	DIAZ_CHRONIC_MEYLOGENOUS_LEUKEMIA_UP	GEORGES_TARGETS_OF_MIR192_AND_MIR215
WANG_SMARCE1_TARGETS_UP	TORCHIA_TARGETS_OF_EWSR1_FLI1_FUSION_UP	MORI_LARGE_PRE_BII_LYMPHOCYTE_UP
MARTORIATI_MDM4_TARGETS_FETAL_LIVER_DN	SHETH_LIVER_CANCER_VS_TXNIP_LOSS_PAM4	FERREIRA_EWINGS_SARCOMA_UNSTABLE_VS_STABLE_UP
RUIZ_TNC_TARGETS_UP	BRUINS_UVC_RESPONSE_VIA_TP53_GROUP_D	BOYAULT_LIVER_CANCER_SUBCLASS_G3_UP
DEURIG_T_CELL_PROLYMPHOCYTIC_LEUKEMIA_UP	PUJANA_CHEK2_PCC_NETWORK	CHIANG_LIVER_CANCER_SUBCLASS_UNANNOTATED_DN
BONOME_OVARIAN_CANCER_SURVIVAL_SUBOPTIMAL_DEBULKING	TARTE_PLASMA_CELL_VS_PLASMABLAST_DN	RUIZ_TNC_TARGETS_DN
GRUETZMANN_PANCREATIC_CANCER_UP		VECCHI_GASTRIC_CANCER_ADVANCED_VS_EARLY_DN
		RHODES_UNDIFFERENTIATED_CANCER
		PYEON_HPV_POSITIVE_TUMORS_UP
		WEI_MYCN_TARGETS_WITH_E_BOX
		KAUFFMANN_DNA_REPAIR_GENES
		ZHAN_MULTIPLE_MYELOMA_PR_UP
		SHEPARD_BMYB_MORPHOLINO_DN
		DE_YY1_TARGETS_DN
		WAMUNYOKOLI_OVARIAN_CANCER_GRADES_1_2_UP
		PROVENZANI_METASTASIS_UP
		LIM_MAMMARY_LUMINAL_MATURE_UP
		TARTE_PLASMA_CELL_VS_B_LYMPHOCYTE_UP
		REACTOME_CHROMOSOME_MAINTENANCE
		DOANE_RESPONSE_TO_ANDROGEN_DN
		CONCANNON_APOPTOSIS_BY_EPOXOMICIN_DN
		SU_TESTIS
		SMID_BREAST_CANCER_RELAPSE_IN_BRAIN_DN
		DOANE_BREAST_CANCER_CLASSES_UP
		MITSIADES_RESPONSE_TO_APLIDIN_DN
		AMUNDSON_GAMMA_RADIATION_RESPONSE
		SMID_BREAST_CANCER_RELAPSE_IN_BONE_UP
		BHATTACHARYA_EMBRYONIC_STEM_CELL
		BERENJENO_TRANSFORMED_BY_RHOA_UP
		DITTMER_PTHLH_TARGETS_UP
		ONDER_CDH1_TARGETS_2_DN
		TANG_SENESCENCE_TP53_TARGETS_DN
		DUTERTRE_ESTRADIOL_RESPONSE_6HR_UP
		STEIN_ESRRA_TARGETS_RESPONSIVE_TO_ESTROGEN_DN
		FONTAINE_PAPILLARY_THYROID_CARCINOMA_UP
		KRIEG_HYPOXIA_VIA_KDM3A
		YU_MYC_TARGETS_UP
		BORCZUK_MALIGNANT_MESOTHELIOMA_UP
		WU_CELL_MIGRATION
		REACTOME_SLC_MEDIATED_TRANSMEMBRANE_TRANSPORT
		LE_EGR2_TARGETS_UP
		WHITFIELD_CELL_CYCLE_LITERATURE
		PUIFFE_INVASION_INHIBITED_BY_ASCITES_UP
		NUYTTEN_NIPP1_TARGETS_DN
		REACTOME_TRANSMEMBRANE_TRANSPORT_OF_SMALL_MOLECULES
		TURASHVILI_BREAST_DUCTAL_CARCINOMA_VS_LOBULAR_NORMAL_UP
		SERVITJA_ISLET_HNF1A_TARGETS_DN
		BOYAULT_LIVER_CANCER_SUBCLASS_G23_UP
		SMIRNOV_RESPONSE_TO_IR_6HR_DN
		MORI_PRE_BI_LYMPHOCYTE_UP
		VERNELL_RETINOBLASTOMA_PATHWAY_UP
		LOCKWOOD_AMPLIFIED_IN_LUNG_CANCER
		RHEIN_ALL_GLUCOCORTICOID_THERAPY_DN
		PENG_LEUCINE_DEPRIVATION_DN
		SENESE_HDAC2_TARGETS_UP
		SHAFFER_IRF4_TARGETS_IN_ACTIVATED_DENDRITIC_CELL
		IVANOVA_HEMATOPOIESIS_LATE_PROGENITOR
		COLINA_TARGETS_OF_4EBP1_AND_4EBP2
		ACEVEDO_FGFR1_TARGETS_IN_PROSTATE_CANCER_MODEL_UP
		SHAFFER_IRF4_TARGETS_IN_PLASMA_CELL_VS_MATURE_B_LYMPHOCYTE
		KRASNOSELSKAYA_ILF3_TARGETS_DN
		PILON_KLF1_TARGETS_DN
		PASQUALUCCI_LYMPHOMA_BY_GC_STAGE_UP
		NIKOLSKY_BREAST_CANCER_17Q21_Q25_AMPLICON
		BROWNE_HCMV_INFECTION_30MIN_DN
		BILD_E2F3_ONCOGENIC_SIGNATURE
		LINDGREN_BLADDER_CANCER_CLUSTER_1_DN
		REACTOME_MITOTIC_G1_G1_S_PHASES
		KIM_WT1_TARGETS_8HR_DN
		STEIN_ESRRA_TARGETS
		LEE_LIVER_CANCER_SURVIVAL_DN
		BENPORATH_ES_CORE_NINE_CORRELATED
		SCIBETTA_KDM5B_TARGETS_DN
		DAIRKEE_TERT_TARGETS_UP
		FERRANDO_T_ALL_WITH_MLL_ENL_FUSION_DN
		STAMBOLSKY_RESPONSE_TO_VITAMIN_D3_UP
		BERTUCCI_MEDULLARY_VS_DUCTAL_BREAST_CANCER_UP
		ACEVEDO_LIVER_TUMOR_VS_NORMAL_ADJACENT_TISSUE_UP
		KOKKINAKIS_METHIONINE_DEPRIVATION_96HR_DN
		WU_APOPTOSIS_BY_CDKN1A_VIA_TP53
		DOANE_BREAST_CANCER_ESR1_UP
		TIEN_INTESTINE_PROBIOTICS_24HR_DN
		CHICAS_RB1_TARGETS_SENESCENT
		KOBAYASHI_EGFR_SIGNALING_24HR_UP
		YEGNASUBRAMANIAN_PROSTATE_CANCER
		AFFAR_YY1_TARGETS_DN
		GOZGIT_ESR1_TARGETS_DN
		MORI_MATURE_B_LYMPHOCYTE_DN
		LIEN_BREAST_CARCINOMA_METAPLASTIC_VS_DUCTAL_DN
		CHARAFE_BREAST_CANCER_LUMINAL_VS_BASAL_DN
		GAUSSMANN_MLL_AF4_FUSION_TARGETS_E_UP
		CHICAS_RB1_TARGETS_LOW_SERUM
		PAL_PRMT5_TARGETS_UP
		SPIELMAN_LYMPHOBLAST_EUROPEAN_VS_ASIAN_DN
		HSIAO_LIVER_SPECIFIC_GENES
		MORI_EMU_MYC_LYMPHOMA_BY_ONSET_TIME_UP
		GARGALOVIC_RESPONSE_TO_OXIDIZED_PHOSPHOLIPIDS_TURQUOISE_DN
		NAKAMURA_TUMOR_ZONE_PERIPHERAL_VS_CENTRAL_DN
		WANG_CISPLATIN_RESPONSE_AND_XPC_UP
		PENG_GLUCOSE_DEPRIVATION_DN
		FOSTER_KDM1A_TARGETS_DN
		CREIGHTON_ENDOCRINE_THERAPY_RESISTANCE_3
		YANG_BREAST_CANCER_ESR1_LASER_DN
		VANDESLUIS_COMMD1_TARGETS_GROUP_3_UP
		WHITFIELD_CELL_CYCLE_G1_S
		SATO_SILENCED_BY_METHYLATION_IN_PANCREATIC_CANCER_1
		IVANOVA_HEMATOPOIESIS_EARLY_PROGENITOR
		WALLACE_PROSTATE_CANCER_RACE_DN
		KEGG_CELL_CYCLE
		SHAFFER_IRF4_TARGETS_IN_MYELOMA_VS_MATURE_B_LYMPHOCYTE
		YAMAZAKI_TCEB3_TARGETS_DN
		QI_HYPOXIA
		MAHAJAN_RESPONSE_TO_IL1A_DN
		BASSO_B_LYMPHOCYTE_NETWORK
		YANG_BCL3_TARGETS_UP
		MARTORIATI_MDM4_TARGETS_FETAL_LIVER_UP
		UDAYAKUMAR_MED1_TARGETS_UP
		ALCALAY_AML_BY_NPM1_LOCALIZATION_DN
		BRUECKNER_TARGETS_OF_MIRLET7A3_DN
		REACTOME_POST_TRANSLATIONAL_PROTEIN_MODIFICATION
		REACTOME_GASTRIN_CREB_SIGNALLING_PATHWAY_VIA_PKC_AND_MAPK
		WELCSH_BRCA1_TARGETS_UP
		HUTTMANN_B_CLL_POOR_SURVIVAL_UP
		SANSOM_APC_TARGETS
		STEIN_ESRRA_TARGETS_UP
		KORKOLA_YOLK_SAC_TUMOR
		KEGG_PANCREATIC_CANCER
		ELVIDGE_HIF1A_TARGETS_DN
		MEISSNER_NPC_HCP_WITH_H3K4ME2_AND_H3K27ME3
		MONNIER_POSTRADIATION_TUMOR_ESCAPE_DN
		PUJANA_BREAST_CANCER_LIT_INT_NETWORK
		MIKKELSEN_MEF_ICP_WITH_H3K27ME3
		REACTOME_METABOLISM_OF_CARBOHYDRATES
		LEE_RECENT_THYMIC_EMIGRANT
		KIM_WT1_TARGETS_DN
		DUAN_PRDM5_TARGETS
		PID_AURORA_B_PATHWAY
		ZHAN_MULTIPLE_MYELOMA_CD1_VS_CD2_UP
		MATSUDA_NATURAL_KILLER_DIFFERENTIATION
		ZWANG_DOWN_BY_2ND_EGF_PULSE
		WANG_SMARCE1_TARGETS_DN
		HUANG_GATA2_TARGETS_UP
		KLEIN_PRIMARY_EFFUSION_LYMPHOMA_DN
		CROONQUIST_NRAS_VS_STROMAL_STIMULATION_DN
		STEIN_ESR1_TARGETS
		WHITFIELD_CELL_CYCLE_G2_M
		SMID_BREAST_CANCER_LUMINAL_B_UP
		PID_MYC_ACTIV_PATHWAY
		BROWNE_HCMV_INFECTION_6HR_DN
		BOYLAN_MULTIPLE_MYELOMA_PCA1_UP
		REACTOME_PHOSPHOLIPID_METABOLISM
		HOELZEL_NF1_TARGETS_UP
		PEREZ_TP53_TARGETS
		PECE_MAMMARY_STEM_CELL_DN
		RIGGI_EWING_SARCOMA_PROGENITOR_UP
		COATES_MACROPHAGE_M1_VS_M2_DN
		LASTOWSKA_NEUROBLASTOMA_COPY_NUMBER_UP
		YAGI_AML_SURVIVAL
		PECE_MAMMARY_STEM_CELL_UP
		BORCZUK_MALIGNANT_MESOTHELIOMA_DN
		FARMER_BREAST_CANCER_APOCRINE_VS_LUMINAL
		LI_INDUCED_T_TO_NATURAL_KILLER_DN
		HEDENFALK_BREAST_CANCER_BRCA1_VS_BRCA2
		IZADPANAH_STEM_CELL_ADIPOSE_VS_BONE_UP
		RIZKI_TUMOR_INVASIVENESS_3D_DN
		JOHNSTONE_PARVB_TARGETS_3_UP
		OUELLET_OVARIAN_CANCER_INVASIVE_VS_LMP_UP
		LABBE_TGFB1_TARGETS_DN
		VANOEVELEN_MYOGENESIS_SIN3A_TARGETS
		MATTIOLI_MGUS_VS_PCL
		DANG_MYC_TARGETS_UP
		BOYLAN_MULTIPLE_MYELOMA_C_D_DN
		MARIADASON_RESPONSE_TO_BUTYRATE_SULINDAC_6
		MIYAGAWA_TARGETS_OF_EWSR1_ETS_FUSIONS_UP
		GARCIA_TARGETS_OF_FLI1_AND_DAX1_DN
		NAKAMURA_TUMOR_ZONE_PERIPHERAL_VS_CENTRAL_UP
		RICKMAN_TUMOR_DIFFERENTIATED_WELL_VS_POORLY_DN
		ROESSLER_LIVER_CANCER_METASTASIS_UP
		SANSOM_APC_TARGETS_REQUIRE_MYC
		ZHONG_SECRETOME_OF_LUNG_CANCER_AND_FIBROBLAST
		DANG_BOUND_BY_MYC
		SHEN_SMARCA2_TARGETS_DN
		BHATI_G2M_ARREST_BY_2METHOXYESTRADIOL_UP
		SANSOM_APC_MYC_TARGETS
		REACTOME_SIGNALING_BY_EGFR_IN_CANCER
		YAO_TEMPORAL_RESPONSE_TO_PROGESTERONE_CLUSTER_12
		GAL_LEUKEMIC_STEM_CELL_DN
		REACTOME_PROCESSING_OF_CAPPED_INTRON_CONTAINING_PRE_MRNA
		MOOTHA_PGC
		REACTOME_METABOLISM_OF_PROTEINS
		PLASARI_TGFB1_SIGNALING_VIA_NFIC_1HR_DN
		GRAESSMANN_RESPONSE_TO_MC_AND_SERUM_DEPRIVATION_UP
		PENG_RAPAMYCIN_RESPONSE_UP
		HOSHIDA_LIVER_CANCER_SUBCLASS_S3
		RICKMAN_HEAD_AND_NECK_CANCER_A
		REACTOME_MRNA_PROCESSING
		WANG_TUMOR_INVASIVENESS_DN
		MOOTHA_HUMAN_MITODB_6_2002
		VERHAAK_GLIOBLASTOMA_PRONEURAL
		PEDERSEN_METASTASIS_BY_ERBB2_ISOFORM_4
		KRIEG_HYPOXIA_NOT_VIA_KDM3A
		REACTOME_SIGNALING_BY_INSULIN_RECEPTOR
		RICKMAN_TUMOR_DIFFERENTIATED_WELL_VS_MODERATELY_UP
		KAUFFMANN_DNA_REPLICATION_GENES
		RIZ_ERYTHROID_DIFFERENTIATION
		MEISSNER_BRAIN_HCP_WITH_H3K27ME3
		REACTOME_SIGNALING_BY_ERBB4
		KEGG_GLIOMA
		SERVITJA_LIVER_HNF1A_TARGETS_UP
		IWANAGA_CARCINOGENESIS_BY_KRAS_PTEN_UP
		REACTOME_SIGNALING_BY_SCF_KIT
		PUIFFE_INVASION_INHIBITED_BY_ASCITES_DN
		MCLACHLAN_DENTAL_CARIES_DN
		FOSTER_TOLERANT_MACROPHAGE_UP
		PETROVA_ENDOTHELIUM_LYMPHATIC_VS_BLOOD_UP
		MCLACHLAN_DENTAL_CARIES_UP
		MCBRYAN_PUBERTAL_BREAST_6_7WK_DN
		SEITZ_NEOPLASTIC_TRANSFORMATION_BY_8P_DELETION_UP
		PID_TAP63_PATHWAY
		MCBRYAN_PUBERTAL_BREAST_4_5WK_DN
		MIKKELSEN_MEF_HCP_WITH_H3K27ME3
		JAZAG_TGFB1_SIGNALING_UP
		CHANG_CORE_SERUM_RESPONSE_UP
		ROME_INSULIN_TARGETS_IN_MUSCLE_DN
		GOTZMANN_EPITHELIAL_TO_MESENCHYMAL_TRANSITION_DN
		REACTOME_METABOLISM_OF_LIPIDS_AND_LIPOPROTEINS
		MIKKELSEN_ES_ICP_WITH_H3K4ME3_AND_H3K27ME3
		REACTOME_SIGNALING_BY_ERBB2
		DAVICIONI_MOLECULAR_ARMS_VS_ERMS_UP
		SUNG_METASTASIS_STROMA_UP
		WINTER_HYPOXIA_UP
		CERVERA_SDHB_TARGETS_1_UP
		HADDAD_B_LYMPHOCYTE_PROGENITOR
		ELVIDGE_HIF1A_AND_HIF2A_TARGETS_DN
		GENTILE_UV_LOW_DOSE_DN
		CREIGHTON_ENDOCRINE_THERAPY_RESISTANCE_5
		PANGAS_TUMOR_SUPPRESSION_BY_SMAD1_AND_SMAD5_UP
		YAO_TEMPORAL_RESPONSE_TO_PROGESTERONE_CLUSTER_16
		WILCOX_RESPONSE_TO_PROGESTERONE_UP
		AMBROSINI_FLAVOPIRIDOL_TREATMENT_TP53
		RICKMAN_TUMOR_DIFFERENTIATED_WELL_VS_POORLY_UP
		ELVIDGE_HYPOXIA_BY_DMOG_UP
		PID_CASPASE_PATHWAY
		PURBEY_TARGETS_OF_CTBP1_NOT_SATB1_UP
		TORCHIA_TARGETS_OF_EWSR1_FLI1_FUSION_DN
		BONCI_TARGETS_OF_MIR15A_AND_MIR16_1
		SCHUETZ_BREAST_CANCER_DUCTAL_INVASIVE_DN
		PENG_LEUCINE_DEPRIVATION_UP
		REACTOME_SIGNALING_BY_GPCR
		MANTOVANI_VIRAL_GPCR_SIGNALING_UP
		BYSTRYKH_HEMATOPOIESIS_STEM_CELL_AND_BRAIN_QTL_TRANS
		LABBE_TARGETS_OF_TGFB1_AND_WNT3A_DN
		HOLLMANN_APOPTOSIS_VIA_CD40_UP
		HARRIS_HYPOXIA
		OLSSON_E2F3_TARGETS_DN
		BROWNE_HCMV_INFECTION_18HR_UP
		PID_ERBB1_DOWNSTREAM_PATHWAY
		KEGG_P53_SIGNALING_PATHWAY
		GRAESSMANN_RESPONSE_TO_MC_AND_DOXORUBICIN_UP
		ZHOU_INFLAMMATORY_RESPONSE_LIVE_DN
		KAYO_AGING_MUSCLE_UP
		BIOCARTA_HIVNEF_PATHWAY
		RIGGINS_TAMOXIFEN_RESISTANCE_DN
		GOLDRATH_HOMEOSTATIC_PROLIFERATION
		BHAT_ESR1_TARGETS_NOT_VIA_AKT1_UP
		GRAESSMANN_APOPTOSIS_BY_SERUM_DEPRIVATION_UP
		KYNG_WERNER_SYNDROM_AND_NORMAL_AGING_UP
		MASSARWEH_TAMOXIFEN_RESISTANCE_UP
		WEI_MIR34A_TARGETS
		WIERENGA_STAT5A_TARGETS_GROUP1
		BOYAULT_LIVER_CANCER_SUBCLASS_G1_UP
		RIZKI_TUMOR_INVASIVENESS_3D_UP
		MEISSNER_NPC_HCP_WITH_H3K4ME2
		HIRSCH_CELLULAR_TRANSFORMATION_SIGNATURE_UP
		KATSANOU_ELAVL1_TARGETS_DN
		SENESE_HDAC2_TARGETS_DN
		GROSS_HYPOXIA_VIA_ELK3_AND_HIF1A_DN
		GHANDHI_DIRECT_IRRADIATION_UP
		HUANG_FOXA2_TARGETS_DN
		AMIT_EGF_RESPONSE_480_HELA
		MCBRYAN_PUBERTAL_BREAST_5_6WK_DN
		REACTOME_G_ALPHA_Q_SIGNALLING_EVENTS
		CROMER_METASTASIS_DN
		RICKMAN_TUMOR_DIFFERENTIATED_WELL_VS_MODERATELY_DN
		KEGG_ENDOCYTOSIS
		MULLIGHAN_MLL_SIGNATURE_2_UP
		LABBE_WNT3A_TARGETS_UP
		BYSTRYKH_HEMATOPOIESIS_STEM_CELL_QTL_TRANS
		REACTOME_GPCR_DOWNSTREAM_SIGNALING
		SCHAEFFER_PROSTATE_DEVELOPMENT_12HR_UP
		HELLER_HDAC_TARGETS_SILENCED_BY_METHYLATION_DN
		MOHANKUMAR_TLX1_TARGETS_DN
		RUTELLA_RESPONSE_TO_CSF2RB_AND_IL4_UP
		WOOD_EBV_EBNA1_TARGETS_UP
		REACTOME_CELL_JUNCTION_ORGANIZATION
		REACTOME_GLYCOSAMINOGLYCAN_METABOLISM
		PEDERSEN_TARGETS_OF_611CTF_ISOFORM_OF_ERBB2
		SASAKI_ADULT_T_CELL_LEUKEMIA
		LANDIS_ERBB2_BREAST_TUMORS_324_UP
		VANTVEER_BREAST_CANCER_ESR1_UP
		GRAESSMANN_APOPTOSIS_BY_SERUM_DEPRIVATION_DN
		TOOKER_GEMCITABINE_RESISTANCE_DN
		HUANG_DASATINIB_RESISTANCE_UP
		YAUCH_HEDGEHOG_SIGNALING_PARACRINE_DN
		WHITFIELD_CELL_CYCLE_M_G1
		HADDAD_T_LYMPHOCYTE_AND_NK_PROGENITOR_UP
		BROWNE_HCMV_INFECTION_14HR_UP
		REACTOME_NGF_SIGNALLING_VIA_TRKA_FROM_THE_PLASMA_MEMBRANE
		AZARE_NEOPLASTIC_TRANSFORMATION_BY_STAT3_UP
		AGUIRRE_PANCREATIC_CANCER_COPY_NUMBER_UP
		DOUGLAS_BMI1_TARGETS_DN
		SCHAEFFER_PROSTATE_DEVELOPMENT_48HR_UP
		SANSOM_APC_TARGETS_UP
		HAN_SATB1_TARGETS_UP
		LU_EZH2_TARGETS_UP
		KEGG_PROSTATE_CANCER
		MOOTHA_MITOCHONDRIA
		KOKKINAKIS_METHIONINE_DEPRIVATION_48HR_UP
		OSMAN_BLADDER_CANCER_UP
		BASAKI_YBX1_TARGETS_DN
		GAUSSMANN_MLL_AF4_FUSION_TARGETS_A_UP
		DAZARD_RESPONSE_TO_UV_SCC_DN
		MENSE_HYPOXIA_UP
		GRESHOCK_CANCER_COPY_NUMBER_UP
		BENPORATH_MYC_TARGETS_WITH_EBOX
		CHANDRAN_METASTASIS_UP
		REACTOME_CELL_SURFACE_INTERACTIONS_AT_THE_VASCULAR_WALL
		ZHU_CMV_24_HR_UP
		ZHENG_FOXP3_TARGETS_IN_THYMUS_UP
		WANG_LMO4_TARGETS_DN
		RAMALHO_STEMNESS_UP
		GEORGES_CELL_CYCLE_MIR192_TARGETS
		REACTOME_DOWNSTREAM_SIGNAL_TRANSDUCTION
		MILI_PSEUDOPODIA_HAPTOTAXIS_UP
		DURCHDEWALD_SKIN_CARCINOGENESIS_UP
		DARWICHE_PAPILLOMA_RISK_LOW_DN
		DACOSTA_UV_RESPONSE_VIA_ERCC3_COMMON_DN
		ENK_UV_RESPONSE_KERATINOCYTE_DN
		SENESE_HDAC1_TARGETS_UP
		MULLIGHAN_NPM1_MUTATED_SIGNATURE_2_UP
		LINDVALL_IMMORTALIZED_BY_TERT_DN
		KIM_RESPONSE_TO_TSA_AND_DECITABINE_UP
		HERNANDEZ_MITOTIC_ARREST_BY_DOCETAXEL_2_UP
		FORTSCHEGGER_PHF8_TARGETS_UP
		MARTINEZ_RESPONSE_TO_TRABECTEDIN_DN
		ELVIDGE_HYPOXIA_UP
		PID_DELTA_NP63_PATHWAY
		FERNANDEZ_BOUND_BY_MYC
		BROWNE_HCMV_INFECTION_16HR_UP
		HAN_SATB1_TARGETS_DN
		KEGG_MELANOMA
		REACTOME_P75_NTR_RECEPTOR_MEDIATED_SIGNALLING
		DARWICHE_SQUAMOUS_CELL_CARCINOMA_DN
		JISON_SICKLE_CELL_DISEASE_DN
		LIU_CMYB_TARGETS_UP
		BROWNE_HCMV_INFECTION_4HR_DN
		SHETH_LIVER_CANCER_VS_TXNIP_LOSS_PAM1
		LINSLEY_MIR16_TARGETS
		MIKKELSEN_NPC_HCP_WITH_H3K27ME3
		MARKEY_RB1_CHRONIC_LOF_UP
		ENGELMANN_CANCER_PROGENITORS_DN
		KHETCHOUMIAN_TRIM24_TARGETS_UP
		DUTERTRE_ESTRADIOL_RESPONSE_24HR_DN
		REACTOME_G_ALPHA1213_SIGNALLING_EVENTS
		DARWICHE_PAPILLOMA_RISK_HIGH_DN
		KOYAMA_SEMA3B_TARGETS_DN
		REACTOME_METABOLISM_OF_RNA
		LIU_VMYB_TARGETS_UP
		LUI_THYROID_CANCER_CLUSTER_2
		PID_CXCR4_PATHWAY
		ONKEN_UVEAL_MELANOMA_UP
		ZHANG_TARGETS_OF_EWSR1_FLI1_FUSION
		WANG_LMO4_TARGETS_UP
		DAZARD_RESPONSE_TO_UV_SCC_UP
		LEI_MYB_TARGETS
		REACTOME_DOWNSTREAM_SIGNALING_OF_ACTIVATED_FGFR
		THUM_SYSTOLIC_HEART_FAILURE_UP
		RICKMAN_TUMOR_DIFFERENTIATED_MODERATELY_VS_POORLY_UP
		ST_INTEGRIN_SIGNALING_PATHWAY
		REACTOME_CELL_DEATH_SIGNALLING_VIA_NRAGE_NRIF_AND_NADE
		KRIEG_KDM3A_TARGETS_NOT_HYPOXIA
		KARLSSON_TGFB1_TARGETS_DN
		BROWNE_HCMV_INFECTION_24HR_UP
		REACTOME_CELL_CELL_COMMUNICATION
		REACTOME_SIGNALING_BY_FGFR
		YAO_TEMPORAL_RESPONSE_TO_PROGESTERONE_CLUSTER_6
		HENDRICKS_SMARCA4_TARGETS_UP
		MCBRYAN_PUBERTAL_BREAST_6_7WK_UP
		BOYLAN_MULTIPLE_MYELOMA_C_D_UP
		LEE_LIVER_CANCER_SURVIVAL_UP
		WANG_TUMOR_INVASIVENESS_UP
		FIGUEROA_AML_METHYLATION_CLUSTER_4_UP
		LU_AGING_BRAIN_DN
		ACEVEDO_LIVER_CANCER_WITH_H3K27ME3_DN
		LI_INDUCED_T_TO_NATURAL_KILLER_UP
		MORI_PRE_BI_LYMPHOCYTE_DN
		SMIRNOV_RESPONSE_TO_IR_2HR_DN
		RAY_TUMORIGENESIS_BY_ERBB2_CDC25A_UP
		DELASERNA_MYOD_TARGETS_DN
		REACTOME_SIGNALLING_BY_NGF
		DAZARD_RESPONSE_TO_UV_NHEK_DN
		DELACROIX_RAR_BOUND_ES
		KOKKINAKIS_METHIONINE_DEPRIVATION_48HR_DN
		REACTOME_SIGNALING_BY_FGFR_IN_DISEASE
		IWANAGA_CARCINOGENESIS_BY_KRAS_DN
		HILLION_HMGA1_TARGETS
		ZHANG_BREAST_CANCER_PROGENITORS_DN
		ZHANG_RESPONSE_TO_IKK_INHIBITOR_AND_TNF_UP
		MARTORIATI_MDM4_TARGETS_NEUROEPITHELIUM_DN
		SUNG_METASTASIS_STROMA_DN
		BHATI_G2M_ARREST_BY_2METHOXYESTRADIOL_DN
		KEGG_NEUROTROPHIN_SIGNALING_PATHWAY
		DAZARD_UV_RESPONSE_CLUSTER_G6
		FULCHER_INFLAMMATORY_RESPONSE_LECTIN_VS_LPS_UP
		LEE_CALORIE_RESTRICTION_NEOCORTEX_DN
		NUYTTEN_EZH2_TARGETS_UP
		KEGG_REGULATION_OF_ACTIN_CYTOSKELETON
		PENG_RAPAMYCIN_RESPONSE_DN
		QI_PLASMACYTOMA_DN
		GHANDHI_BYSTANDER_IRRADIATION_UP
		LIU_SOX4_TARGETS_DN
		GROSS_HYPOXIA_VIA_ELK3_UP
		BRUINS_UVC_RESPONSE_EARLY_LATE
		RODWELL_AGING_KIDNEY_NO_BLOOD_DN
		LIN_NPAS4_TARGETS_UP
		BRUECKNER_TARGETS_OF_MIRLET7A3_UP
		DUTERTRE_ESTRADIOL_RESPONSE_6HR_DN
		ZHAN_MULTIPLE_MYELOMA_CD1_AND_CD2_UP
		REACTOME_METABOLISM_OF_MRNA
		REACTOME_CYTOKINE_SIGNALING_IN_IMMUNE_SYSTEM
		TSAI_RESPONSE_TO_IONIZING_RADIATION
		REACTOME_APOPTOSIS
		KARLSSON_TGFB1_TARGETS_UP
		KEGG_T_CELL_RECEPTOR_SIGNALING_PATHWAY
		RODWELL_AGING_KIDNEY_DN
		FIGUEROA_AML_METHYLATION_CLUSTER_6_UP
		PEART_HDAC_PROLIFERATION_CLUSTER_UP
		RODRIGUES_DCC_TARGETS_DN
		BUYTAERT_PHOTODYNAMIC_THERAPY_STRESS_UP
		DACOSTA_UV_RESPONSE_VIA_ERCC3_UP
		HOWLIN_PUBERTAL_MAMMARY_GLAND
		LUI_THYROID_CANCER_CLUSTER_1
		RAY_TUMORIGENESIS_BY_ERBB2_CDC25A_DN
		BOSCO_TH1_CYTOTOXIC_MODULE
		CAIRO_HEPATOBLASTOMA_UP
		MORI_SMALL_PRE_BII_LYMPHOCYTE_DN
		GAVIN_FOXP3_TARGETS_CLUSTER_P3
		HELLER_HDAC_TARGETS_SILENCED_BY_METHYLATION_UP
		LASTOWSKA_NEUROBLASTOMA_COPY_NUMBER_DN
		REACTOME_ADAPTIVE_IMMUNE_SYSTEM
		PARENT_MTOR_SIGNALING_UP
		WANG_CLIM2_TARGETS_UP
		BLALOCK_ALZHEIMERS_DISEASE_DN
		SARRIO_EPITHELIAL_MESENCHYMAL_TRANSITION_DN
		MULLIGHAN_NPM1_SIGNATURE_3_UP
		IVANOVA_HEMATOPOIESIS_MATURE_CELL
		KEGG_PURINE_METABOLISM
		UEDA_PERIFERAL_CLOCK
		GAUSSMANN_MLL_AF4_FUSION_TARGETS_C_UP
		DACOSTA_UV_RESPONSE_VIA_ERCC3_DN

## Sheet: ST2
Supplementary Table 2: C5 Molecular Signature Database pathway enrichment in lung tumors from AA and EA
Enriched in AA lung tumors n=16	Enriched in both AA and EA lung tumors n=27	Enriched in EA lung tumors n=91
RECEPTOR_BINDING	ORGANELLE_LUMEN	M_PHASE
NERVOUS_SYSTEM_DEVELOPMENT	MEMBRANE_ENCLOSED_LUMEN	MITOSIS
MULTICELLULAR_ORGANISMAL_DEVELOPMENT	MITOCHONDRION	M_PHASE_OF_MITOTIC_CELL_CYCLE
EXTRACELLULAR_REGION	CYTOPLASMIC_PART	CELL_CYCLE_PHASE
EXTRACELLULAR_REGION_PART	CYTOPLASM	CELL_CYCLE_PROCESS
SYSTEM_DEVELOPMENT	REGULATION_OF_TRANSCRIPTIONDNA_DEPENDENT	DNA_METABOLIC_PROCESS
PROTEINACEOUS_EXTRACELLULAR_MATRIX	HYDROLASE_ACTIVITY_ACTING_ON_ESTER_BONDS	MITOTIC_CELL_CYCLE
EXTRACELLULAR_MATRIX	NUCLEOBASENUCLEOSIDENUCLEOTIDE_AND_NUCLEIC_ACID_METABOLIC_PROCESS	CELL_CYCLE_GO_0007049
ANATOMICAL_STRUCTURE_DEVELOPMENT	REGULATION_OF_RNA_METABOLIC_PROCESS	CELLULAR_LIPID_METABOLIC_PROCESS
ENZYME_REGULATOR_ACTIVITY	REGULATION_OF_SIGNAL_TRANSDUCTION	OXIDOREDUCTASE_ACTIVITY
ORGAN_MORPHOGENESIS	ORGANELLE_PART	CHROMOSOME
RESPONSE_TO_CHEMICAL_STIMULUS	ORGANELLE_ORGANIZATION_AND_BIOGENESIS	NON_MEMBRANE_BOUND_ORGANELLE
REGULATION_OF_BIOLOGICAL_QUALITY	INTRACELLULAR_ORGANELLE_PART	LIPID_METABOLIC_PROCESS
ION_BINDING	TRANSCRIPTION_DNA_DEPENDENT	INTRACELLULAR_NON_MEMBRANE_BOUND_ORGANELLE
REGULATION_OF_GENE_EXPRESSION	RNA_BIOSYNTHETIC_PROCESS	DNA_REPAIR
MACROMOLECULAR_COMPLEX	PHOSPHORIC_ESTER_HYDROLASE_ACTIVITY	RESPONSE_TO_DNA_DAMAGE_STIMULUS
	TRANSCRIPTION_FROM_RNA_POLYMERASE_II_PROMOTER	RESPONSE_TO_ENDOGENOUS_STIMULUS
	REGULATION_OF_TRANSCRIPTION	CARBOHYDRATE_METABOLIC_PROCESS
	RNA_METABOLIC_PROCESS	CHROMOSOMAL_PART
	BIOPOLYMER_METABOLIC_PROCESS	ALCOHOL_METABOLIC_PROCESS
	NUCLEUS	CHROMOSOME_ORGANIZATION_AND_BIOGENESIS
	REGULATION_OF_NUCLEOBASENUCLEOSIDENUCLEOTIDE_AND_NUCLEIC_ACID_METABOLIC_PROCESS	MACROMOLECULE_CATABOLIC_PROCESS
	POSITIVE_REGULATION_OF_CELLULAR_PROCESS	MICROTUBULE_CYTOSKELETON
	POSITIVE_REGULATION_OF_BIOLOGICAL_PROCESS	REGULATION_OF_CELL_CYCLE
	TRANSCRIPTION	CELLULAR_CARBOHYDRATE_METABOLIC_PROCESS
	REGULATION_OF_METABOLIC_PROCESS	NUCLEOPLASM
	REGULATION_OF_CELLULAR_METABOLIC_PROCESS	CYTOSKELETAL_PART
		NUCLEAR_LUMEN
		NUCLEAR_PART
		CHEMICAL_HOMEOSTASIS
		ACTIVE_TRANSMEMBRANE_TRANSPORTER_ACTIVITY
		CATABOLIC_PROCESS
		NUCLEOLUS
		MACROMOLECULAR_COMPLEX_ASSEMBLY
		HOMEOSTATIC_PROCESS
		CYTOSKELETON
		CELLULAR_COMPONENT_ASSEMBLY
		PROTEIN_COMPLEX_ASSEMBLY
		I_KAPPAB_KINASE_NF_KAPPAB_CASCADE
		INTERPHASE
		MONOCARBOXYLIC_ACID_METABOLIC_PROCESS
		INTERPHASE_OF_MITOTIC_CELL_CYCLE
		CELLULAR_CATABOLIC_PROCESS
		HYDROLASE_ACTIVITY_ACTING_ON_ACID_ANHYDRIDES
		STRUCTURAL_MOLECULE_ACTIVITY
		POSITIVE_REGULATION_OF_DEVELOPMENTAL_PROCESS
		PYROPHOSPHATASE_ACTIVITY
		CATION_HOMEOSTASIS
		TRANSFERASE_ACTIVITY_TRANSFERRING_PHOSPHORUS_CONTAINING_GROUPS
		REGULATION_OF_PROTEIN_KINASE_ACTIVITY
		REGULATION_OF_KINASE_ACTIVITY
		ION_HOMEOSTASIS
		REGULATION_OF_TRANSFERASE_ACTIVITY
		REGULATION_OF_TRANSCRIPTION_FROM_RNA_POLYMERASE_II_PROMOTER
		CARBOXYLIC_ACID_METABOLIC_PROCESS
		POSITIVE_REGULATION_OF_SIGNAL_TRANSDUCTION
		PROTEIN_DIMERIZATION_ACTIVITY
		POSITIVE_REGULATION_OF_METABOLIC_PROCESS
		PROTEIN_TRANSPORT
		MAPKKK_CASCADE_GO_0000165
		ORGANIC_ACID_METABOLIC_PROCESS
		POSITIVE_REGULATION_OF_CELLULAR_METABOLIC_PROCESS
		KINASE_ACTIVITY
		ENZYME_INHIBITOR_ACTIVITY
		PHOSPHORIC_MONOESTER_HYDROLASE_ACTIVITY
		NUCLEOSIDE_TRIPHOSPHATASE_ACTIVITY
		POSITIVE_REGULATION_OF_CELL_PROLIFERATION
		PROTEIN_SERINE_THREONINE_KINASE_ACTIVITY
		DNA_BINDING
		PHOSPHOTRANSFERASE_ACTIVITY_ALCOHOL_GROUP_AS_ACCEPTOR
		ADENYL_NUCLEOTIDE_BINDING
		NUCLEOTIDE_BINDING
		PURINE_NUCLEOTIDE_BINDING
		PROTEIN_KINASE_ACTIVITY
		REGULATION_OF_CATALYTIC_ACTIVITY
		ADENYL_RIBONUCLEOTIDE_BINDING
		POSITIVE_REGULATION_OF_NUCLEOBASENUCLEOSIDENUCLEOTIDE_AND_NUCLEIC_ACID_METABOLIC_PROCESS
		CYTOSKELETON_ORGANIZATION_AND_BIOGENESIS
		PURINE_RIBONUCLEOTIDE_BINDING
		NEGATIVE_REGULATION_OF_NUCLEOBASENUCLEOSIDENUCLEOTIDE_AND_NUCLEIC_ACID_METABOLIC_PROCESS
		ATP_BINDING
		IDENTICAL_PROTEIN_BINDING
		TRANSCRIPTION_FACTOR_BINDING
		CELL_CELL_ADHESION
		TRANSCRIPTION_COFACTOR_ACTIVITY
		PEPTIDASE_ACTIVITY
		INTRACELLULAR_TRANSPORT
		ORGANELLE_MEMBRANE
		MACROMOLECULE_LOCALIZATION
		PROTEIN_LOCALIZATION
		ENZYME_BINDING

## Sheet: ST3
Supplementary Table 3: C6 Molecular Signature Database pathway enrichment in lung tumors in lung tumors from AA and EA
Enriched in AA lung tumors n=6	Enriched in both AA and EA lung tumors n=5	Enriched in EA lung tumors n=58
ESC_V6.5_UP_EARLY.V1_UP	BMI1_DN.V1_DN	MEK_UP.V1_UP
P53_DN.V1_DN	KRAS.DF.V1_UP	E2F1_UP.V1_UP
KRAS.600_UP.V1_UP	LEF1_UP.V1_DN	ERB2_UP.V1_UP
MEK_UP.V1_DN	CAHOY_ASTROGLIAL	GCNP_SHH_UP_LATE.V1_UP
ATF2_UP.V1_DN	JAK2_DN.V1_DN	P53_DN.V1_UP
MYC_UP.V1_DN		RPS14_DN.V1_DN
		IL21_UP.V1_UP
		ATF2_UP.V1_UP
		PKCA_DN.V1_DN
		HOXA9_DN.V1_DN
		NFE2L2.V2
		MTOR_UP.V1_UP
		VEGF_A_UP.V1_DN
		ATF2_S_UP.V1_UP
		DCA_UP.V1_UP
		LTE2_UP.V1_UP
		RB_P130_DN.V1_UP
		RAF_UP.V1_UP
		PRC2_EZH2_UP.V1_UP
		EGFR_UP.V1_DN
		E2F3_UP.V1_UP
		PRC2_EZH2_UP.V1_DN
		JNK_DN.V1_UP
		CSR_LATE_UP.V1_UP
		RAF_UP.V1_DN
		RB_P107_DN.V1_UP
		GCNP_SHH_UP_EARLY.V1_DN
		PRC2_EDD_UP.V1_DN
		KRAS.300_UP.V1_DN
		IL2_UP.V1_UP
		PTEN_DN.V2_UP
		ESC_V6.5_UP_LATE.V1_DN
		CAMP_UP.V1_UP
		SNF5_DN.V1_DN
		EIF4E_DN
		EGFR_UP.V1_UP
		VEGF_A_UP.V1_UP
		ESC_J1_UP_EARLY.V1_UP
		IL15_UP.V1_UP
		CSR_EARLY_UP.V1_UP
		ESC_V6.5_UP_LATE.V1_UP
		ESC_J1_UP_LATE.V1_DN
		ESC_J1_UP_LATE.V1_UP
		NRL_DN.V1_UP
		PIGF_UP.V1_UP
		CYCLIN_D1_KE_.V1_UP
		RAPA_EARLY_UP.V1_DN
		MTOR_UP.N4.V1_UP
		TBK1.DF_DN
		TBK1.DF_UP
		HOXA9_DN.V1_UP
		CTIP_DN.V1_DN
		RB_P130_DN.V1_DN
		PTEN_DN.V2_DN
		ERB2_UP.V1_DN
		RB_DN.V1_UP
		PRC2_EDD_UP.V1_UP
		DCA_UP.V1_DN

## Sheet: ST4
Supplementary Table 4: Connectivity Mapping Predicted Drug Responses in Lung Tumors from African Americans
rank	batch	cmap name	dose	cell	score
1	1094	meteneprost	10 µM	MCF7	1
2	631	betulinic acid	9 µM	HL60	0.962
3	513	rosiglitazone	10 µM	MCF7	0.945
4	623	zaprinast	15 µM	HL60	0.94
5	514	12,13-EODE	200 nM	MCF7	0.91
6	766	adiphenine	11 µM	MCF7	0.882
7	676	3-acetamidocoumarin	20 µM	MCF7	0.877
8	602	fulvestrant	10 nM	HL60	0.864
9	708	dimethadione	31 µM	MCF7	0.862
10	747	doxycycline	8 µM	MCF7	0.859
11	730	xamoterol	5 µM	MCF7	0.854
12	1095	meteneprost	10 µM	PC3	0.853
13	1095	BCB000040	10 µM	PC3	0.848
14	505	5186324	2 µM	MCF7	0.846
15	698	riluzole	15 µM	PC3	0.846
16	747	streptozocin	15 µM	MCF7	0.846
17	771	diethylcarbamazine	10 µM	MCF7	0.844
18	67	iloprost	1 µM	MCF7	0.841
19	747	folic acid	9 µM	MCF7	0.839
20	505	topiramate	3 µM	MCF7	0.837
21	730	neostigmine bromide	13 µM	MCF7	0.834
22	630	ketoconazole	8 µM	HL60	0.832
23	747	isoniazid	29 µM	MCF7	0.828
24	112	benserazide	10 µM	MCF7	0.825
25	626	sirolimus	100 nM	MCF7	0.818
26	646	bambuterol	10 µM	MCF7	0.818
27	729	ambroxol	10 µM	MCF7	0.812
28	766	thiamphenicol	11 µM	MCF7	0.811
29	657	harmol	16 µM	MCF7	0.811
30	741	ribavirin	16 µM	MCF7	0.81
31	747	ketotifen	9 µM	MCF7	0.809
32	635	atovaquone	11 µM	HL60	0.805
33	1041	alprostadil	10 µM	MCF7	0.805
34	514	minocycline	11 µM	MCF7	0.798
35	767	rosiglitazone	10 µM	MCF7	0.797
36	747	cefotaxime	8 µM	MCF7	0.793
37	703	parbendazole	16 µM	PC3	0.79
38	650	troglitazone	10 µM	HL60	0.789
39	632	amylocaine	15 µM	MCF7	0.786
40	707	bemegride	26 µM	MCF7	0.784
41	1093	16-phenyltetranorprostaglandin E2	10 µM	PC3	0.783
42	765	estradiol	10 nM	MCF7	0.782
43	514	phentolamine	12 µM	MCF7	0.782
44	54	staurosporine	10 nM	MCF7	0.782
45	766	meclofenamic acid	12 µM	MCF7	0.781
46	678	cefepime	7 µM	MCF7	0.781
47	745	chloropyrazine	35 µM	MCF7	0.778
48	729	mimosine	20 µM	MCF7	0.776
49	646	lidoflazine	8 µM	MCF7	0.776
50	663	Prestwick-682	6 µM	MCF7	0.776
51	661	halofantrine	7 µM	HL60	0.775
52	678	thiethylperazine	6 µM	MCF7	0.774
53	751	lycorine	12 µM	MCF7	0.774
54	663	succinylsulfathiazole	11 µM	MCF7	0.773
55	26b	arachidonyltrifluoromethane	10 µM	MCF7	0.773
56	663	canadine	12 µM	MCF7	0.773
57	602	troglitazone	10 µM	HL60	0.772
58	1029	C-75	10 µM	PC3	0.769
59	736	naproxen	17 µM	MCF7	0.764
60	703	fenbendazole	13 µM	PC3	0.764
61	646	streptomycin	3 µM	MCF7	0.764
62	745	tetracycline	8 µM	MCF7	0.764
63	762	Prestwick-1103	20 µM	PC3	0.763
64	746	butamben	21 µM	MCF7	0.762
65	6	chlorpropamide	100 µM	MCF7	0.761
66	634	progesterone	13 µM	HL60	0.761
67	729	naftidrofuryl	8 µM	MCF7	0.76
68	765	haloperidol	10 µM	MCF7	0.759
69	514	DL-PPMP	2 µM	MCF7	0.758
70	753	dobutamine	12 µM	PC3	0.758
71	665	netilmicin	3 µM	HL60	0.757
72	730	cefotiam	7 µM	MCF7	0.756
73	657	ajmaline	12 µM	MCF7	0.755
74	699	guanadrel	8 µM	MCF7	0.755
75	745	trichostatin A	100 nM	MCF7	0.751
76	1040	Gly-His-Lys	1 µM	PC3	0.751
77	730	ceforanide	8 µM	MCF7	0.75
78	683	tinidazole	16 µM	PC3	0.75
79	505	decitabine	100 nM	MCF7	0.749
80	771	minocycline	8 µM	MCF7	0.749
81	632	minaprine	11 µM	MCF7	0.748
82	771	acemetacin	10 µM	MCF7	0.747
83	771	bumetanide	11 µM	MCF7	0.742
84	622	mepyramine	10 µM	HL60	0.742
85	746	demecarium bromide	6 µM	MCF7	0.739
86	751	Prestwick-675	10 µM	MCF7	0.738
87	710	lisuride	12 µM	PC3	0.737
88	653	fusidic acid	7 µM	MCF7	0.736
89	632	metronidazole	23 µM	MCF7	0.736
90	745	calycanthine	12 µM	MCF7	0.735
91	730	bisoprolol	9 µM	MCF7	0.734
92	700	etiocholanolone	14 µM	MCF7	0.733
93	632	captopril	17 µM	MCF7	0.73
94	748	mesalazine	26 µM	MCF7	0.73
95	665	Prestwick-1103	20 µM	HL60	0.73
96	705	Prestwick-642	14 µM	MCF7	0.73
97	713	sulfafurazole	15 µM	PC3	0.73
98	767	estradiol	10 nM	MCF7	0.729
99	676	alprostadil	11 µM	MCF7	0.728
100	753	esculin	12 µM	PC3	0.727
101	691	myricetin	13 µM	MCF7	0.726
102	627	acetohexamide	12 µM	MCF7	0.725
103	728	benzylpenicillin	11 µM	PC3	0.725
104	649	diethylstilbestrol	15 µM	HL60	0.722
105	747	strophanthidin	10 µM	MCF7	0.719
106	1081	BCB000040	10 µM	PC3	0.719
107	726	biperiden	11 µM	MCF7	0.718
108	616	nalbuphine	10 µM	PC3	0.718
109	504	tretinoin	1 µM	MCF7	0.718
110	26b	sirolimus	100 nM	MCF7	0.718
111	612	sulfaguanidine	19 µM	HL60	0.718
112	662	convolamine	12 µM	MCF7	0.717
113	710	benzbromarone	9 µM	PC3	0.717
114	636	ampyrone	20 µM	MCF7	0.717
115	654	carteolol	12 µM	MCF7	0.717
116	6	tolbutamide	100 µM	MCF7	0.716
117	762	pentoxifylline	14 µM	PC3	0.715
118	677	Prestwick-1082	12 µM	MCF7	0.713
119	701	karakoline	11 µM	PC3	0.713
120	1081	15(S)-15-methylprostaglandin E2	10 µM	PC3	0.713
121	729	diclofenamide	13 µM	MCF7	0.712
122	1047	16,16-dimethylprostaglandin E2	10 µM	MCF7	0.711
123	699	sulfadimethoxine	13 µM	MCF7	0.71
124	120	estradiol	10 nM	HL60	0.71
125	765	fluphenazine	10 µM	MCF7	0.71
126	699	mephentermine	9 µM	MCF7	0.709
127	38	dexamethasone	1 µM	ssMCF7	0.709
128	1024	PF-01378883-00	10 µM	MCF7	0.708
129	676	methyldopate	15 µM	MCF7	0.706
130	23	exisulind	50 µM	MCF7	0.706
131	623	hycanthone	11 µM	HL60	0.705
132	764	pyrithyldione	24 µM	PC3	0.705
133	772	ajmaline	12 µM	MCF7	0.704
134	632	phenazone	21 µM	MCF7	0.704
135	623	enoxacin	12 µM	HL60	0.704
136	767	genistein	10 µM	MCF7	0.704
137	670	calcium folinate	8 µM	MCF7	0.704
138	656	R-atenolol	15 µM	MCF7	0.704
139	705	lidocaine	15 µM	MCF7	0.704
140	772	mefexamide	13 µM	MCF7	0.703
141	513	genistein	10 µM	MCF7	0.702
142	703	tolbutamide	15 µM	PC3	0.702
143	767	haloperidol	10 µM	MCF7	0.701
144	661	pizotifen	9 µM	HL60	0.701
145	678	tropine	28 µM	MCF7	0.701
146	613	paclitaxel	5 µM	HL60	0.7
147	616	dizocilpine	12 µM	PC3	0.7
148	745	cyclopentolate	12 µM	MCF7	0.7
149	713	azathioprine	14 µM	PC3	0.699
150	646	mebeverine	9 µM	MCF7	0.698
151	629	adiphenine	11 µM	HL60	0.698
152	754	sulfacetamide	16 µM	PC3	0.698
153	628	acetazolamide	18 µM	PC3	0.698
154	632	minoxidil	19 µM	MCF7	0.697
155	711	dantrolene	12 µM	MCF7	0.696
156	711	piperacillin	7 µM	MCF7	0.696
157	627	atracurium besilate	3 µM	MCF7	0.695
158	689	selegiline	18 µM	PC3	0.695
159	1091	11-deoxy-16,16-dimethylprostaglandin E2	10 µM	PC3	0.692
160	719	flucloxacillin	8 µM	PC3	0.692
161	772	aminoglutethimide	17 µM	MCF7	0.69
162	705	naringenin	15 µM	MCF7	0.69
163	661	trapidil	19 µM	HL60	0.689
164	663	yohimbic acid	11 µM	MCF7	0.689
165	680	Prestwick-675	10 µM	PC3	0.688
166	685	lomefloxacin	10 µM	MCF7	0.688
167	1094	BCB000040	10 µM	MCF7	0.687
168	741	pivmecillinam	8 µM	MCF7	0.687
169	673	xamoterol	5 µM	MCF7	0.686
170	602	rosiglitazone	10 µM	HL60	0.686
171	771	triprolidine	13 µM	MCF7	0.685
172	687	lycorine	12 µM	MCF7	0.685
173	728	piretanide	11 µM	PC3	0.685
174	676	fursultiamine	9 µM	MCF7	0.685
175	1003	rotenone	1 µM	PC3	0.685
176	690	levobunolol	12 µM	MCF7	0.683
177	603	tretinoin	1 µM	PC3	0.681
178	615	mafenide	18 µM	HL60	0.681
179	1077	AR-A014418	10 µM	PC3	0.681
180	612	diflunisal	16 µM	HL60	0.68
181	704	bicuculline	11 µM	PC3	0.679
182	665	lansoprazole	11 µM	HL60	0.678
183	702	phentolamine	13 µM	PC3	0.678
184	687	tinidazole	16 µM	MCF7	0.678
185	96	MK-886	1 µM	MCF7	0.677
186	1095	CP-863187	10 µM	PC3	0.677
187	772	Prestwick-983	17 µM	MCF7	0.676
188	634	ceforanide	8 µM	HL60	0.676
189	613	guanabenz	14 µM	HL60	0.675
190	691	metrizamide	5 µM	MCF7	0.674
191	688	N-acetyl-L-aspartic acid	23 µM	PC3	0.673
192	691	cimetidine	16 µM	MCF7	0.673
193	23	fulvestrant	10 nM	MCF7	0.671
194	54	iloprost	1 µM	MCF7	0.671
195	663	Prestwick-692	7 µM	MCF7	0.67
196	706	arcaine	15 µM	MCF7	0.67
197	632	acebutolol	11 µM	MCF7	0.67
198	771	fenofibrate	11 µM	MCF7	0.67
199	673	felbinac	19 µM	MCF7	0.669
200	747	sulfamonomethoxine	14 µM	MCF7	0.669
201	506	estradiol	10 nM	MCF7	0.669
202	676	fluticasone	8 µM	MCF7	0.668
203	53	LY-294002	100 nM	MCF7	0.667
204	771	dimenhydrinate	9 µM	MCF7	0.667
205	704	novobiocin	6 µM	PC3	0.666
206	28	diclofenac	10 µM	MCF7	0.666
207	761	pergolide	10 µM	PC3	0.664
208	636	triamcinolone	10 µM	MCF7	0.664
209	683	ethotoin	20 µM	PC3	0.664
210	704	pancuronium bromide	5 µM	PC3	0.664
211	733	isoniazid	29 µM	PC3	0.663
212	622	diperodon	9 µM	HL60	0.663
213	771	enalapril	8 µM	MCF7	0.663
214	33	valproic acid	50 µM	MCF7	0.662
215	622	praziquantel	13 µM	HL60	0.662
216	622	antazoline	13 µM	HL60	0.662
217	626	genistein	10 µM	MCF7	0.661
218	713	cotinine	23 µM	PC3	0.661
219	729	tacrine	16 µM	MCF7	0.661
220	748	leflunomide	15 µM	MCF7	0.66
221	683	guaifenesin	20 µM	PC3	0.66
222	707	bretylium tosilate	10 µM	MCF7	0.659
223	771	clemastine	9 µM	MCF7	0.659
224	1094	CP-863187	10 µM	MCF7	0.659
225	623	clorgiline	13 µM	HL60	0.659
226	670	sulfadimethoxine	13 µM	MCF7	0.658
227	649	guanadrel	8 µM	HL60	0.658
228	653	estradiol	15 µM	MCF7	0.658
229	650	rosiglitazone	10 µM	HL60	0.657
230	751	finasteride	11 µM	MCF7	0.657
231	1044	dinoprostone	10 µM	PC3	0.657
232	622	vinpocetine	11 µM	HL60	0.657
233	690	brompheniramine	9 µM	MCF7	0.657
234	705	ethionamide	24 µM	MCF7	0.656
235	513	haloperidol	10 µM	MCF7	0.656
236	701	finasteride	11 µM	PC3	0.656
237	687	PHA-00745360	1 µM	MCF7	0.655
238	1047	5194442	20 µM	MCF7	0.654
239	691	ticlopidine	13 µM	MCF7	0.654
240	630	domperidone	7 µM	HL60	0.654
241	1081	CP-319743	10 µM	PC3	0.653
242	715	ceforanide	8 µM	PC3	0.652
243	744	metoprolol	6 µM	MCF7	0.652
244	710	estrone	15 µM	PC3	0.652
245	733	terazosin	9 µM	PC3	0.652
246	720	citalopram	1 µM	MCF7	0.652
247	686	0317956-0000	10 µM	MCF7	0.651
248	751	foliosidine	13 µM	MCF7	0.651
249	38	estradiol	10 nM	ssMCF7	0.65
250	702	0317956-0000	1 µM	PC3	0.65
251	616	tranexamic acid	25 µM	PC3	0.65
252	733	streptomycin	3 µM	PC3	0.649
253	702	dantrolene	12 µM	PC3	0.649
254	665	proguanil	14 µM	HL60	0.649
255	676	memantine	19 µM	MCF7	0.649
256	733	streptozocin	15 µM	PC3	0.648
257	672	arcaine	15 µM	MCF7	0.648
258	662	racecadotril	10 µM	MCF7	0.648
259	703	Prestwick-1080	15 µM	PC3	0.647
260	681	lomefloxacin	10 µM	PC3	0.647
261	714	ciprofloxacin	11 µM	PC3	0.646
262	612	tolnaftate	13 µM	HL60	0.646
263	747	terazosin	9 µM	MCF7	0.646
264	632	khellin	15 µM	MCF7	0.645
265	711	indapamide	11 µM	MCF7	0.645
266	704	vitexin	9 µM	PC3	0.645
267	616	gallamine triethiodide	4 µM	PC3	0.644
268	103	monastrol	20 µM	MCF7	0.644
269	690	metronidazole	23 µM	MCF7	0.644
270	694	amantadine	10 µM	MCF7	0.644
271	715	metanephrine	17 µM	PC3	0.643
272	631	lumicolchicine	10 µM	HL60	0.643
273	655	ceforanide	8 µM	MCF7	0.643
274	692	isoxsuprine	12 µM	PC3	0.643
275	730	ergocalciferol	10 µM	MCF7	0.642
276	1077	0316684-0000	10 µM	PC3	0.642
277	703	lithocholic acid	11 µM	PC3	0.642
278	703	CP-690334-01	1 µM	PC3	0.641
279	5	estradiol	10 nM	MCF7	0.64
280	677	pivmecillinam	8 µM	MCF7	0.64
281	1091	irinotecan	100 µM	PC3	0.64
282	612	hydrochlorothiazide	13 µM	HL60	0.639
283	687	nialamide	13 µM	MCF7	0.639
284	765	wortmannin	10 nM	MCF7	0.638
285	23	sulindac sulfide	50 µM	MCF7	0.638
286	636	dizocilpine	12 µM	MCF7	0.637
287	733	triamcinolone	10 µM	PC3	0.637
288	693	orciprenaline	8 µM	PC3	0.637
289	505	5140203	15 µM	MCF7	0.637
290	631	cefixime	9 µM	HL60	0.636
291	754	tolfenamic acid	15 µM	PC3	0.636
292	670	atractyloside	5 µM	MCF7	0.636
293	646	terbutaline	7 µM	MCF7	0.636
294	748	bambuterol	10 µM	MCF7	0.636
295	95	arachidonyltrifluoromethane	10 µM	MCF7	0.635
296	1065	PHA-00846566E	10 µM	PC3	0.635
297	1040	alprostadil	10 µM	PC3	0.634
298	633	glipizide	9 µM	MCF7	0.633
299	745	tetrahydroalstonine	11 µM	MCF7	0.633
300	765	genistein	10 µM	MCF7	0.632
301	702	fludrocortisone	9 µM	PC3	0.632
302	23	sulindac	50 µM	MCF7	0.631
303	1075	PHA-00846566E	10 µM	PC3	0.63
304	689	alprostadil	11 µM	PC3	0.63
305	19	rofecoxib	10 µM	MCF7	0.63
306	632	trimethobenzamide	9 µM	MCF7	0.63
307	8	tacrolimus	1 µM	MCF7	0.628
308	745	ciprofibrate	14 µM	MCF7	0.627
309	636	gentamicin	3 µM	MCF7	0.627
310	1047	PHA-00767505E	10 µM	MCF7	0.626
311	691	trimethobenzamide	9 µM	MCF7	0.626
312	765	fulvestrant	10 nM	MCF7	0.626
313	626	haloperidol	10 µM	MCF7	0.626
314	647	chlormezanone	15 µM	MCF7	0.625
315	663	Prestwick-642	14 µM	MCF7	0.625
316	640	tetracaine	13 µM	HL60	0.625
317	747	streptomycin	3 µM	MCF7	0.625
318	632	pheniramine	11 µM	MCF7	0.624
319	766	pergolide	10 µM	MCF7	0.624
320	729	profenamine	11 µM	MCF7	0.624
321	693	amprolium	13 µM	PC3	0.624
322	631	Chicago Sky Blue 6B	4 µM	HL60	0.624
323	629	metformin	24 µM	HL60	0.624
324	644	cinchonine	14 µM	HL60	0.624
325	640	molsidomine	17 µM	HL60	0.623
326	764	midodrine	14 µM	PC3	0.623
327	632	levodopa	20 µM	MCF7	0.622
328	753	clebopride	8 µM	PC3	0.622
329	661	bacitracin	3 µM	HL60	0.622
330	613	aciclovir	18 µM	HL60	0.621
331	629	heptaminol	22 µM	HL60	0.621
332	613	moroxydine	19 µM	HL60	0.62
333	745	tranexamic acid	25 µM	MCF7	0.62
334	748	gentamicin	3 µM	MCF7	0.619
335	38	raloxifene	100 nM	ssMCF7	0.618
336	505	carbamazepine	100 nM	MCF7	0.617
337	1036	Gly-His-Lys	1 µM	PC3	0.617
338	95	monastrol	100 µM	MCF7	0.617
339	1055	pioglitazone	10 µM	MCF7	0.617
340	644	dydrogesterone	13 µM	HL60	0.617
341	636	tranexamic acid	25 µM	MCF7	0.617
342	662	vinburnine	14 µM	MCF7	0.616
343	21	genistein	1 µM	MCF7	0.615
344	771	isotretinoin	13 µM	MCF7	0.615
345	637	cloxacillin	9 µM	MCF7	0.614
346	654	Chicago Sky Blue 6B	4 µM	MCF7	0.614
347	729	moroxydine	19 µM	MCF7	0.614
348	736	nomegestrol	11 µM	MCF7	0.613
349	730	erythromycin	5 µM	MCF7	0.612
350	617	cloxacillin	9 µM	PC3	0.612
351	733	isoetarine	12 µM	PC3	0.612
352	761	disopyramide	12 µM	PC3	0.611
353	627	heptaminol	22 µM	MCF7	0.611
354	761	mecamylamine	20 µM	PC3	0.611
355	703	thiamazole	35 µM	PC3	0.61
356	618	dilazep	6 µM	HL60	0.61
357	711	PHA-00851261E	10 µM	MCF7	0.609
358	672	indoprofen	14 µM	MCF7	0.609
359	1073	AH-6809	1 µM	PC3	0.609
360	743	butirosin	5 µM	MCF7	0.608
361	626	estradiol	10 nM	MCF7	0.608
362	612	diphemanil metilsulfate	10 µM	HL60	0.607
363	21	genistein	1 µM	MCF7	0.606
364	753	cefoperazone	6 µM	PC3	0.606
365	699	cefazolin	8 µM	MCF7	0.606
366	623	ambroxol	10 µM	HL60	0.605
367	747	iopamidol	5 µM	MCF7	0.605
368	75	monorden	100 nM	HL60	0.605
369	641	monocrotaline	12 µM	HL60	0.605
370	672	levobunolol	12 µM	MCF7	0.604
371	654	cefadroxil	11 µM	MCF7	0.604
372	685	ketoprofen	16 µM	MCF7	0.604
373	631	carisoprodol	15 µM	HL60	0.603
374	702	sulfachlorpyridazine	14 µM	PC3	0.602
375	735	vigabatrin	31 µM	MCF7	0.602
376	665	levopropoxyphene	7 µM	HL60	0.601
377	631	amantadine	10 µM	HL60	0.601
378	698	cefamandole	8 µM	PC3	0.6
379	699	0175029-0000	10 µM	MCF7	0.599
380	40	genistein	10 µM	MCF7	0.599
381	506	tanespimycin	1 µM	MCF7	0.599
382	683	spiradoline	1 µM	PC3	0.599
383	745	cytisine	21 µM	MCF7	0.599
384	633	josamycin	5 µM	MCF7	0.599
385	756	ribavirin	16 µM	MCF7	0.598
386	741	triamterene	16 µM	MCF7	0.598
387	651	gabapentin	23 µM	HL60	0.596
388	771	telenzepine	9 µM	MCF7	0.596
389	687	guaifenesin	20 µM	MCF7	0.596
390	714	propofol	22 µM	PC3	0.596
391	733	iopamidol	5 µM	PC3	0.595
392	1083	meteneprost	10 µM	PC3	0.595
393	633	lisuride	12 µM	MCF7	0.594
394	641	tomatidine	10 µM	HL60	0.594
395	702	vincamine	11 µM	PC3	0.594
396	746	hexylcaine	13 µM	MCF7	0.593
397	743	tetryzoline	17 µM	MCF7	0.593
398	665	loracarbef	11 µM	HL60	0.592
399	751	citiolone	25 µM	MCF7	0.591
400	658	carbenoxolone	7 µM	HL60	0.589
401	644	hydroxyachillin	14 µM	HL60	0.588
402	733	meropenem	10 µM	PC3	0.587
403	703	camptothecin	11 µM	PC3	0.587
404	762	harmol	16 µM	PC3	0.587
405	603	LY-294002	100 nM	PC3	0.586
406	1064	6-bromoindirubin-3'-oxime	500 nM	MCF7	0.586
407	676	harpagoside	8 µM	MCF7	0.586
408	750	fulvestrant	10 nM	HL60	0.584
409	708	hymecromone	23 µM	MCF7	0.584
410	690	memantine	19 µM	MCF7	0.583
411	754	naproxen	17 µM	PC3	0.583
412	685	metoclopramide	12 µM	MCF7	0.582
413	680	isocarboxazid	17 µM	PC3	0.582
414	616	dihydrostreptomycin	3 µM	PC3	0.582
415	617	iproniazid	14 µM	PC3	0.581
416	676	zardaverine	15 µM	MCF7	0.581
417	1008	rotenone	1 µM	MCF7	0.581
418	708	guanabenz	14 µM	MCF7	0.581
419	683	citalopram	1 µM	PC3	0.581
420	688	carbarsone	15 µM	PC3	0.579
421	702	PHA-00851261E	1 µM	PC3	0.578
422	622	mifepristone	9 µM	HL60	0.578
423	678	ramipril	10 µM	MCF7	0.578
424	758	serotonin	19 µM	MCF7	0.578
425	693	salsolinol	15 µM	PC3	0.577
426	758	timolol	9 µM	MCF7	0.576
427	692	hydroxyachillin	14 µM	PC3	0.576
428	704	paromomycin	6 µM	PC3	0.576
429	603	estradiol	10 nM	PC3	0.575
430	713	cefalexin	11 µM	PC3	0.574
431	725	clozapine	10 µM	MCF7	0.573
432	633	paclitaxel	5 µM	MCF7	0.573
433	630	3-hydroxy-DL-kynurenine	18 µM	HL60	0.572
434	735	melatonin	17 µM	MCF7	0.572
435	736	acemetacin	10 µM	MCF7	0.572
436	672	spectinomycin	10 µM	MCF7	0.572
437	761	hydroflumethiazide	12 µM	PC3	0.571
438	720	lycorine	12 µM	MCF7	0.57
439	632	cimetidine	16 µM	MCF7	0.569
440	677	lansoprazole	11 µM	MCF7	0.569
441	631	SR-95639A	10 µM	HL60	0.569
442	745	etanidazole	19 µM	MCF7	0.569
443	642	orphenadrine	13 µM	MCF7	0.569
444	627	sulfaphenazole	13 µM	MCF7	0.568
445	720	CP-320650-01	10 µM	MCF7	0.568
446	758	thioperamide	10 µM	MCF7	0.568
447	718	trimetazidine	12 µM	PC3	0.567
448	649	merbromin	5 µM	HL60	0.566
449	676	etilefrine	18 µM	MCF7	0.566
450	711	phentolamine	13 µM	MCF7	0.566
451	629	diphenhydramine	14 µM	HL60	0.565
452	611	edrophonium chloride	20 µM	PC3	0.565
453	733	cinnarizine	11 µM	PC3	0.564
454	664	Prestwick-984	9 µM	HL60	0.564
455	1078	0198306-0000	10 µM	MCF7	0.563
456	735	nitrendipine	11 µM	MCF7	0.563
457	771	dropropizine	17 µM	MCF7	0.563
458	693	dydrogesterone	13 µM	PC3	0.562
459	693	Prestwick-967	26 µM	PC3	0.562
460	680	cefamandole	8 µM	PC3	0.562
461	631	lactobionic acid	11 µM	HL60	0.56
462	712	ritodrine	12 µM	PC3	0.56
463	764	sulfapyridine	16 µM	PC3	0.56
464	75	1,5-isoquinolinediol	100 µM	HL60	0.56
465	732	sulfamethizole	15 µM	PC3	0.56
466	677	iopanoic acid	7 µM	MCF7	0.56
467	749	cefepime	7 µM	HL60	0.56
468	646	chlortalidone	12 µM	MCF7	0.56
469	752	terazosin	9 µM	MCF7	0.559
470	615	flumequine	15 µM	HL60	0.559
471	710	(+)-isoprenaline	11 µM	PC3	0.558
472	644	harman	18 µM	HL60	0.558
473	635	ethionamide	24 µM	HL60	0.558
474	720	PHA-00745360	1 µM	MCF7	0.558
475	693	cefalonium	9 µM	PC3	0.558
476	610	metronidazole	23 µM	PC3	0.558
477	631	chlorogenic acid	11 µM	HL60	0.557
478	771	dyclonine	12 µM	MCF7	0.555
479	646	furosemide	12 µM	MCF7	0.555
480	665	pivmecillinam	8 µM	HL60	0.555
481	673	nizatidine	12 µM	MCF7	0.555
482	681	tropicamide	14 µM	PC3	0.554
483	731	fluorocurarine	12 µM	PC3	0.554
484	1038	16,16-dimethylprostaglandin E2	10 µM	PC3	0.553
485	699	cefamandole	8 µM	MCF7	0.553
486	671	cefoxitin	9 µM	MCF7	0.552
487	743	vinburnine	14 µM	MCF7	0.552
488	704	piromidic acid	14 µM	PC3	0.552
489	706	Prestwick-857	12 µM	MCF7	0.551
490	611	guanabenz	14 µM	PC3	0.551
491	623	brinzolamide	10 µM	HL60	0.551
492	699	isocarboxazid	17 µM	MCF7	0.55
493	720	thiamazole	35 µM	MCF7	0.55
494	737	tridihexethyl	11 µM	MCF7	0.55
495	1024	3-nitropropionic acid	10 µM	MCF7	0.55
496	631	carteolol	12 µM	HL60	0.549
497	661	isometheptene	8 µM	HL60	0.549
498	1084	16-phenyltetranorprostaglandin E2	10 µM	MCF7	0.548
499	651	hecogenin	9 µM	HL60	0.548
500	711	mexiletine	19 µM	MCF7	0.548
501	689	propylthiouracil	23 µM	PC3	0.548
502	700	heliotrine	13 µM	MCF7	0.548
503	654	myricetin	13 µM	MCF7	0.548
504	690	ginkgolide A	10 µM	MCF7	0.548
505	75	SC-58125	10 µM	HL60	0.547
506	612	minoxidil	19 µM	HL60	0.546
507	736	dimenhydrinate	9 µM	MCF7	0.546
508	636	dexamethasone	9 µM	MCF7	0.546
509	688	rifampicin	5 µM	PC3	0.546
510	651	bergenin	12 µM	HL60	0.546
511	43	sodium phenylbutyrate	1 mM	MCF7	0.545
512	630	clozapine	12 µM	HL60	0.544
513	636	acenocoumarol	11 µM	MCF7	0.543
514	31	fasudil	10 µM	MCF7	0.542
515	715	N6-methyladenosine	14 µM	PC3	0.542
516	629	thiamphenicol	11 µM	HL60	0.542
517	749	ciprofibrate	14 µM	HL60	0.542
518	632	isoxsuprine	12 µM	MCF7	0.54
519	616	isoniazid	29 µM	PC3	0.54
520	741	gliquidone	8 µM	MCF7	0.54
521	630	guanfacine	14 µM	HL60	0.539
522	708	josamycin	5 µM	MCF7	0.537
523	752	sulfaquinoxaline	12 µM	MCF7	0.536
524	710	brinzolamide	10 µM	PC3	0.536
525	650	LY-294002	100 nM	HL60	0.536
526	755	benserazide	14 µM	MCF7	0.536
527	629	diprophylline	16 µM	HL60	0.535
528	658	Prestwick-864	35 µM	HL60	0.535
529	659	hymecromone	23 µM	HL60	0.534
530	642	fludrocortisone	9 µM	MCF7	0.534
531	694	mestranol	13 µM	MCF7	0.534
532	641	cytisine	21 µM	HL60	0.534
533	719	bumetanide	11 µM	PC3	0.534
534	694	benzocaine	24 µM	MCF7	0.534
535	689	trimethobenzamide	9 µM	PC3	0.533
536	766	Prestwick-1082	12 µM	MCF7	0.532
537	733	cefotaxime	8 µM	PC3	0.532
538	678	ondansetron	12 µM	MCF7	0.532
539	647	probucol	8 µM	MCF7	0.532
540	720	PHA-00745360	10 µM	MCF7	0.532
541	730	metanephrine	17 µM	MCF7	0.531
542	648	pheneticillin	10 µM	HL60	0.531
543	647	amikacin	7 µM	MCF7	0.529
544	690	trihexyphenidyl	12 µM	MCF7	0.529
545	665	viomycin	5 µM	HL60	0.528
546	670	guaifenesin	20 µM	MCF7	0.527
547	613	glipizide	9 µM	HL60	0.527
548	705	tetramisole	17 µM	MCF7	0.526
549	43	tetraethylenepentamine	10 µM	MCF7	0.526
550	612	4-hydroxyphenazone	20 µM	HL60	0.525
551	730	oxantel	7 µM	MCF7	0.525
552	631	dl-alpha tocopherol	9 µM	HL60	0.525
553	771	pimethixene	10 µM	MCF7	0.523
554	644	vitexin	9 µM	HL60	0.523
555	682	proglumide	12 µM	PC3	0.523
556	688	etifenin	12 µM	PC3	0.523
557	693	oxetacaine	9 µM	PC3	0.523
558	622	oxybutynin	10 µM	HL60	0.522
559	705	3-acetamidocoumarin	20 µM	MCF7	0.522
560	506	tanespimycin	1 µM	MCF7	0.522
561	655	biperiden	11 µM	MCF7	0.521
562	614	acetylsalicylsalicylic acid	13 µM	HL60	0.521
563	623	desipramine	13 µM	HL60	0.521
564	762	chenodeoxycholic acid	10 µM	PC3	0.521
565	40	cobalt chloride	100 µM	MCF7	0.52
566	729	fluvastatin	9 µM	MCF7	0.519
567	728	hydrocotarnine	13 µM	PC3	0.518
568	656	vancomycin	3 µM	MCF7	0.518
569	644	sulfabenzamide	14 µM	HL60	0.517
570	694	nystatin	4 µM	MCF7	0.516
571	1093	CP-944629	10 µM	PC3	0.516
572	641	noscapine	10 µM	HL60	0.516
573	699	metaraminol	9 µM	MCF7	0.516
574	1004	pioglitazone	10 µM	MCF7	0.514
575	641	pyridoxine	19 µM	HL60	0.514
576	663	Prestwick-691	14 µM	MCF7	0.514
577	505	tanespimycin	1 µM	MCF7	0.514
578	701	myosmine	27 µM	PC3	0.513
579	614	pindolol	16 µM	HL60	0.513
580	1051	H-89	500 nM	MCF7	0.513
581	618	fludrocortisone	9 µM	HL60	0.513
582	699	pentolonium	7 µM	MCF7	0.513
583	757	troglitazone	10 µM	MCF7	0.513
584	736	scopolamine N-oxide	10 µM	MCF7	0.513
585	704	naringenin	15 µM	PC3	0.512
586	715	propranolol	14 µM	PC3	0.512
587	661	gliquidone	8 µM	HL60	0.512
588	743	chlorphenamine	10 µM	MCF7	0.511
589	699	merbromin	5 µM	MCF7	0.511
590	627	amitriptyline	13 µM	MCF7	0.511
591	687	parbendazole	16 µM	MCF7	0.51
592	623	zidovudine	15 µM	HL60	0.51
593	630	testosterone	12 µM	HL60	0.51
594	689	L-methionine sulfoximine	22 µM	PC3	0.51
595	629	homatropine	11 µM	HL60	0.51
596	636	mianserin	13 µM	MCF7	0.509
597	690	pheniramine	11 µM	MCF7	0.509
598	41	wortmannin	10 nM	HL60	0.508
599	657	dihydroergocristine	6 µM	MCF7	0.508
600	744	atropine oxide	12 µM	MCF7	0.508
601	771	pinacidil	16 µM	MCF7	0.507
602	688	troleandomycin	5 µM	PC3	0.506
603	1	metformin	1 mM	MCF7	0.506
604	62	quinpirole	1 µM	MCF7	0.506
605	685	foliosidine	13 µM	MCF7	0.505
606	691	cefadroxil	11 µM	MCF7	0.505
607	753	vigabatrin	31 µM	PC3	0.505
608	687	PHA-00745360	10 µM	MCF7	0.504
609	611	ciprofloxacin	11 µM	PC3	0.504
610	653	mimosine	20 µM	MCF7	0.503
611	705	diphemanil metilsulfate	10 µM	MCF7	0.502
612	627	isoxicam	12 µM	MCF7	0.502
613	695	indoprofen	14 µM	MCF7	0.502
614	619	disopyramide	12 µM	HL60	0.502
615	21	prednisolone	1 µM	MCF7	0.502
616	629	moxisylyte	13 µM	HL60	0.501
617	636	spironolactone	10 µM	MCF7	0.501
618	645	lanatoside C	4 µM	HL60	0.501
619	731	tetracycline	8 µM	PC3	0.501
620	657	thiamine	12 µM	MCF7	0.501
621	622	clotrimazole	12 µM	HL60	0.5
622	658	etidronic acid	16 µM	HL60	0.5
623	610	lidocaine	15 µM	PC3	0.5
624	751	helveticoside	7 µM	MCF7	0.5
625	705	iocetamic acid	7 µM	MCF7	0.5
626	657	raubasine	10 µM	MCF7	0.498
627	654	ciclosporin	3 µM	MCF7	0.497
628	733	ticarcillin	9 µM	PC3	0.497
629	112	colchicine	100 nM	MCF7	0.497
630	699	sulfamethoxazole	16 µM	MCF7	0.497
631	699	nalidixic acid	15 µM	MCF7	0.497
632	672	Prestwick-857	12 µM	MCF7	0.495
633	613	dehydrocholic acid	10 µM	HL60	0.494
634	634	ergocalciferol	10 µM	HL60	0.494
635	611	oleandomycin	5 µM	PC3	0.494
636	729	nicotinic acid	32 µM	MCF7	0.493
637	101	geldanamycin	1 µM	MCF7	0.493
638	749	propoxycaine	12 µM	HL60	0.492
639	101	monastrol	100 µM	MCF7	0.492
640	749	ondansetron	12 µM	HL60	0.492
641	744	clidinium bromide	9 µM	MCF7	0.491
642	743	cefapirin	9 µM	MCF7	0.491
643	636	canrenoic acid	10 µM	MCF7	0.491
644	95	geldanamycin	1 µM	MCF7	0.491
645	688	mycophenolic acid	12 µM	PC3	0.49
646	771	glafenine	10 µM	MCF7	0.49
647	691	trimethadione	28 µM	MCF7	0.489
648	644	Prestwick-692	7 µM	HL60	0.488
649	45	estradiol	10 nM	ssMCF7	0.488
650	98	monastrol	20 µM	MCF7	0.487
651	670	isocarboxazid	17 µM	MCF7	0.486
652	710	etynodiol	10 µM	PC3	0.486
653	665	betulin	9 µM	HL60	0.485
654	629	isoxicam	12 µM	HL60	0.485
655	611	josamycin	5 µM	PC3	0.485
656	772	difenidol	12 µM	MCF7	0.485
657	690	suprofen	15 µM	MCF7	0.485
658	715	cefotiam	7 µM	PC3	0.485
659	650	fulvestrant	1 µM	HL60	0.484
660	650	estradiol	10 nM	HL60	0.484
661	665	penbutolol	6 µM	HL60	0.483
662	671	cefapirin	9 µM	MCF7	0.483
663	733	Prestwick-689	10 µM	PC3	0.483
664	689	4-hydroxyphenazone	20 µM	PC3	0.483
665	650	haloperidol	10 µM	HL60	0.482
666	757	nordihydroguaiaretic acid	1 µM	MCF7	0.482
667	755	prazosin	10 µM	MCF7	0.482
668	693	7-aminocephalosporanic acid	15 µM	PC3	0.481
669	629	triflupromazine	10 µM	HL60	0.481
670	602	estradiol	10 nM	HL60	0.481
671	709	oxolamine	9 µM	PC3	0.48
672	58	copper sulfate	100 µM	MCF7	0.48
673	649	atractyloside	5 µM	HL60	0.48
674	611	famotidine	12 µM	PC3	0.479
675	693	phenazone	21 µM	PC3	0.479
676	701	betonicine	25 µM	PC3	0.478
677	661	atropine methonitrate	11 µM	HL60	0.478
678	657	dirithromycin	5 µM	MCF7	0.478
679	618	prilocaine	16 µM	HL60	0.478
680	705	Prestwick-692	7 µM	MCF7	0.477
681	635	pregnenolone	13 µM	HL60	0.477
682	689	diflorasone	8 µM	PC3	0.477
683	96	arachidonic acid	10 µM	MCF7	0.477
684	670	glycopyrronium bromide	10 µM	MCF7	0.476
685	644	sulmazole	14 µM	HL60	0.476
686	1084	CP-863187	10 µM	MCF7	0.476
687	730	digoxin	5 µM	MCF7	0.476
688	712	josamycin	5 µM	PC3	0.476
689	755	bephenium hydroxynaphthoate	9 µM	MCF7	0.476
690	659	nizatidine	12 µM	HL60	0.475
691	685	etiocholanolone	14 µM	MCF7	0.475
692	703	CP-320650-01	10 µM	PC3	0.475
693	707	dicloxacillin	8 µM	MCF7	0.475
694	658	theophylline	20 µM	HL60	0.474
695	602	sirolimus	100 nM	HL60	0.474
696	611	haloperidol	11 µM	PC3	0.474
697	706	harmaline	14 µM	MCF7	0.474
698	691	4-hydroxyphenazone	20 µM	MCF7	0.473
699	693	fosfosal	18 µM	PC3	0.473
700	1038	STOCK1N-35696	15 µM	PC3	0.473
701	650	sirolimus	100 nM	HL60	0.47
702	24	monastrol	100 µM	MCF7	0.47
703	636	diazoxide	17 µM	MCF7	0.469
704	771	prednisolone	11 µM	MCF7	0.469
705	645	finasteride	11 µM	HL60	0.469
706	637	mafenide	18 µM	MCF7	0.468
707	644	boldine	12 µM	HL60	0.468
708	631	cefadroxil	11 µM	HL60	0.467
709	657	tubocurarine chloride	5 µM	MCF7	0.466
710	711	0317956-0000	1 µM	MCF7	0.466
711	753	metitepine	8 µM	PC3	0.465
712	631	cyclobenzaprine	13 µM	HL60	0.464
713	1082	suramin sodium	10 µM	MCF7	0.464
714	69	iloprost	1 µM	SKMEL5	0.464
715	631	piperine	14 µM	HL60	0.463
716	692	propantheline bromide	9 µM	PC3	0.463
717	661	rilmenidine	8 µM	HL60	0.463
718	680	sulfadimethoxine	13 µM	PC3	0.463
719	631	SR-95531	11 µM	HL60	0.462
720	659	pentetic acid	10 µM	HL60	0.461
721	734	bergenin	12 µM	PC3	0.46
722	602	estradiol	100 nM	HL60	0.46
723	26b	LY-294002	10 µM	MCF7	0.459
724	692	molindone	13 µM	PC3	0.459
725	694	digitoxigenin	11 µM	MCF7	0.459
726	73	SC-58125	10 µM	SKMEL5	0.458
727	730	(-)-atenolol	15 µM	MCF7	0.458
728	45	nordihydroguaiaretic acid	1 µM	ssMCF7	0.458
729	715	fusidic acid	7 µM	PC3	0.458
730	630	prochlorperazine	7 µM	HL60	0.458
731	733	diazoxide	17 µM	PC3	0.457
732	658	iocetamic acid	7 µM	HL60	0.457
733	748	acenocoumarol	11 µM	MCF7	0.456
734	644	gelsemine	12 µM	HL60	0.455
735	36	pirinixic acid	100 µM	MCF7	0.455
736	755	nimodipine	10 µM	MCF7	0.455
737	725	alvespimycin	100 nM	MCF7	0.455
738	660	bephenium hydroxynaphthoate	9 µM	HL60	0.454
739	636	tetracycline	8 µM	MCF7	0.454
740	658	nadolol	13 µM	HL60	0.452
741	631	levothyroxine sodium	5 µM	HL60	0.452
742	735	terguride	12 µM	MCF7	0.452
743	658	tolmetin	13 µM	HL60	0.451
744	618	vincamine	11 µM	HL60	0.451
745	96	nifedipine	10 µM	MCF7	0.451
746	17	tomelukast	1 µM	MCF7	0.45
747	632	sulfathiazole	16 µM	MCF7	0.45
748	644	trihexyphenidyl	12 µM	HL60	0.449
749	751	2,6-dimethylpiperidine	27 µM	MCF7	0.448
750	685	myosmine	27 µM	MCF7	0.448
751	630	ouabain	5 µM	HL60	0.448
752	618	griseofulvin	11 µM	HL60	0.448
753	612	miconazole	10 µM	HL60	0.446
754	651	cefoxitin	9 µM	HL60	0.446
755	671	bergenin	12 µM	MCF7	0.446
756	665	asiaticoside	4 µM	HL60	0.445
757	725	acetylsalicylic acid	100 µM	MCF7	0.443
758	748	ramifenazone	14 µM	MCF7	0.443
759	694	scopolamine	12 µM	MCF7	0.443
760	37	rofecoxib	10 µM	HL60	0.441
761	725	haloperidol	10 µM	MCF7	0.44
762	755	oxybenzone	18 µM	MCF7	0.44
763	733	tomatidine	10 µM	PC3	0.44
764	755	butyl hydroxybenzoate	21 µM	MCF7	0.439
765	710	colecalciferol	10 µM	PC3	0.439
766	657	harmalol	15 µM	MCF7	0.439
767	640	clorsulon	11 µM	HL60	0.438
768	648	sulfamethizole	15 µM	HL60	0.438
769	720	parbendazole	16 µM	MCF7	0.437
770	619	enalapril	8 µM	HL60	0.436
771	699	Prestwick-665	12 µM	MCF7	0.435
772	735	prazosin	10 µM	MCF7	0.435
773	743	sulfaquinoxaline	12 µM	MCF7	0.434
774	110b	genistein	10 µM	PC3	0.434
775	746	lobeline	11 µM	MCF7	0.434
776	749	meprylcaine	15 µM	HL60	0.434
777	654	metrizamide	5 µM	MCF7	0.433
778	627	thiamphenicol	11 µM	MCF7	0.432
779	619	acemetacin	10 µM	HL60	0.431
780	699	calcium folinate	8 µM	MCF7	0.43
781	41	raloxifene	100 nM	HL60	0.43
782	615	piroxicam	12 µM	HL60	0.43
783	678	chloropyrazine	35 µM	MCF7	0.43
784	645	betonicine	25 µM	HL60	0.429
785	711	proglumide	12 µM	MCF7	0.428
786	741	lymecycline	7 µM	MCF7	0.428
787	749	tropine	28 µM	HL60	0.426
788	602	clozapine	10 µM	HL60	0.426
789	671	clidinium bromide	9 µM	MCF7	0.426
790	71	troglitazone	10 µM	SKMEL5	0.425
791	670	cefamandole	8 µM	MCF7	0.425
792	613	cotinine	23 µM	HL60	0.425
793	744	amrinone	21 µM	MCF7	0.424
794	627	adiphenine	11 µM	MCF7	0.424
795	699	mephenesin	22 µM	MCF7	0.424
796	21	thalidomide	100 µM	MCF7	0.423
797	690	nafcillin	9 µM	MCF7	0.422
798	655	naringin	7 µM	MCF7	0.422
799	16	LM-1685	10 µM	MCF7	0.422
800	688	6-azathymine	31 µM	PC3	0.421
801	656	colistin	3 µM	MCF7	0.421
802	756	nomegestrol	11 µM	MCF7	0.419
803	646	antazoline	13 µM	MCF7	0.417
804	651	iopamidol	5 µM	HL60	0.416
805	644	bicuculline	11 µM	HL60	0.415
806	726	azathioprine	14 µM	MCF7	0.414
807	644	protoveratrine A	5 µM	HL60	0.414
808	645	myosmine	27 µM	HL60	0.412
809	36	imatinib	10 µM	MCF7	0.412
810	631	metrizamide	5 µM	HL60	0.41
811	712	hymecromone	23 µM	PC3	0.407
812	677	Prestwick-1083	9 µM	MCF7	0.407
813	54	tanespimycin	1 µM	MCF7	0.406
814	706	naphazoline	16 µM	MCF7	0.406
815	705	vancomycin	3 µM	MCF7	0.404
816	629	mefenamic acid	17 µM	HL60	0.404
817	1055	NS-398	10 µM	MCF7	0.402
818	648	abamectin	5 µM	HL60	0.402
819	746	bupropion	14 µM	MCF7	0.401
820	741	harmol	16 µM	MCF7	0.401
821	676	sotalol	13 µM	MCF7	0.4
822	73	wortmannin	10 nM	SKMEL5	0.4
823	655	neostigmine bromide	13 µM	MCF7	0.398
824	644	glimepiride	8 µM	HL60	0.398
825	700	PNU-0230031	1 µM	MCF7	0.395
826	661	azapropazone	13 µM	HL60	0.394
827	619	bupivacaine	12 µM	HL60	0.392
828	645	etiocholanolone	14 µM	HL60	0.392
829	644	sparteine	17 µM	HL60	0.391
830	644	benzocaine	24 µM	HL60	0.39
831	737	pirlindole	12 µM	MCF7	0.389
832	640	ajmaline	12 µM	HL60	0.389
833	602	acetylsalicylic acid	100 µM	HL60	0.389
834	71	indometacin	100 µM	SKMEL5	0.388
835	658	paromomycin	6 µM	HL60	0.388
836	618	pentolonium	7 µM	HL60	0.387
837	16	rofecoxib	10 µM	MCF7	0.387
838	648	sulfaquinoxaline	12 µM	HL60	0.385
839	631	naringenin	15 µM	HL60	0.385
840	1053	AH-23848	1 µM	MCF7	0.384
841	653	buspirone	9 µM	MCF7	0.382
842	692	roxithromycin	5 µM	PC3	0.382
843	752	napelline	11 µM	MCF7	0.381
844	691	decamethonium bromide	10 µM	MCF7	0.378
845	702	0317956-0000	10 µM	PC3	0.376
846	673	primidone	18 µM	MCF7	0.376
847	631	corticosterone	12 µM	HL60	0.375
848	630	clomifene	7 µM	HL60	0.374
849	671	bucladesine	8 µM	MCF7	0.371
850	618	fenbufen	16 µM	HL60	0.369
851	645	helveticoside	7 µM	HL60	0.368
852	737	metformin	24 µM	MCF7	0.366
853	658	suprofen	15 µM	HL60	0.365
854	619	chenodeoxycholic acid	10 µM	HL60	0.359
855	660	estrone	15 µM	HL60	0.359
856	630	hesperidin	7 µM	HL60	0.358
857	728	amrinone	21 µM	PC3	0.357
858	618	trimethoprim	14 µM	HL60	0.353
859	618	nalidixic acid	15 µM	HL60	0.349
860	629	naproxen	17 µM	HL60	0.349
861	623	clopamide	12 µM	HL60	0.348
862	660	nilutamide	13 µM	HL60	0.337
863	650	acetylsalicylic acid	100 µM	HL60	0.335
864	661	remoxipride	10 µM	HL60	0.332
865	650	sirolimus	100 nM	HL60	0.33
866	659	propofol	22 µM	HL60	0.328
867	630	pentoxyverine	8 µM	HL60	0.326
868	618	sulfamethoxazole	16 µM	HL60	0.325
869	650	LY-294002	10 µM	HL60	0.323
870	651	pridinol	10 µM	HL60	0.293
871	645	foliosidine	13 µM	HL60	0.277
872	665	phensuximide	21 µM	HL60	0.251
873	650	valproic acid	50 µM	HL60	0.24
874	628	hydroflumethiazide	12 µM	PC3	0
875	628	atracurium besilate	3 µM	PC3	0
876	628	dapsone	16 µM	PC3	0
877	628	adiphenine	11 µM	PC3	0
878	628	diphenhydramine	14 µM	PC3	0
879	765	valproic acid	500 µM	MCF7	0
880	628	thiamphenicol	11 µM	PC3	0
881	628	heptaminol	22 µM	PC3	0
882	628	triflupromazine	10 µM	PC3	0
883	617	metampicillin	10 µM	PC3	0
884	764	vinburnine	14 µM	PC3	0
885	633	moroxydine	19 µM	MCF7	0
886	761	adiphenine	11 µM	PC3	0
887	626	valproic acid	500 µM	MCF7	0
888	653	hesperidin	7 µM	MCF7	0
889	764	chlortalidone	12 µM	PC3	0
890	628	epirizole	17 µM	PC3	0
891	753	prazosin	10 µM	PC3	0
892	733	folic acid	9 µM	PC3	0
893	766	viomycin	5 µM	MCF7	0
894	761	viomycin	5 µM	PC3	0
895	628	benzonatate	7 µM	PC3	0
896	1041	Gly-His-Lys	1 µM	MCF7	0
897	628	isoflupredone	10 µM	PC3	0
898	719	cyclizine	13 µM	PC3	0
899	1095	vinblastine	100 nM	PC3	0
900	670	merbromin	5 µM	MCF7	0
901	704	Prestwick-692	7 µM	PC3	0
902	761	articaine	12 µM	PC3	0
903	642	vincamine	11 µM	MCF7	0
904	677	levopropoxyphene	7 µM	MCF7	0
905	719	bethanechol	20 µM	PC3	0
906	725	valproic acid	500 µM	MCF7	0
907	743	cefoxitin	9 µM	MCF7	0
908	706	methoxamine	16 µM	MCF7	0
909	1091	fulvestrant	1 µM	PC3	0
910	712	androsterone	14 µM	PC3	0
911	727	estradiol	10 nM	PC3	0
912	676	zalcitabine	19 µM	MCF7	0
913	703	santonin	16 µM	PC3	0
914	628	betazole	27 µM	PC3	0
915	741	netilmicin	3 µM	MCF7	0
916	671	pyrithyldione	24 µM	MCF7	0
917	706	acebutolol	11 µM	MCF7	0
918	704	vancomycin	3 µM	PC3	0
919	616	midodrine	14 µM	PC3	0
920	676	decamethonium bromide	10 µM	MCF7	0
921	772	cloxacillin	9 µM	MCF7	0
922	1093	IC-86621	1 µM	PC3	0
923	703	ciclacillin	12 µM	PC3	0
924	617	meclofenamic acid	12 µM	PC3	0
925	688	amiprilose	12 µM	PC3	0
926	603	sirolimus	100 nM	PC3	0
927	727	valproic acid	1 mM	PC3	0
928	756	bacitracin	3 µM	MCF7	0
929	764	aconitine	6 µM	PC3	0
930	678	mesalazine	26 µM	MCF7	0
931	662	syrosingopine	6 µM	MCF7	0
932	628	metformin	24 µM	PC3	0
933	694	diflunisal	16 µM	MCF7	0
934	616	dihydroergotamine	3 µM	PC3	0
935	1027	orlistat	10 µM	PC3	0
936	627	dapsone	16 µM	MCF7	0
937	698	sulfamethoxazole	16 µM	PC3	0
938	635	orciprenaline	8 µM	HL60	0
939	628	isoxicam	12 µM	PC3	0
940	654	betulinic acid	9 µM	MCF7	0
941	712	iohexol	5 µM	PC3	0
942	758	biperiden	11 µM	MCF7	0
943	706	cefaclor	10 µM	MCF7	0
944	617	aceclofenac	11 µM	PC3	0
945	1062	AG-012559	10 µM	PC3	0
946	709	khellin	15 µM	PC3	0
947	647	adenosine phosphate	11 µM	MCF7	0
948	755	timolol	9 µM	MCF7	0
949	692	lumicolchicine	10 µM	PC3	0
950	728	dacarbazine	22 µM	PC3	0
951	753	2-aminobenzenesulfonamide	23 µM	PC3	0
952	707	benzbromarone	9 µM	MCF7	0
953	662	stachydrine	22 µM	MCF7	0
954	741	heptaminol	22 µM	MCF7	0
955	703	PHA-00745360	1 µM	PC3	0
956	627	naproxen	17 µM	MCF7	0
957	704	ciclosporin	3 µM	PC3	0
958	761	laudanosine	11 µM	PC3	0
959	728	(-)-isoprenaline	16 µM	PC3	0
960	603	fulvestrant	10 nM	PC3	0
961	663	benzocaine	24 µM	MCF7	0
962	681	isosorbide	17 µM	PC3	0
963	617	pentoxifylline	14 µM	PC3	0
964	623	methylergometrine	9 µM	HL60	0
965	681	etiocholanolone	14 µM	PC3	0
966	733	ketotifen	9 µM	PC3	0
967	506	LY-294002	100 nM	MCF7	0
968	689	co-dergocrine mesilate	6 µM	PC3	0
969	772	quinpirole	16 µM	MCF7	0
970	728	iopromide	5 µM	PC3	0
971	662	yohimbine	10 µM	MCF7	0
972	662	quipazine	9 µM	MCF7	0
973	627	homatropine	11 µM	MCF7	0
974	719	metampicillin	10 µM	PC3	0
975	698	sulfadimethoxine	13 µM	PC3	0
976	692	mestranol	13 µM	PC3	0
977	765	sirolimus	100 nM	MCF7	0
978	731	pheneticillin	10 µM	PC3	0
979	681	diphenylpyraline	13 µM	PC3	0
980	704	3-acetamidocoumarin	20 µM	PC3	0
981	713	digoxigenin	10 µM	PC3	0
982	695	letrozole	14 µM	MCF7	0
983	735	coralyne	10 µM	MCF7	0
984	705	bacampicillin	8 µM	MCF7	0
985	706	khellin	15 µM	MCF7	0
986	617	mefexamide	13 µM	PC3	0
987	1062	fulvestrant	1 µM	PC3	0
988	713	methyldopa	19 µM	PC3	0
989	1087	BCB000038	10 µM	PC3	0
990	627	diphenhydramine	14 µM	MCF7	0
991	709	Prestwick-857	12 µM	PC3	0
992	1009	rotenone	1 µM	PC3	0
993	712	guanabenz	14 µM	PC3	0
994	641	demecarium bromide	6 µM	HL60	0
995	764	propoxycaine	12 µM	PC3	0
996	761	isoxicam	12 µM	PC3	0
997	703	diethylstilbestrol	15 µM	PC3	0
998	754	raubasine	10 µM	PC3	0
999	702	flecainide	8 µM	PC3	0
1000	690	nadolol	13 µM	MCF7	0
1001	616	cefotaxime	8 µM	PC3	0
1002	1068	SB-203580	1 µM	MCF7	0
1003	1014	pioglitazone	10 µM	MCF7	0
1004	628	triamterene	16 µM	PC3	0
1005	727	valproic acid	500 µM	PC3	0
1006	665	quinpirole	16 µM	HL60	0
1007	681	karakoline	11 µM	PC3	0
1008	709	methyldopate	15 µM	PC3	0
1009	761	enalapril	8 µM	PC3	0
1010	753	chlorhexidine	8 µM	PC3	0
1011	663	conessine	11 µM	MCF7	0
1012	637	alverine	8 µM	MCF7	0
1013	754	nomegestrol	11 µM	PC3	0
1014	1055	SB-203580	1 µM	MCF7	0
1015	628	mefenamic acid	17 µM	PC3	0
1016	1083	suramin sodium	10 µM	PC3	0
1017	692	idoxuridine	11 µM	PC3	0
1018	633	chlortetracycline	8 µM	MCF7	0
1019	1033	dinoprostone	10 µM	MCF7	0
1020	745	dienestrol	15 µM	MCF7	0
1021	688	levobunolol	12 µM	PC3	0
1022	704	etilefrine	18 µM	PC3	0
1023	713	serotonin	19 µM	PC3	0
1024	734	gentamicin	3 µM	PC3	0
1025	707	brinzolamide	10 µM	MCF7	0
1026	662	epivincamine	11 µM	MCF7	0
1027	704	prednisone	11 µM	PC3	0
1028	744	kinetin	19 µM	MCF7	0
1029	692	pepstatin	6 µM	PC3	0
1030	1062	H-89	500 nM	PC3	0
1031	729	debrisoquine	9 µM	MCF7	0
1032	708	felbinac	19 µM	MCF7	0
1033	698	trimethoprim	14 µM	PC3	0
1034	713	3-hydroxy-DL-kynurenine	18 µM	PC3	0
1035	694	gabexate	10 µM	MCF7	0
1036	761	azapropazone	13 µM	PC3	0
1037	705	captopril	17 µM	MCF7	0
1038	654	N-acetylmuramic acid	14 µM	MCF7	0
1039	687	alpha-ergocryptine	7 µM	MCF7	0
1040	688	Prestwick-864	35 µM	PC3	0
1041	737	dapsone	16 µM	MCF7	0
1042	654	cyanocobalamin	3 µM	MCF7	0
1043	713	biperiden	11 µM	PC3	0
1044	695	iodixanol	3 µM	MCF7	0
1045	694	propantheline bromide	9 µM	MCF7	0
1046	702	dicoumarol	12 µM	PC3	0
1047	702	sulfadimidine	13 µM	PC3	0
1048	654	pepstatin	6 µM	MCF7	0
1049	616	tetracycline	8 µM	PC3	0
1050	681	metoclopramide	12 µM	PC3	0
1051	743	carbinoxamine	10 µM	MCF7	0
1052	694	isoxsuprine	12 µM	MCF7	0
1053	720	CP-320650-01	1 µM	MCF7	0
1054	736	S-propranolol	14 µM	MCF7	0
1055	614	nocodazole	13 µM	HL60	0
1056	646	tremorine	15 µM	MCF7	0
1057	692	colistin	3 µM	PC3	0
1058	741	pentoxifylline	14 µM	MCF7	0
1059	683	CP-320650-01	1 µM	PC3	0
1060	720	diethylstilbestrol	15 µM	MCF7	0
1061	654	amantadine	10 µM	MCF7	0
1062	616	ampyrone	20 µM	PC3	0
1063	771	bupivacaine	12 µM	MCF7	0
1064	753	arecoline	17 µM	PC3	0
1065	713	clozapine	12 µM	PC3	0
1066	737	isometheptene	8 µM	MCF7	0
1067	1091	BCB000039	10 µM	PC3	0
1068	505	celecoxib	10 µM	MCF7	0
1069	755	etynodiol	10 µM	MCF7	0
1070	752	leflunomide	15 µM	MCF7	0
1071	701	etiocholanolone	14 µM	PC3	0
1072	736	piribedil	12 µM	MCF7	0
1073	685	betonicine	25 µM	MCF7	0
1074	1061	SB-203580	1 µM	MCF7	0
1075	505	5186223	12 µM	MCF7	0
1076	663	palmatine	10 µM	MCF7	0
1077	733	sulfamonomethoxine	14 µM	PC3	0
1078	728	clofilium tosylate	8 µM	PC3	0
1079	746	alpha-yohimbine	10 µM	MCF7	0
1080	735	nimodipine	10 µM	MCF7	0
1081	729	chlorprothixene	11 µM	MCF7	0
1082	636	pindolol	16 µM	MCF7	0
1083	712	felbinac	19 µM	PC3	0
1084	672	carbenoxolone	7 µM	MCF7	0
1085	654	bacampicillin	8 µM	MCF7	0
1086	617	mafenide	18 µM	PC3	0
1087	732	ifosfamide	15 µM	PC3	0
1088	688	chlorogenic acid	11 µM	PC3	0
1089	727	haloperidol	10 µM	PC3	0
1090	659	(+)-isoprenaline	11 µM	HL60	0
1091	628	metrifonate	16 µM	PC3	0
1092	662	noscapine	10 µM	MCF7	0
1093	1005	PF-00875133-00	10 µM	PC3	0
1094	642	6-benzylaminopurine	18 µM	MCF7	0
1095	707	(+)-isoprenaline	11 µM	MCF7	0
1096	603	haloperidol	10 µM	PC3	0
1097	727	valproic acid	200 µM	PC3	0
1098	677	prednicarbate	8 µM	MCF7	0
1099	504	5253409	17 µM	MCF7	0
1100	687	CP-320650-01	10 µM	MCF7	0
1101	754	acemetacin	10 µM	PC3	0
1102	688	sisomicin	3 µM	PC3	0
1103	654	dl-alpha tocopherol	9 µM	MCF7	0
1104	655	iohexol	5 µM	MCF7	0
1105	699	atractyloside	5 µM	MCF7	0
1106	646	ketotifen	9 µM	MCF7	0
1107	730	fluoxetine	12 µM	MCF7	0
1108	735	dinoprost	8 µM	MCF7	0
1109	766	dihydroergocristine	6 µM	MCF7	0
1110	744	pindolol	16 µM	MCF7	0
1111	756	Prestwick-983	17 µM	MCF7	0
1112	704	terconazole	8 µM	PC3	0
1113	725	sirolimus	100 nM	MCF7	0
1114	43	sodium phenylbutyrate	1 mM	MCF7	0
1115	1067	SB-202190	1 µM	PC3	0
1116	708	iohexol	5 µM	MCF7	0
1117	688	nadolol	13 µM	PC3	0
1118	743	ribostamycin	7 µM	MCF7	0
1119	656	trimethadione	28 µM	MCF7	0
1120	58	novobiocin	100 µM	MCF7	0
1121	757	sirolimus	100 nM	MCF7	0
1122	646	alprenolol	14 µM	MCF7	0
1123	720	spiradoline	1 µM	MCF7	0
1124	1081	fulvestrant	1 µM	PC3	0
1125	736	iproniazid	14 µM	MCF7	0
1126	695	tocainide	17 µM	MCF7	0
1127	616	pindolol	16 µM	PC3	0
1128	704	pentamidine	7 µM	PC3	0
1129	1077	SC-19220	10 µM	PC3	0
1130	693	tocainide	17 µM	PC3	0
1131	687	fenbendazole	13 µM	MCF7	0
1132	614	disulfiram	13 µM	HL60	0
1133	633	metolazone	11 µM	MCF7	0
1134	703	oxaprozin	14 µM	PC3	0
1135	725	estradiol	10 nM	MCF7	0
1136	653	clebopride	8 µM	MCF7	0
1137	657	tetracaine	13 µM	MCF7	0
1138	647	ambroxol	10 µM	MCF7	0
1139	663	co-dergocrine mesilate	6 µM	MCF7	0
1140	633	midecamycin	5 µM	MCF7	0
1141	648	propidium iodide	6 µM	HL60	0
1142	718	harmalol	15 µM	PC3	0
1143	685	karakoline	11 µM	MCF7	0
1144	757	valproic acid	500 µM	MCF7	0
1145	694	minoxidil	19 µM	MCF7	0
1146	713	aciclovir	18 µM	PC3	0
1147	698	salbutamol	17 µM	PC3	0
1148	694	tolnaftate	13 µM	MCF7	0
1149	728	altizide	10 µM	PC3	0
1150	614	dihydroergotamine	3 µM	HL60	0
1151	676	benzathine benzylpenicillin	4 µM	MCF7	0
1152	672	lasalocid	7 µM	MCF7	0
1153	653	arecoline	17 µM	MCF7	0
1154	749	saquinavir	5 µM	HL60	0
1155	767	sirolimus	100 nM	MCF7	0
1156	683	PHA-00745360	10 µM	PC3	0
1157	688	nafcillin	9 µM	PC3	0
1158	738	metampicillin	10 µM	MCF7	0
1159	691	L-methionine sulfoximine	22 µM	MCF7	0
1160	641	harmine	16 µM	HL60	0
1161	689	Prestwick-691	14 µM	PC3	0
1162	611	midecamycin	5 µM	PC3	0
1163	766	aceclofenac	11 µM	MCF7	0
1164	707	diloxanide	12 µM	MCF7	0
1165	729	paclitaxel	5 µM	MCF7	0
1166	731	physostigmine	6 µM	PC3	0
1167	743	drofenine	11 µM	MCF7	0
1168	632	hydrochlorothiazide	13 µM	MCF7	0
1169	728	metoprolol	6 µM	PC3	0
1170	706	Prestwick-984	9 µM	MCF7	0
1171	737	lobelanidine	11 µM	MCF7	0
1172	687	diethylstilbestrol	15 µM	MCF7	0
1173	628	dexpanthenol	19 µM	PC3	0
1174	677	betulin	9 µM	MCF7	0
1175	728	estropipate	9 µM	PC3	0
1176	713	clofazimine	8 µM	PC3	0
1177	761	clorsulon	11 µM	PC3	0
1178	719	rilmenidine	8 µM	PC3	0
1179	632	tolnaftate	13 µM	MCF7	0
1180	649	alexidine	7 µM	HL60	0
1181	761	thiamphenicol	11 µM	PC3	0
1182	691	carbenoxolone	7 µM	MCF7	0
1183	725	rosiglitazone	10 µM	MCF7	0
1184	628	sulfacetamide	16 µM	PC3	0
1185	603	nordihydroguaiaretic acid	1 µM	PC3	0
1186	692	galantamine	11 µM	PC3	0
1187	735	arecoline	17 µM	MCF7	0
1188	683	PHA-00745360	1 µM	PC3	0
1189	737	levopropoxyphene	7 µM	MCF7	0
1190	663	cinchonine	14 µM	MCF7	0
1191	698	atractyloside	5 µM	PC3	0
1192	735	cefoperazone	6 µM	MCF7	0
1193	737	ornidazole	18 µM	MCF7	0
1194	673	diloxanide	12 µM	MCF7	0
1195	688	cinchonine	14 µM	PC3	0
1196	743	pyrithyldione	24 µM	MCF7	0
1197	752	podophyllotoxin	10 µM	MCF7	0
1198	665	cyclic adenosine monophosphate	12 µM	HL60	0
1199	728	furosemide	12 µM	PC3	0
1200	653	droperidol	11 µM	MCF7	0
1201	734	mesalazine	26 µM	PC3	0
1202	1094	vinblastine	100 nM	MCF7	0
1203	712	chlormezanone	15 µM	PC3	0
1204	616	spironolactone	10 µM	PC3	0
1205	619	fenoterol	10 µM	HL60	0
1206	687	thiamazole	35 µM	MCF7	0
1207	670	diethylstilbestrol	15 µM	MCF7	0
1208	690	boldine	12 µM	MCF7	0
1209	673	bemegride	26 µM	MCF7	0
1210	633	aciclovir	18 µM	MCF7	0
1211	762	ribavirin	16 µM	PC3	0
1212	690	sulmazole	14 µM	MCF7	0
1213	654	naringenin	15 µM	MCF7	0
1214	764	nocodazole	13 µM	PC3	0
1215	680	atractyloside	5 µM	PC3	0
1216	642	ethisterone	13 µM	MCF7	0
1217	727	sirolimus	100 nM	PC3	0
1218	647	maprotiline	13 µM	MCF7	0
1219	672	nadolol	13 µM	MCF7	0
1220	728	kinetin	19 µM	PC3	0
1221	660	altretamine	19 µM	HL60	0
1222	751	diphenylpyraline	13 µM	MCF7	0
1223	1061	trichostatin A	1 µM	MCF7	0
1224	735	clebopride	8 µM	MCF7	0
1225	702	spiramycin	5 µM	PC3	0
1226	677	quinpirole	16 µM	MCF7	0
1227	754	iproniazid	14 µM	PC3	0
1228	603	LY-294002	10 µM	PC3	0
1229	728	clidinium bromide	9 µM	PC3	0
1230	514	demecolcine	12 µM	MCF7	0
1231	680	levomepromazine	9 µM	PC3	0
1232	754	Prestwick-1083	9 µM	PC3	0
1233	700	karakoline	11 µM	MCF7	0
1234	648	ramifenazone	14 µM	HL60	0
1235	692	mebhydrolin	5 µM	PC3	0
1236	715	adenosine phosphate	11 µM	PC3	0
1237	617	fenspiride	13 µM	PC3	0
1238	692	probenecid	14 µM	PC3	0
1239	611	verapamil	8 µM	PC3	0
1240	713	thioperamide	10 µM	PC3	0
1241	751	etiocholanolone	14 µM	MCF7	0
1242	513	valproic acid	500 µM	MCF7	0
1243	734	nadide	6 µM	PC3	0
1244	713	timolol	9 µM	PC3	0
1245	655	pilocarpine	15 µM	MCF7	0
1246	506	valproic acid	500 µM	MCF7	0
1247	746	hydroquinine	9 µM	MCF7	0
1248	714	phenylpropanolamine	21 µM	PC3	0
1249	706	hydrochlorothiazide	13 µM	MCF7	0
1250	706	methyldopate	15 µM	MCF7	0
1251	741	chenodeoxycholic acid	10 µM	MCF7	0
1252	680	merbromin	5 µM	PC3	0
1253	731	terbutaline	7 µM	PC3	0
1254	749	oxedrine	24 µM	HL60	0
1255	688	metronidazole	23 µM	PC3	0
1256	1031	AG-013608	10 µM	PC3	0
1257	612	pheniramine	11 µM	HL60	0
1258	772	halofantrine	7 µM	MCF7	0
1259	712	dehydrocholic acid	10 µM	PC3	0
1260	771	disopyramide	12 µM	MCF7	0
1261	612	tolazoline	20 µM	HL60	0
1262	656	cefaclor	10 µM	MCF7	0
1263	733	benzydamine	12 µM	PC3	0
1264	713	pirenperone	10 µM	PC3	0
1265	750	tretinoin	1 µM	HL60	0
1266	640	harmol	16 µM	HL60	0
1267	653	naftidrofuryl	8 µM	MCF7	0
1268	622	mepacrine	8 µM	HL60	0
1269	619	pergolide	10 µM	HL60	0
1270	678	piretanide	11 µM	MCF7	0
1271	502	ikarugamycin	2 µM	MCF7	0
1272	603	sirolimus	100 nM	PC3	0
1273	619	fenofibrate	11 µM	HL60	0
1274	730	pilocarpine	15 µM	MCF7	0
1275	677	Prestwick-1103	20 µM	MCF7	0
1276	628	homatropine	11 µM	PC3	0
1277	1092	16-phenyltetranorprostaglandin E2	10 µM	MCF7	0
1278	755	pipemidic acid	13 µM	MCF7	0
1279	1005	sirolimus	100 nM	PC3	0
1280	685	finasteride	11 µM	MCF7	0
1281	681	nefopam	14 µM	PC3	0
1282	761	meclofenamic acid	12 µM	PC3	0
1283	678	mephenytoin	18 µM	MCF7	0
1284	1061	carmustine	100 µM	MCF7	0
1285	690	chlorogenic acid	11 µM	MCF7	0
1286	725	tanespimycin	1 µM	MCF7	0
1287	691	tolmetin	13 µM	MCF7	0
1288	700	myosmine	27 µM	MCF7	0
1289	677	risperidone	10 µM	MCF7	0
1290	728	cefalotin	10 µM	PC3	0
1291	736	flavoxate	9 µM	MCF7	0
1292	691	furazolidone	18 µM	MCF7	0
1293	747	diazoxide	17 µM	MCF7	0
1294	735	2-aminobenzenesulfonamide	23 µM	MCF7	0
1295	746	naltrexone	10 µM	MCF7	0
1296	648	streptozocin	15 µM	HL60	0
1297	747	podophyllotoxin	10 µM	MCF7	0
1298	1008	AG-013608	10 µM	MCF7	0
1299	743	naproxen	16 µM	MCF7	0
1300	753	nimodipine	10 µM	PC3	0
1301	647	zaprinast	15 µM	MCF7	0
1302	505	5149715	10 µM	MCF7	0
1303	626	LY-294002	10 µM	MCF7	0
1304	514	yohimbine	23 µM	MCF7	0
1305	761	Prestwick-972	23 µM	PC3	0
1306	702	piperacillin	7 µM	PC3	0
1307	746	cefuroxime	9 µM	MCF7	0
1308	757	estradiol	100 nM	MCF7	0
1309	1027	PF-00539758-00	10 µM	PC3	0
1310	704	beclometasone	8 µM	PC3	0
1311	772	ioxaglic acid	3 µM	MCF7	0
1312	670	levomepromazine	9 µM	MCF7	0
1313	700	finasteride	11 µM	MCF7	0
1314	772	trapidil	19 µM	MCF7	0
1315	762	ethosuximide	28 µM	PC3	0
1316	686	mexiletine	19 µM	MCF7	0
1317	682	dantrolene	12 µM	PC3	0
1318	660	pralidoxime	23 µM	HL60	0
1319	654	digitoxigenin	11 µM	MCF7	0
1320	703	CP-320650-01	1 µM	PC3	0
1321	662	cinchonidine	14 µM	MCF7	0
1322	623	adenosine phosphate	11 µM	HL60	0
1323	662	aconitine	6 µM	MCF7	0
1324	738	bumetanide	11 µM	MCF7	0
1325	713	testosterone	12 µM	PC3	0
1326	687	Prestwick-1080	15 µM	MCF7	0
1327	762	nifenazone	13 µM	PC3	0
1328	1014	PF-00539745-00	10 µM	MCF7	0
1329	613	bromocriptine	5 µM	HL60	0
1330	691	Prestwick-691	14 µM	MCF7	0
1331	661	Prestwick-981	11 µM	HL60	0
1332	687	homosalate	15 µM	MCF7	0
1333	637	metampicillin	10 µM	MCF7	0
1334	764	alprenolol	14 µM	PC3	0
1335	741	lansoprazole	11 µM	MCF7	0
1336	505	sirolimus	100 nM	MCF7	0
1337	628	sulindac	11 µM	PC3	0
1338	735	nizatidine	12 µM	MCF7	0
1339	719	carbamazepine	17 µM	PC3	0
1340	731	ricinine	24 µM	PC3	0
1341	695	zuclopenthixol	9 µM	MCF7	0
1342	505	wortmannin	10 nM	MCF7	0
1343	731	calycanthine	12 µM	PC3	0
1344	753	oxybenzone	18 µM	PC3	0
1345	686	metamizole sodium	12 µM	MCF7	0
1346	502	depudecin	1 µM	MCF7	0
1347	1089	suramin sodium	10 µM	PC3	0
1348	614	isoniazid	29 µM	HL60	0
1349	693	theophylline	20 µM	PC3	0
1350	698	isocarboxazid	17 µM	PC3	0
1351	676	gabexate	10 µM	MCF7	0
1352	745	racecadotril	10 µM	MCF7	0
1353	688	suprofen	15 µM	PC3	0
1354	720	paroxetine	1 µM	MCF7	0
1355	1077	fulvestrant	1 µM	PC3	0
1356	699	griseofulvin	11 µM	MCF7	0
1357	661	flucloxacillin	8 µM	HL60	0
1358	752	metoprolol	6 µM	MCF7	0
1359	687	Prestwick-1100	9 µM	MCF7	0
1360	767	tanespimycin	1 µM	MCF7	0
1361	618	salbutamol	17 µM	HL60	0
1362	692	zardaverine	15 µM	PC3	0
1363	693	letrozole	14 µM	PC3	0
1364	54	chlorpromazine	1 µM	MCF7	0
1365	623	clenbuterol	13 µM	HL60	0
1366	728	clonidine	15 µM	PC3	0
1367	687	pramocaine	12 µM	MCF7	0
1368	651	isoetarine	12 µM	HL60	0
1369	688	trihexyphenidyl	12 µM	PC3	0
1370	744	ampyrone	20 µM	MCF7	0
1371	688	ethambutol	14 µM	PC3	0
1372	633	hydroxyzine	9 µM	MCF7	0
1373	636	dihydrostreptomycin	3 µM	MCF7	0
1374	749	methanthelinium bromide	10 µM	HL60	0
1375	691	alprostadil	11 µM	MCF7	0
1376	689	solanine	5 µM	PC3	0
1377	725	wortmannin	10 nM	MCF7	0
1378	610	pyrimethamine	16 µM	PC3	0
1379	726	pirenperone	10 µM	MCF7	0
1380	772	triflupromazine	10 µM	MCF7	0
1381	686	promazine	12 µM	MCF7	0
1382	690	benzathine benzylpenicillin	4 µM	MCF7	0
1383	712	domperidone	7 µM	PC3	0
1384	758	digoxigenin	10 µM	MCF7	0
1385	736	tolfenamic acid	15 µM	MCF7	0
1386	754	10-methoxyharmalan	19 µM	PC3	0
1387	689	gelsemine	12 µM	PC3	0
1388	610	trimethobenzamide	9 µM	PC3	0
1389	1082	CP-944629	10 µM	MCF7	0
1390	718	diprophylline	16 µM	PC3	0
1391	632	diphemanil metilsulfate	10 µM	MCF7	0
1392	656	lovastatin	10 µM	MCF7	0
1393	642	phentolamine	13 µM	MCF7	0
1394	731	butacaine	13 µM	PC3	0
1395	58	W-13	10 µM	MCF7	0
1396	695	tolazoline	20 µM	MCF7	0
1397	743	isopropamide iodide	8 µM	MCF7	0
1398	622	albendazole	15 µM	HL60	0
1399	719	phensuximide	21 µM	PC3	0
1400	1015	PF-00539745-00	10 µM	PC3	0
1401	653	N6-methyladenosine	14 µM	MCF7	0
1402	646	praziquantel	13 µM	MCF7	0
1403	683	diethylstilbestrol	15 µM	PC3	0
1404	629	betazole	27 µM	HL60	0
1405	653	suloctidil	12 µM	MCF7	0
1406	108	monastrol	100 µM	MCF7	0
1407	661	Prestwick-983	17 µM	HL60	0
1408	761	levocabastine	9 µM	PC3	0
1409	649	alpha-ergocryptine	7 µM	HL60	0
1410	765	rosiglitazone	10 µM	MCF7	0
1411	513	valproic acid	50 µM	MCF7	0
1412	683	paroxetine	1 µM	PC3	0
1413	676	gibberellic acid	12 µM	MCF7	0
1414	1021	0225151-0000	10 µM	PC3	0
1415	644	Prestwick-682	6 µM	HL60	0
1416	695	Prestwick-967	26 µM	MCF7	0
1417	614	neomycin	4 µM	HL60	0
1418	70	tetraethylenepentamine	100 µM	ssMCF7	0
1419	1083	CP-944629	10 µM	PC3	0
1420	688	memantine	19 µM	PC3	0
1421	656	tetramisole	17 µM	MCF7	0
1422	702	lanatoside C	4 µM	PC3	0
1423	704	lidocaine	15 µM	PC3	0
1424	616	nicergoline	8 µM	PC3	0
1425	676	nifurtimox	14 µM	MCF7	0
1426	690	fluticasone	8 µM	MCF7	0
1427	728	diperodon	9 µM	PC3	0
1428	695	picrotoxinin	14 µM	MCF7	0
1429	22a	tacrolimus	1 µM	MCF7	0
1430	610	hydrochlorothiazide	13 µM	PC3	0
1431	762	netilmicin	3 µM	PC3	0
1432	613	erythromycin	5 µM	HL60	0
1433	735	ascorbic acid	22 µM	MCF7	0
1434	737	loracarbef	11 µM	MCF7	0
1435	611	chlortetracycline	8 µM	PC3	0
1436	762	hydrastine hydrochloride	10 µM	PC3	0
1437	661	octopamine	21 µM	HL60	0
1438	730	benfluorex	10 µM	MCF7	0
1439	644	co-dergocrine mesilate	6 µM	HL60	0
1440	727	genistein	10 µM	PC3	0
1441	107	nocodazole	1 µM	MCF7	0
1442	628	todralazine	15 µM	PC3	0
1443	658	benzthiazide	9 µM	HL60	0
1444	633	lynestrenol	14 µM	MCF7	0
1445	767	troglitazone	10 µM	MCF7	0
1446	738	isoflupredone	10 µM	MCF7	0
1447	691	levothyroxine sodium	5 µM	MCF7	0
1448	691	amylocaine	15 µM	MCF7	0
1449	677	viomycin	5 µM	MCF7	0
1450	653	zoxazolamine	24 µM	MCF7	0
1451	641	hydroquinine	9 µM	HL60	0
1452	654	carisoprodol	15 µM	MCF7	0
1453	637	pentoxifylline	14 µM	MCF7	0
1454	690	pronetalol	15 µM	MCF7	0
1455	693	(+/-)-catechin	14 µM	PC3	0
1456	731	dienestrol	15 µM	PC3	0
1457	735	metolazone	11 µM	MCF7	0
1458	772	spaglumic acid	13 µM	MCF7	0
1459	618	fenbendazole	13 µM	HL60	0
1460	698	calcium folinate	8 µM	PC3	0
1461	762	tiletamine	15 µM	PC3	0
1462	637	flumequine	15 µM	MCF7	0
1463	676	oxamniquine	14 µM	MCF7	0
1464	505	5162773	7 µM	MCF7	0
1465	611	azathioprine	14 µM	PC3	0
1466	700	meclofenoxate	14 µM	MCF7	0
1467	746	ondansetron	12 µM	MCF7	0
1468	627	allantoin	25 µM	MCF7	0
1469	688	brompheniramine	9 µM	PC3	0
1470	649	lithocholic acid	11 µM	HL60	0
1471	757	wortmannin	10 nM	MCF7	0
1472	672	furazolidone	18 µM	MCF7	0
1473	1061	SC-560	10 µM	MCF7	0
1474	618	mebendazole	14 µM	HL60	0
1475	710	ouabain	5 µM	PC3	0
1476	686	fludrocortisone	9 µM	MCF7	0
1477	673	esculin	12 µM	MCF7	0
1478	656	tiaprofenic acid	15 µM	MCF7	0
1479	640	scoulerine	12 µM	HL60	0
1480	690	canadine	12 µM	MCF7	0
1481	636	nocodazole	13 µM	MCF7	0
1482	685	benzamil	11 µM	MCF7	0
1483	647	ascorbic acid	22 µM	MCF7	0
1484	755	nilutamide	13 µM	MCF7	0
1485	725	genistein	10 µM	MCF7	0
1486	662	dipivefrine	10 µM	MCF7	0
1487	750	sirolimus	100 nM	HL60	0
1488	688	oxamniquine	14 µM	PC3	0
1489	623	debrisoquine	9 µM	HL60	0
1490	656	tolazamide	13 µM	MCF7	0
1491	641	isocorydine	12 µM	HL60	0
1492	738	carbamazepine	17 µM	MCF7	0
1493	1007	PF-00539745-00	10 µM	PC3	0
1494	502	5252917	14 µM	MCF7	0
1495	1093	BCB000038	10 µM	PC3	0
1496	752	sulfapyridine	16 µM	MCF7	0
1497	70	copper sulfate	100 µM	ssMCF7	0
1498	757	trifluoperazine	10 µM	MCF7	0
1499	602	monorden	100 nM	HL60	0
1500	737	harmalol	15 µM	MCF7	0
1501	626	wortmannin	10 nM	MCF7	0
1502	751	myosmine	27 µM	MCF7	0
1503	651	hexylcaine	13 µM	HL60	0
1504	613	lynestrenol	14 µM	HL60	0
1505	692	sulfathiazole	16 µM	PC3	0
1506	648	tetryzoline	17 µM	HL60	0
1507	1059	PF-00562151-00	10 µM	MCF7	0
1508	728	labetalol	11 µM	PC3	0
1509	707	prochlorperazine	7 µM	MCF7	0
1510	647	clofazimine	8 µM	MCF7	0
1511	751	chlorcyclizine	12 µM	MCF7	0
1512	514	BW-B70C	32 µM	MCF7	0
1513	41	tretinoin	1 µM	HL60	0
1514	673	digoxigenin	10 µM	MCF7	0
1515	649	sulfadimethoxine	13 µM	HL60	0
1516	68	haloperidol	10 µM	MCF7	0
1517	685	sulfamethoxypyridazine	14 µM	MCF7	0
1518	714	amikacin	7 µM	PC3	0
1519	623	dobutamine	12 µM	HL60	0
1520	657	clorsulon	11 µM	MCF7	0
1521	633	ampicillin	10 µM	MCF7	0
1522	506	thioridazine	10 µM	MCF7	0
1523	670	guanadrel	8 µM	MCF7	0
1524	641	vinburnine	14 µM	HL60	0
1525	694	mebhydrolin	5 µM	MCF7	0
1526	632	sulfaguanidine	19 µM	MCF7	0
1527	686	dicoumarol	12 µM	MCF7	0
1528	671	doxycycline	8 µM	MCF7	0
1529	656	methoxamine	16 µM	MCF7	0
1530	660	megestrol	10 µM	HL60	0
1531	692	conessine	11 µM	PC3	0
1532	642	fenbufen	16 µM	MCF7	0
1533	637	iproniazid	14 µM	MCF7	0
1534	766	etamivan	18 µM	MCF7	0
1535	1067	colforsin	500 nM	PC3	0
1536	693	cyclobenzaprine	13 µM	PC3	0
1537	744	estropipate	9 µM	MCF7	0
1538	744	iopromide	5 µM	MCF7	0
1539	726	timolol	9 µM	MCF7	0
1540	741	lincomycin	9 µM	MCF7	0
1541	506	sirolimus	100 nM	MCF7	0
1542	671	iopamidol	5 µM	MCF7	0
1543	655	hexetidine	12 µM	MCF7	0
1544	706	glimepiride	8 µM	MCF7	0
1545	615	ranitidine	11 µM	HL60	0
1546	767	clozapine	10 µM	MCF7	0
1547	764	cefapirin	9 µM	PC3	0
1548	772	methocarbamol	17 µM	MCF7	0
1549	709	harpagoside	8 µM	PC3	0
1550	735	carbimazole	21 µM	MCF7	0
1551	641	(+)-chelidonine	11 µM	HL60	0
1552	737	gemfibrozil	16 µM	MCF7	0
1553	754	alverine	8 µM	PC3	0
1554	738	scoulerine	12 µM	MCF7	0
1555	680	monensin	6 µM	PC3	0
1556	1032	PHA-00767505E	10 µM	PC3	0
1557	738	flumequine	15 µM	MCF7	0
1558	632	tolazoline	20 µM	MCF7	0
1559	665	ozagrel	15 µM	HL60	0
1560	112	W-13	10 µM	MCF7	0
1561	682	sulfadimidine	13 µM	PC3	0
1562	623	amikacin	7 µM	HL60	0
1563	737	torasemide	11 µM	MCF7	0
1564	688	amiloride	13 µM	PC3	0
1565	660	nimodipine	10 µM	HL60	0
1566	603	sirolimus	100 nM	PC3	0
1567	741	moracizine	9 µM	MCF7	0
1568	623	cefoperazone	6 µM	HL60	0
1569	709	theobromine	22 µM	PC3	0
1570	744	sulfanilamide	23 µM	MCF7	0
1571	627	sulfadiazine	16 µM	MCF7	0
1572	698	merbromin	5 µM	PC3	0
1573	752	propidium iodide	6 µM	MCF7	0
1574	704	iocetamic acid	7 µM	PC3	0
1575	736	ranitidine	11 µM	MCF7	0
1576	651	corbadrine	22 µM	HL60	0
1577	661	adipiodone	4 µM	HL60	0
1578	761	naftifine	12 µM	PC3	0
1579	681	foliosidine	13 µM	PC3	0
1580	602	tretinoin	1 µM	HL60	0
1581	718	isometheptene	8 µM	PC3	0
1582	731	tranexamic acid	25 µM	PC3	0
1583	1004	PF-00875133-00	10 µM	MCF7	0
1584	664	cyclopenthiazide	11 µM	HL60	0
1585	715	chlortetracycline	8 µM	PC3	0
1586	755	meglumine	20 µM	MCF7	0
1587	657	scoulerine	12 µM	MCF7	0
1588	686	benfotiamine	9 µM	MCF7	0
1589	622	trichostatin A	100 nM	HL60	0
1590	689	tenoxicam	12 µM	PC3	0
1591	719	cyclic adenosine monophosphate	12 µM	PC3	0
1592	751	trichostatin A	100 nM	MCF7	0
1593	660	dexibuprofen	19 µM	HL60	0
1594	634	biperiden	11 µM	HL60	0
1595	640	propafenone	11 µM	HL60	0
1596	726	aciclovir	18 µM	MCF7	0
1597	640	chloroquine	8 µM	HL60	0
1598	685	PNU-0230031	1 µM	MCF7	0
1599	632	thioridazine	10 µM	MCF7	0
1600	681	myosmine	27 µM	PC3	0
1601	22a	fludrocortisone	1 µM	MCF7	0
1602	757	clozapine	10 µM	MCF7	0
1603	613	metanephrine	17 µM	HL60	0
1604	698	monensin	6 µM	PC3	0
1605	612	cimetidine	16 µM	HL60	0
1606	727	estradiol	100 nM	PC3	0
1607	1003	PF-00562151-00	10 µM	PC3	0
1608	658	nafcillin	9 µM	HL60	0
1609	732	propidium iodide	6 µM	PC3	0
1610	731	(+)-chelidonine	11 µM	PC3	0
1611	718	torasemide	11 µM	PC3	0
1612	622	clonidine	15 µM	HL60	0
1613	1094	trichostatin A	1 µM	MCF7	0
1614	727	acetylsalicylic acid	100 µM	PC3	0
1615	673	dimethadione	31 µM	MCF7	0
1616	712	vanoxerine	8 µM	PC3	0
1617	653	cefalexin	11 µM	MCF7	0
1618	733	nalbuphine	10 µM	PC3	0
1619	649	calcium folinate	8 µM	HL60	0
1620	714	paclitaxel	5 µM	PC3	0
1621	706	oxolamine	9 µM	MCF7	0
1622	687	2,6-dimethylpiperidine	27 µM	MCF7	0
1623	692	epitiostanol	13 µM	PC3	0
1624	649	thiamazole	35 µM	HL60	0
1625	671	mevalolactone	31 µM	MCF7	0
1626	641	calycanthine	12 µM	HL60	0
1627	745	pheneticillin	10 µM	MCF7	0
1628	647	vanoxerine	8 µM	MCF7	0
1629	622	guanethidine	13 µM	HL60	0
1630	504	5252917	14 µM	MCF7	0
1631	735	pralidoxime	23 µM	MCF7	0
1632	650	estradiol	100 nM	HL60	0
1633	31	sodium phenylbutyrate	100 µM	MCF7	0
1634	755	promethazine	12 µM	MCF7	0
1635	737	piracetam	28 µM	MCF7	0
1636	633	edrophonium chloride	20 µM	MCF7	0
1637	634	nitrofural	20 µM	HL60	0
1638	661	tiletamine	15 µM	HL60	0
1639	1048	fulvestrant	1 µM	PC3	0
1640	678	oxedrine	24 µM	MCF7	0
1641	648	cefmetazole	8 µM	HL60	0
1642	749	(-)-isoprenaline	16 µM	HL60	0
1643	53	thioridazine	1 µM	MCF7	0
1644	691	tenoxicam	12 µM	MCF7	0
1645	631	carbarsone	15 µM	HL60	0
1646	664	alprostadil	11 µM	HL60	0
1647	741	diphenhydramine	14 µM	MCF7	0
1648	688	tolazamide	13 µM	PC3	0
1649	748	quipazine	9 µM	MCF7	0
1650	753	hexetidine	12 µM	PC3	0
1651	634	dinoprost	8 µM	HL60	0
1652	642	dantrolene	12 µM	MCF7	0
1653	707	maprotiline	13 µM	MCF7	0
1654	736	10-methoxyharmalan	19 µM	MCF7	0
1655	513	troglitazone	10 µM	MCF7	0
1656	663	salsolinol	15 µM	MCF7	0
1657	734	ramifenazone	14 µM	PC3	0
1658	648	hexestrol	15 µM	HL60	0
1659	726	lorglumide	8 µM	MCF7	0
1660	654	cefixime	9 µM	MCF7	0
1661	671	sulfamonomethoxine	14 µM	MCF7	0
1662	671	carbinoxamine	10 µM	MCF7	0
1663	658	(+/-)-catechin	14 µM	HL60	0
1664	694	zalcitabine	19 µM	MCF7	0
1665	645	methylbenzethonium chloride	9 µM	HL60	0
1666	766	isoxicam	12 µM	MCF7	0
1667	687	lithocholic acid	11 µM	MCF7	0
1668	614	cefotaxime	8 µM	HL60	0
1669	673	thioperamide	10 µM	MCF7	0
1670	506	troglitazone	10 µM	MCF7	0
1671	94	bucladesine	20 µM	MCF7	0
1672	688	benzathine benzylpenicillin	4 µM	PC3	0
1673	744	zomepirac	13 µM	MCF7	0
1674	734	cefmetazole	8 µM	PC3	0
1675	641	quipazine	9 µM	HL60	0
1676	709	harmaline	14 µM	PC3	0
1677	647	colchicine	10 µM	MCF7	0
1678	719	sulindac	11 µM	PC3	0
1679	715	zaprinast	15 µM	PC3	0
1680	767	LY-294002	100 nM	MCF7	0
1681	700	diphenylpyraline	13 µM	MCF7	0
1682	660	terguride	12 µM	HL60	0
1683	755	aminohippuric acid	21 µM	MCF7	0
1684	640	raubasine	10 µM	HL60	0
1685	711	vincamine	11 µM	MCF7	0
1686	660	butyl hydroxybenzoate	21 µM	HL60	0
1687	662	folic acid	9 µM	MCF7	0
1688	642	prilocaine	16 µM	MCF7	0
1689	755	desoxycortone	12 µM	MCF7	0
1690	1087	IC-86621	1 µM	PC3	0
1691	44	sodium phenylbutyrate	1 mM	HL60	0
1692	752	butamben	21 µM	MCF7	0
1693	633	danazol	12 µM	MCF7	0
1694	718	ceftazidime	6 µM	PC3	0
1695	636	midodrine	14 µM	MCF7	0
1696	686	bendroflumethiazide	9 µM	MCF7	0
1697	729	nitrofural	20 µM	MCF7	0
1698	713	probucol	8 µM	PC3	0
1699	651	ebselen	15 µM	HL60	0
1700	756	ketorolac	11 µM	MCF7	0
1701	614	dizocilpine	12 µM	HL60	0
1702	757	trichostatin A	1 µM	MCF7	0
1703	648	nadide	6 µM	HL60	0
1704	702	ethisterone	13 µM	PC3	0
1705	504	ikarugamycin	2 µM	MCF7	0
1706	1015	sirolimus	100 nM	PC3	0
1707	725	LY-294002	10 µM	MCF7	0
1708	681	hydralazine	20 µM	PC3	0
1709	682	0317956-0000	1 µM	PC3	0
1710	22a	fludrocortisone	1 µM	MCF7	0
1711	649	glycopyrronium bromide	10 µM	HL60	0
1712	686	piperacillin	7 µM	MCF7	0
1713	699	levomepromazine	9 µM	MCF7	0
1714	633	azacyclonol	15 µM	MCF7	0
1715	758	latamoxef	7 µM	MCF7	0
1716	725	troglitazone	10 µM	MCF7	0
1717	682	mexiletine	19 µM	PC3	0
1718	630	ritodrine	12 µM	HL60	0
1719	641	atropine	6 µM	HL60	0
1720	756	isometheptene	8 µM	MCF7	0
1721	719	adipiodone	4 µM	PC3	0
1722	725	fluphenazine	10 µM	MCF7	0
1723	633	naloxone	11 µM	MCF7	0
1724	749	chloropyrazine	35 µM	HL60	0
1725	686	acacetin	14 µM	MCF7	0
1726	709	protoveratrine A	5 µM	PC3	0
1727	650	tretinoin	1 µM	HL60	0
1728	699	tiapride	11 µM	MCF7	0
1729	698	guanadrel	8 µM	PC3	0
1730	682	vincamine	11 µM	PC3	0
1731	690	oxamniquine	14 µM	MCF7	0
1732	671	amrinone	21 µM	MCF7	0
1733	745	(+)-chelidonine	11 µM	MCF7	0
1734	737	hydrastinine	16 µM	MCF7	0
1735	631	N-acetyl-L-aspartic acid	23 µM	HL60	0
1736	633	baclofen	19 µM	MCF7	0
1737	726	3-hydroxy-DL-kynurenine	18 µM	MCF7	0
1738	632	ticlopidine	13 µM	MCF7	0
1739	654	lactobionic acid	11 µM	MCF7	0
1740	737	pivampicillin	9 µM	MCF7	0
1741	633	guanabenz	14 µM	MCF7	0
1742	752	pheneticillin	10 µM	MCF7	0
1743	741	Prestwick-1103	20 µM	MCF7	0
1744	690	etofenamate	11 µM	MCF7	0
1745	691	corticosterone	12 µM	MCF7	0
1746	635	lovastatin	10 µM	HL60	0
1747	691	tiaprofenic acid	15 µM	MCF7	0
1748	1049	STOCK1N-28457	20 µM	MCF7	0
1749	682	helveticoside	7 µM	PC3	0
1750	758	meclozine	9 µM	MCF7	0
1751	756	Prestwick-981	11 µM	MCF7	0
1752	629	isoflupredone	10 µM	HL60	0
1753	690	etifenin	12 µM	MCF7	0
1754	701	diphenylpyraline	13 µM	PC3	0
1755	757	genistein	10 µM	MCF7	0
1756	641	physostigmine	6 µM	HL60	0
1757	741	nifenazone	13 µM	MCF7	0
1758	615	etodolac	14 µM	HL60	0
1759	747	fendiline	11 µM	MCF7	0
1760	688	gramine	23 µM	PC3	0
1761	614	tetracycline	8 µM	HL60	0
1762	733	podophyllotoxin	10 µM	PC3	0
1763	767	alpha-estradiol	10 nM	MCF7	0
1764	622	terbutaline	7 µM	HL60	0
1765	744	altizide	10 µM	MCF7	0
1766	681	benzamil	11 µM	PC3	0
1767	719	hyoscyamine	14 µM	PC3	0
1768	694	meptazinol	15 µM	MCF7	0
1769	682	ethisterone	13 µM	PC3	0
1770	612	ticlopidine	13 µM	HL60	0
1771	755	prasterone	12 µM	MCF7	0
1772	632	sulpiride	12 µM	MCF7	0
1773	660	oxybenzone	18 µM	HL60	0
1774	631	N-acetylmuramic acid	14 µM	HL60	0
1775	682	lanatoside C	4 µM	PC3	0
1776	1023	F0447-0125	10 µM	PC3	0
1777	731	cefepime	7 µM	PC3	0
1778	673	eticlopride	11 µM	MCF7	0
1779	718	metformin	24 µM	PC3	0
1780	681	ketoprofen	16 µM	PC3	0
1781	663	sparteine	17 µM	MCF7	0
1782	681	phenformin	17 µM	PC3	0
1783	743	midodrine	14 µM	MCF7	0
1784	612	acebutolol	11 µM	HL60	0
1785	654	7-aminocephalosporanic acid	15 µM	MCF7	0
1786	685	diphenylpyraline	13 µM	MCF7	0
1787	659	primidone	18 µM	HL60	0
1788	1082	meteneprost	10 µM	MCF7	0
1789	741	ketorolac	11 µM	MCF7	0
1790	741	tiletamine	15 µM	MCF7	0
1791	641	convolamine	12 µM	HL60	0
1792	709	lovastatin	10 µM	PC3	0
1793	90	splitomicin	20 µM	PC3	0
1794	709	arcaine	15 µM	PC3	0
1795	744	terfenadine	8 µM	MCF7	0
1796	615	iproniazid	14 µM	HL60	0
1797	691	gelsemine	12 µM	MCF7	0
1798	677	penbutolol	6 µM	MCF7	0
1799	682	fludrocortisone	9 µM	PC3	0
1800	647	practolol	15 µM	MCF7	0
1801	690	cinchonine	14 µM	MCF7	0
1802	715	bisoprolol	9 µM	PC3	0
1803	659	eticlopride	11 µM	HL60	0
1804	771	doxepin	13 µM	MCF7	0
1805	622	furosemide	12 µM	HL60	0
1806	750	estradiol	10 nM	HL60	0
1807	738	cyclic adenosine monophosphate	12 µM	MCF7	0
1808	686	vincamine	11 µM	MCF7	0
1809	752	estropipate	9 µM	MCF7	0
1810	712	crotamiton	20 µM	PC3	0
1811	602	genistein	10 µM	HL60	0
1812	678	propoxycaine	12 µM	MCF7	0
1813	1027	erastin	20 µM	PC3	0
1814	736	proxymetacaine	12 µM	MCF7	0
1815	702	bendroflumethiazide	9 µM	PC3	0
1816	692	trimethylcolchicinic acid	12 µM	PC3	0
1817	660	etynodiol	10 µM	HL60	0
1818	715	nilutamide	13 µM	PC3	0
1819	630	fusidic acid	7 µM	HL60	0
1820	749	mephenytoin	18 µM	HL60	0
1821	1082	trichostatin A	1 µM	MCF7	0
1822	735	clopamide	12 µM	MCF7	0
1823	658	iodixanol	3 µM	HL60	0
1824	677	tridihexethyl	11 µM	MCF7	0
1825	737	pizotifen	9 µM	MCF7	0
1826	707	lisuride	12 µM	MCF7	0
1827	614	aminophenazone	17 µM	HL60	0
1828	702	helveticoside	7 µM	PC3	0
1829	772	penbutolol	6 µM	MCF7	0
1830	758	methyldopa	19 µM	MCF7	0
1831	615	oxymetazoline	13 µM	HL60	0
1832	659	propranolol	14 µM	HL60	0
1833	671	azlocillin	8 µM	MCF7	0
1834	53	trifluoperazine	10 µM	MCF7	0
1835	741	hydrastine hydrochloride	10 µM	MCF7	0
1836	654	meclocycline	6 µM	MCF7	0
1837	641	berberine	11 µM	HL60	0
1838	647	clopamide	12 µM	MCF7	0
1839	713	pentetic acid	10 µM	PC3	0
1840	772	thiamine	12 µM	MCF7	0
1841	645	pramocaine	12 µM	HL60	0
1842	693	emetine	7 µM	PC3	0
1843	706	SR-95639A	10 µM	MCF7	0
1844	649	trichostatin A	100 nM	HL60	0
1845	1014	sirolimus	100 nM	MCF7	0
1846	613	famotidine	12 µM	HL60	0
1847	1016	PF-01378883-00	10 µM	MCF7	0
1848	709	acebutolol	11 µM	PC3	0
1849	623	probucol	8 µM	HL60	0
1850	766	laudanosine	11 µM	MCF7	0
1851	622	bambuterol	10 µM	HL60	0
1852	38	tamoxifen	1 µM	ssMCF7	0
1853	700	metoclopramide	12 µM	MCF7	0
1854	19	dexamethasone	1 µM	MCF7	0
1855	683	CP-690334-01	1 µM	PC3	0
1856	726	digoxigenin	10 µM	MCF7	0
1857	726	clozapine	12 µM	MCF7	0
1858	629	dapsone	16 µM	HL60	0
1859	640	mometasone	8 µM	HL60	0
1860	660	prasterone	12 µM	HL60	0
1861	687	rifabutin	5 µM	MCF7	0
1862	22a	quercetin	1 µM	MCF7	0
1863	622	cinnarizine	11 µM	HL60	0
1864	662	isocorydine	12 µM	MCF7	0
1865	631	mebhydrolin	5 µM	HL60	0
1866	685	phenformin	17 µM	MCF7	0
1867	691	carteolol	12 µM	MCF7	0
1868	653	ketoconazole	8 µM	MCF7	0
1869	632	miconazole	10 µM	MCF7	0
1870	1066	SB-202190	1 µM	MCF7	0
1871	649	flecainide	8 µM	HL60	0
1872	743	anabasine	25 µM	MCF7	0
1873	671	iopromide	5 µM	MCF7	0
1874	738	pentetrazol	29 µM	MCF7	0
1875	647	metitepine	8 µM	MCF7	0
1876	737	mafenide	18 µM	MCF7	0
1877	691	thioridazine	10 µM	MCF7	0
1878	632	dicycloverine	12 µM	MCF7	0
1879	694	hydroxyachillin	14 µM	MCF7	0
1880	612	khellin	15 µM	HL60	0
1881	613	oleandomycin	5 µM	HL60	0
1882	731	chloropyrazine	35 µM	PC3	0
1883	708	vanoxerine	8 µM	MCF7	0
1884	614	trichostatin A	100 nM	HL60	0
1885	715	digoxin	5 µM	PC3	0
1886	714	mimosine	20 µM	PC3	0
1887	642	camptothecin	11 µM	MCF7	0
1888	673	propranolol	14 µM	MCF7	0
1889	731	mevalolactone	31 µM	PC3	0
1890	622	mebeverine	9 µM	HL60	0
1891	629	chlorpromazine	11 µM	HL60	0
1892	686	PHA-00851261E	10 µM	MCF7	0
1893	8	sulindac	100 µM	MCF7	0
1894	752	strophanthidin	10 µM	MCF7	0
1895	694	colistin	3 µM	MCF7	0
1896	683	CP-320650-01	10 µM	PC3	0
1897	695	cyclopenthiazide	11 µM	MCF7	0
1898	632	idoxuridine	11 µM	MCF7	0
1899	691	co-dergocrine mesilate	6 µM	MCF7	0
1900	727	sirolimus	100 nM	PC3	0
1901	631	carcinine	22 µM	HL60	0
1902	649	cefazolin	8 µM	HL60	0
1903	614	chlorphenamine	10 µM	HL60	0
1904	629	amitriptyline	13 µM	HL60	0
1905	686	methylbenzethonium chloride	9 µM	MCF7	0
1906	659	thioperamide	10 µM	HL60	0
1907	614	mianserin	13 µM	HL60	0
1908	642	trichostatin A	100 nM	MCF7	0
1909	758	pirenperone	10 µM	MCF7	0
1910	686	indapamide	11 µM	MCF7	0
1911	728	isocorydine	12 µM	PC3	0
1912	691	solanine	5 µM	MCF7	0
1913	1066	0316684-0000	10 µM	MCF7	0
1914	693	SR-95531	11 µM	PC3	0
1915	111	paclitaxel	100 nM	MCF7	0
1916	752	cefmetazole	8 µM	MCF7	0
1917	706	retrorsine	11 µM	MCF7	0
1918	658	chloropyramine	12 µM	HL60	0
1919	1	metformin	10 µM	MCF7	0
1920	648	leflunomide	15 µM	HL60	0
1921	700	flunixin	8 µM	MCF7	0
1922	700	flumetasone	10 µM	MCF7	0
1923	736	iopanoic acid	7 µM	MCF7	0
1924	692	nystatin	4 µM	PC3	0
1925	660	rolipram	15 µM	HL60	0
1926	758	haloperidol	11 µM	MCF7	0
1927	691	cinchocaine	12 µM	MCF7	0
1928	659	2-aminobenzenesulfonamide	23 µM	HL60	0
1929	743	trichostatin A	100 nM	MCF7	0
1930	633	perphenazine	10 µM	MCF7	0
1931	634	cefotiam	7 µM	HL60	0
1932	618	proglumide	12 µM	HL60	0
1933	735	amphotericin B	4 µM	MCF7	0
1934	630	cefalexin	11 µM	HL60	0
1935	635	pyrazinamide	32 µM	HL60	0
1936	671	butacaine	13 µM	MCF7	0
1937	744	isocorydine	12 µM	MCF7	0
1938	692	amantadine	10 µM	PC3	0
1939	731	ciprofibrate	14 µM	PC3	0
1940	619	lincomycin	9 µM	HL60	0
1941	727	fulvestrant	10 nM	PC3	0
1942	726	loperamide	8 µM	MCF7	0
1943	665	tribenoside	8 µM	HL60	0
1944	33	valproic acid	500 µM	MCF7	0
1945	726	thioperamide	10 µM	MCF7	0
1946	602	sirolimus	100 nM	HL60	0
1947	772	acetohexamide	12 µM	MCF7	0
1948	612	isoxsuprine	12 µM	HL60	0
1949	615	fenspiride	13 µM	HL60	0
1950	56	fasudil	10 µM	PC3	0
1951	700	isosorbide	17 µM	MCF7	0
1952	631	bacampicillin	8 µM	HL60	0
1953	641	cinchonidine	14 µM	HL60	0
1954	629	sulfadiazine	16 µM	HL60	0
1955	712	eticlopride	11 µM	PC3	0
1956	671	cicloheximide	14 µM	MCF7	0
1957	613	diltiazem	9 µM	HL60	0
1958	619	glafenine	10 µM	HL60	0
1959	653	pentoxyverine	8 µM	MCF7	0
1960	673	(+)-isoprenaline	11 µM	MCF7	0
1961	715	hemicholinium	7 µM	PC3	0
1962	752	phenazopyridine	16 µM	MCF7	0
1963	693	seneciphylline	12 µM	PC3	0
1964	644	galantamine	11 µM	HL60	0
1965	693	salsolidin	16 µM	PC3	0
1966	613	azathioprine	14 µM	HL60	0
1967	750	troglitazone	10 µM	HL60	0
1968	743	chlortalidone	12 µM	MCF7	0
1969	731	meprylcaine	15 µM	PC3	0
1970	665	procarbazine	16 µM	HL60	0
1971	623	sulfafurazole	15 µM	HL60	0
1972	744	stachydrine	22 µM	MCF7	0
1973	615	flufenamic acid	14 µM	HL60	0
1974	680	guanadrel	8 µM	PC3	0
1975	705	chloropyramine	12 µM	MCF7	0
1976	693	corynanthine	10 µM	PC3	0
1977	736	betazole	27 µM	MCF7	0
1978	619	flavoxate	9 µM	HL60	0
1979	657	iobenguane	11 µM	MCF7	0
1980	646	fendiline	11 µM	MCF7	0
1981	613	loxapine	9 µM	HL60	0
1982	633	verapamil	8 µM	MCF7	0
1983	683	Prestwick-1100	9 µM	PC3	0
1984	618	ketoprofen	16 µM	HL60	0
1985	749	Prestwick-1085	15 µM	HL60	0
1986	681	6-benzylaminopurine	18 µM	PC3	0
1987	612	doxylamine	10 µM	HL60	0
1988	661	alfadolone	10 µM	HL60	0
1989	612	amylocaine	15 µM	HL60	0
1990	662	demecarium bromide	6 µM	MCF7	0
1991	738	mometasone	8 µM	MCF7	0
1992	686	PHA-00851261E	1 µM	MCF7	0
1993	656	rifampicin	5 µM	MCF7	0
1994	736	sulfasalazine	10 µM	MCF7	0
1995	749	dorzolamide	11 µM	HL60	0
1996	653	3-hydroxy-DL-kynurenine	18 µM	MCF7	0
1997	689	xylazine	18 µM	PC3	0
1998	614	ampyrone	20 µM	HL60	0
[truncated: 4,102 more rows]

## Sheet: ST5
Supplementary Table 5: Connectivity Mapping Predicted Drug Responses in Lung Tumors from European Americans
rank	batch	cmap name	dose	cell	score
1	728	benzylpenicillin	11 µM	PC3	1
2	698	riluzole	15 µM	PC3	0.901
3	665	netilmicin	3 µM	HL60	0.879
4	703	tolbutamide	15 µM	PC3	0.875
5	714	ciprofloxacin	11 µM	PC3	0.874
6	704	vitexin	9 µM	PC3	0.861
7	728	(-)-isoprenaline	16 µM	PC3	0.836
8	646	streptomycin	3 µM	MCF7	0.796
9	751	lycorine	12 µM	MCF7	0.791
10	661	halofantrine	7 µM	HL60	0.783
11	703	fenbendazole	13 µM	PC3	0.782
12	699	mephentermine	9 µM	MCF7	0.778
13	728	hydrocotarnine	13 µM	PC3	0.775
14	628	benzonatate	7 µM	PC3	0.773
15	45	nordihydroguaiaretic acid	1 µM	ssMCF7	0.771
16	703	parbendazole	16 µM	PC3	0.767
17	702	helveticoside	7 µM	PC3	0.765
18	623	zaprinast	15 µM	HL60	0.763
19	690	amiprilose	12 µM	MCF7	0.761
20	670	calcium folinate	8 µM	MCF7	0.752
21	649	diethylstilbestrol	15 µM	HL60	0.752
22	705	diphemanil metilsulfate	10 µM	MCF7	0.751
23	1041	alprostadil	10 µM	MCF7	0.75
24	698	trimethoprim	14 µM	PC3	0.748
25	730	neostigmine bromide	13 µM	MCF7	0.743
26	655	ceforanide	8 µM	MCF7	0.74
27	703	diethylstilbestrol	15 µM	PC3	0.736
28	747	terazosin	9 µM	MCF7	0.736
29	678	tropine	28 µM	MCF7	0.736
30	720	lycorine	12 µM	MCF7	0.732
31	698	sulfamethoxazole	16 µM	PC3	0.73
32	1029	C-75	10 µM	PC3	0.729
33	762	Prestwick-1103	20 µM	PC3	0.729
34	686	0317956-0000	1 µM	MCF7	0.726
35	737	isometheptene	8 µM	MCF7	0.725
36	665	lansoprazole	11 µM	HL60	0.724
37	703	quinethazone	14 µM	PC3	0.723
38	761	disopyramide	12 µM	PC3	0.723
39	689	moxonidine	17 µM	PC3	0.721
40	702	lanatoside C	4 µM	PC3	0.721
41	705	lidocaine	15 µM	MCF7	0.72
42	753	esculin	12 µM	PC3	0.719
43	1046	PHA-00767505E	10 µM	PC3	0.719
44	1077	AR-A014418	10 µM	PC3	0.718
45	636	gentamicin	3 µM	MCF7	0.714
46	771	diethylcarbamazine	10 µM	MCF7	0.712
47	1094	meteneprost	10 µM	MCF7	0.712
48	665	Prestwick-1103	20 µM	HL60	0.712
49	514	12,13-EODE	200 nM	MCF7	0.711
50	678	thiethylperazine	6 µM	MCF7	0.711
51	678	cefepime	7 µM	MCF7	0.71
52	705	Prestwick-642	14 µM	MCF7	0.709
53	1040	Gly-His-Lys	1 µM	PC3	0.709
54	761	pergolide	10 µM	PC3	0.708
55	662	yohimbine	10 µM	MCF7	0.708
56	730	ceforanide	8 µM	MCF7	0.707
57	1040	alprostadil	10 µM	PC3	0.706
58	765	estradiol	10 nM	MCF7	0.703
59	704	etilefrine	18 µM	PC3	0.702
60	729	naftidrofuryl	8 µM	MCF7	0.7
61	699	Prestwick-665	12 µM	MCF7	0.699
62	627	atracurium besilate	3 µM	MCF7	0.698
63	715	N6-methyladenosine	14 µM	PC3	0.698
64	719	bumetanide	11 µM	PC3	0.698
65	671	securinine	18 µM	MCF7	0.693
66	687	tinidazole	16 µM	MCF7	0.693
67	676	zalcitabine	19 µM	MCF7	0.692
68	692	isoxsuprine	12 µM	PC3	0.685
69	746	demecarium bromide	6 µM	MCF7	0.684
70	633	baclofen	19 µM	MCF7	0.683
71	678	ramipril	10 µM	MCF7	0.682
72	694	gabexate	10 µM	MCF7	0.682
73	747	doxycycline	8 µM	MCF7	0.682
74	693	Prestwick-967	26 µM	PC3	0.68
75	632	amylocaine	15 µM	MCF7	0.68
76	771	bumetanide	11 µM	MCF7	0.68
77	632	captopril	17 µM	MCF7	0.679
78	673	xamoterol	5 µM	MCF7	0.679
79	705	naringenin	15 µM	MCF7	0.678
80	708	dimethadione	31 µM	MCF7	0.678
81	654	lactobionic acid	11 µM	MCF7	0.678
82	715	metanephrine	17 µM	PC3	0.677
83	730	ergocalciferol	10 µM	MCF7	0.677
84	654	Chicago Sky Blue 6B	4 µM	MCF7	0.676
85	686	PHA-00851261E	1 µM	MCF7	0.674
86	634	progesterone	13 µM	HL60	0.673
87	642	6-benzylaminopurine	18 µM	MCF7	0.671
88	703	oxaprozin	14 µM	PC3	0.671
89	706	arcaine	15 µM	MCF7	0.671
90	644	cinchonine	14 µM	HL60	0.668
91	663	yohimbic acid	11 µM	MCF7	0.668
92	688	carbarsone	15 µM	PC3	0.668
93	646	bambuterol	10 µM	MCF7	0.667
94	703	santonin	16 µM	PC3	0.667
95	708	felbinac	19 µM	MCF7	0.666
96	687	spiradoline	1 µM	MCF7	0.665
97	642	prilocaine	16 µM	MCF7	0.664
98	687	nialamide	13 µM	MCF7	0.662
99	642	vincamine	11 µM	MCF7	0.661
100	513	rosiglitazone	10 µM	MCF7	0.66
101	653	fusidic acid	7 µM	MCF7	0.66
102	711	dantrolene	12 µM	MCF7	0.658
103	676	fluticasone	8 µM	MCF7	0.658
104	756	ketorolac	11 µM	MCF7	0.657
105	745	tetracycline	8 µM	MCF7	0.655
106	678	mesalazine	26 µM	MCF7	0.655
107	649	furaltadone	11 µM	HL60	0.655
108	505	5186324	2 µM	MCF7	0.654
109	650	tretinoin	1 µM	HL60	0.654
110	647	chlormezanone	15 µM	MCF7	0.653
111	764	pyrithyldione	24 µM	PC3	0.653
112	703	lithocholic acid	11 µM	PC3	0.651
113	687	lycorine	12 µM	MCF7	0.65
114	694	diflunisal	16 µM	MCF7	0.649
115	709	Chicago Sky Blue 6B	4 µM	PC3	0.649
116	1081	15(S)-15-methylprostaglandin E2	10 µM	PC3	0.649
117	767	rosiglitazone	10 µM	MCF7	0.649
118	646	praziquantel	13 µM	MCF7	0.649
119	709	oxolamine	9 µM	PC3	0.649
120	707	benzbromarone	9 µM	MCF7	0.648
121	757	nordihydroguaiaretic acid	1 µM	MCF7	0.648
122	663	conessine	11 µM	MCF7	0.647
123	633	glipizide	9 µM	MCF7	0.646
124	761	Prestwick-972	23 µM	PC3	0.646
125	53	LY-294002	100 nM	MCF7	0.646
126	703	CP-320650-01	1 µM	PC3	0.646
127	772	ioxaglic acid	3 µM	MCF7	0.646
128	616	dizocilpine	12 µM	PC3	0.645
129	747	strophanthidin	10 µM	MCF7	0.644
130	771	acemetacin	10 µM	MCF7	0.644
131	693	orciprenaline	8 µM	PC3	0.643
132	728	furosemide	12 µM	PC3	0.643
133	1095	meteneprost	10 µM	PC3	0.64
134	738	sulfaphenazole	13 µM	MCF7	0.639
135	680	metaraminol	9 µM	PC3	0.639
136	734	nadide	6 µM	PC3	0.639
137	764	propoxycaine	12 µM	PC3	0.637
138	676	harpagoside	8 µM	MCF7	0.636
139	713	azathioprine	14 µM	PC3	0.636
140	705	ethionamide	24 µM	MCF7	0.636
141	686	PHA-00851261E	10 µM	MCF7	0.636
142	627	acetohexamide	12 µM	MCF7	0.635
143	704	paromomycin	6 µM	PC3	0.635
144	687	guaifenesin	20 µM	MCF7	0.634
145	672	spectinomycin	10 µM	MCF7	0.632
146	764	aconitine	6 µM	PC3	0.632
147	1014	pioglitazone	10 µM	MCF7	0.632
148	626	haloperidol	10 µM	MCF7	0.631
149	694	digitoxigenin	11 µM	MCF7	0.631
150	670	diethylstilbestrol	15 µM	MCF7	0.631
151	705	bacampicillin	8 µM	MCF7	0.631
152	698	isocarboxazid	17 µM	PC3	0.631
153	766	thiamphenicol	11 µM	MCF7	0.63
154	703	thiamazole	35 µM	PC3	0.63
155	690	sulmazole	14 µM	MCF7	0.629
156	689	sitosterol	10 µM	PC3	0.629
157	677	prednicarbate	8 µM	MCF7	0.629
158	619	bupivacaine	12 µM	HL60	0.628
159	1075	PHA-00846566E	10 µM	PC3	0.627
160	730	xamoterol	5 µM	MCF7	0.627
161	603	estradiol	10 nM	PC3	0.627
162	647	probucol	8 µM	MCF7	0.627
163	704	naringenin	15 µM	PC3	0.626
164	741	ribavirin	16 µM	MCF7	0.625
165	733	cefotaxime	8 µM	PC3	0.625
166	635	atovaquone	11 µM	HL60	0.625
167	729	ambroxol	10 µM	MCF7	0.624
168	662	convolamine	12 µM	MCF7	0.624
169	702	sulfachlorpyridazine	14 µM	PC3	0.624
170	706	methoxamine	16 µM	MCF7	0.624
171	699	cefazolin	8 µM	MCF7	0.623
172	733	isoniazid	29 µM	PC3	0.623
173	743	cefapirin	9 µM	MCF7	0.623
174	747	isoniazid	29 µM	MCF7	0.622
175	676	3-acetamidocoumarin	20 µM	MCF7	0.622
176	702	deferoxamine	6 µM	PC3	0.622
177	663	Prestwick-692	7 µM	MCF7	0.622
178	1005	PF-00875133-00	10 µM	PC3	0.621
179	647	clenbuterol	13 µM	MCF7	0.62
180	691	metrizamide	5 µM	MCF7	0.62
181	706	glimepiride	8 µM	MCF7	0.62
182	728	piretanide	11 µM	PC3	0.619
183	720	citalopram	1 µM	MCF7	0.619
184	761	isoxicam	12 µM	PC3	0.619
185	699	sulfadimethoxine	13 µM	MCF7	0.619
186	747	iopamidol	5 µM	MCF7	0.618
187	628	homatropine	11 µM	PC3	0.617
188	633	hydroxyzine	9 µM	MCF7	0.617
189	701	finasteride	11 µM	PC3	0.616
190	709	protoveratrine A	5 µM	PC3	0.616
191	694	amantadine	10 µM	MCF7	0.615
192	728	diperodon	9 µM	PC3	0.615
193	754	iproniazid	14 µM	PC3	0.615
194	1095	BCB000040	10 µM	PC3	0.615
195	617	mefexamide	13 µM	PC3	0.614
196	751	Prestwick-675	10 µM	MCF7	0.614
197	654	cyanocobalamin	3 µM	MCF7	0.614
198	514	minocycline	11 µM	MCF7	0.614
199	766	meclofenamic acid	12 µM	MCF7	0.613
200	737	dapsone	16 µM	MCF7	0.613
201	683	paroxetine	1 µM	PC3	0.613
202	603	sirolimus	100 nM	PC3	0.612
203	731	ricinine	24 µM	PC3	0.612
204	693	amprolium	13 µM	PC3	0.611
205	676	fursultiamine	9 µM	MCF7	0.611
206	670	guanadrel	8 µM	MCF7	0.61
207	672	arcaine	15 µM	MCF7	0.609
208	686	0317956-0000	10 µM	MCF7	0.609
209	691	myricetin	13 µM	MCF7	0.608
210	646	lidoflazine	8 µM	MCF7	0.608
211	514	DL-PPMP	2 µM	MCF7	0.608
212	699	isocarboxazid	17 µM	MCF7	0.608
213	651	cefapirin	9 µM	HL60	0.607
214	689	metacycline	8 µM	PC3	0.606
215	120	estradiol	10 nM	HL60	0.606
216	731	cefepime	7 µM	PC3	0.605
217	633	aciclovir	18 µM	MCF7	0.605
218	513	genistein	10 µM	MCF7	0.604
219	619	disopyramide	12 µM	HL60	0.604
220	699	calcium folinate	8 µM	MCF7	0.603
221	628	dexpanthenol	19 µM	PC3	0.603
222	505	topiramate	3 µM	MCF7	0.603
223	676	methyldopate	15 µM	MCF7	0.603
224	749	verteporfin	3 µM	HL60	0.602
225	692	probenecid	14 µM	PC3	0.601
226	772	cloxacillin	9 µM	MCF7	0.601
227	702	0317956-0000	10 µM	PC3	0.6
228	633	ampicillin	10 µM	MCF7	0.6
229	685	metoclopramide	12 µM	MCF7	0.599
230	731	calycanthine	12 µM	PC3	0.599
231	741	Prestwick-1103	20 µM	MCF7	0.598
232	695	letrozole	14 µM	MCF7	0.598
233	676	zardaverine	15 µM	MCF7	0.598
234	633	naloxone	11 µM	MCF7	0.597
235	709	khellin	15 µM	PC3	0.597
236	681	heliotrine	13 µM	PC3	0.596
237	636	ampyrone	20 µM	MCF7	0.596
238	761	levocabastine	9 µM	PC3	0.596
239	757	wortmannin	10 nM	MCF7	0.594
240	1024	PF-01378883-00	10 µM	MCF7	0.594
241	699	pentolonium	7 µM	MCF7	0.593
242	713	serotonin	19 µM	PC3	0.593
243	731	terbutaline	7 µM	PC3	0.592
244	654	carisoprodol	15 µM	MCF7	0.592
245	752	sulfaquinoxaline	12 µM	MCF7	0.592
246	661	trapidil	19 µM	HL60	0.592
247	505	5186223	12 µM	MCF7	0.592
248	704	3-acetamidocoumarin	20 µM	PC3	0.592
249	741	pivmecillinam	8 µM	MCF7	0.591
250	703	Prestwick-1080	15 µM	PC3	0.591
251	730	cefotiam	7 µM	MCF7	0.591
252	670	sulfadimethoxine	13 µM	MCF7	0.591
253	634	ergocalciferol	10 µM	HL60	0.59
254	657	ajmaline	12 µM	MCF7	0.59
255	641	harmine	16 µM	HL60	0.59
256	1038	16,16-dimethylprostaglandin E2	10 µM	PC3	0.59
257	673	nizatidine	12 µM	MCF7	0.589
258	728	altizide	10 µM	PC3	0.589
259	729	tacrine	16 µM	MCF7	0.588
260	689	selegiline	18 µM	PC3	0.588
261	687	Prestwick-1080	15 µM	MCF7	0.588
262	657	harmol	16 µM	MCF7	0.587
263	735	vigabatrin	31 µM	MCF7	0.587
264	645	methylbenzethonium chloride	9 µM	HL60	0.586
265	746	butamben	21 µM	MCF7	0.586
266	737	tridihexethyl	11 µM	MCF7	0.586
267	45	estradiol	10 nM	ssMCF7	0.584
268	646	ketotifen	9 µM	MCF7	0.584
269	766	viomycin	5 µM	MCF7	0.583
270	681	demeclocycline	8 µM	PC3	0.582
271	728	pipenzolate bromide	9 µM	PC3	0.582
272	748	bambuterol	10 µM	MCF7	0.581
273	683	CP-320650-01	1 µM	PC3	0.581
274	741	gliquidone	8 µM	MCF7	0.58
275	676	memantine	19 µM	MCF7	0.58
276	602	fulvestrant	10 nM	HL60	0.579
277	505	5140203	15 µM	MCF7	0.579
278	765	wortmannin	10 nM	MCF7	0.579
279	710	lisuride	12 µM	PC3	0.578
280	741	triamterene	16 µM	MCF7	0.577
281	706	oxolamine	9 µM	MCF7	0.577
282	653	estradiol	15 µM	MCF7	0.577
283	650	rosiglitazone	10 µM	HL60	0.577
284	750	LY-294002	10 µM	HL60	0.576
285	676	etilefrine	18 µM	MCF7	0.576
286	747	ketotifen	9 µM	MCF7	0.576
287	646	furosemide	12 µM	MCF7	0.576
288	661	pizotifen	9 µM	HL60	0.575
289	703	CP-320650-01	10 µM	PC3	0.575
290	719	flucloxacillin	8 µM	PC3	0.574
291	710	estrone	15 µM	PC3	0.573
292	707	dicloxacillin	8 µM	MCF7	0.573
293	672	carbenoxolone	7 µM	MCF7	0.572
294	710	ouabain	5 µM	PC3	0.572
295	756	scopoletin	21 µM	MCF7	0.572
296	726	digoxigenin	10 µM	MCF7	0.571
297	743	naproxen	16 µM	MCF7	0.57
298	95	arachidonyltrifluoromethane	10 µM	MCF7	0.57
299	677	quinpirole	16 µM	MCF7	0.57
300	1038	STOCK1N-35696	15 µM	PC3	0.569
301	673	felbinac	19 µM	MCF7	0.569
302	692	epitiostanol	13 µM	PC3	0.568
303	632	minoxidil	19 µM	MCF7	0.566
304	752	cefmetazole	8 µM	MCF7	0.566
305	747	sulfamonomethoxine	14 µM	MCF7	0.566
306	751	citiolone	25 µM	MCF7	0.566
307	661	bacitracin	3 µM	HL60	0.566
308	1047	5194442	20 µM	MCF7	0.566
309	719	cyclizine	13 µM	PC3	0.565
310	603	nordihydroguaiaretic acid	1 µM	PC3	0.565
311	633	josamycin	5 µM	MCF7	0.565
312	691	trimethobenzamide	9 µM	MCF7	0.564
313	647	zaprinast	15 µM	MCF7	0.564
314	689	alprostadil	11 µM	PC3	0.564
315	691	4-hydroxyphenazone	20 µM	MCF7	0.564
316	693	fosfosal	18 µM	PC3	0.563
317	619	chenodeoxycholic acid	10 µM	HL60	0.563
318	673	aminophylline	10 µM	MCF7	0.562
319	670	levomepromazine	9 µM	MCF7	0.562
320	741	moracizine	9 µM	MCF7	0.561
321	705	captopril	17 µM	MCF7	0.561
322	732	tropine	28 µM	PC3	0.561
323	698	atractyloside	5 µM	PC3	0.561
324	514	phentolamine	12 µM	MCF7	0.56
325	654	carcinine	22 µM	MCF7	0.56
326	662	noscapine	10 µM	MCF7	0.56
327	753	dobutamine	12 µM	PC3	0.56
328	693	piperine	14 µM	PC3	0.56
329	648	sulfaquinoxaline	12 µM	HL60	0.559
330	747	folic acid	9 µM	MCF7	0.558
331	683	alpha-ergocryptine	7 µM	PC3	0.558
332	750	fulvestrant	10 nM	HL60	0.558
333	754	acemetacin	10 µM	PC3	0.557
334	710	(+)-isoprenaline	11 µM	PC3	0.556
335	640	harmol	16 µM	HL60	0.555
336	616	tranexamic acid	25 µM	PC3	0.555
337	690	trihexyphenidyl	12 µM	MCF7	0.553
338	673	ioversol	5 µM	MCF7	0.553
339	688	rifampicin	5 µM	PC3	0.553
340	636	aminophenazone	17 µM	MCF7	0.553
341	627	naproxen	17 µM	MCF7	0.553
342	654	carteolol	12 µM	MCF7	0.552
343	729	diclofenamide	13 µM	MCF7	0.552
344	757	tanespimycin	1 µM	MCF7	0.551
345	626	estradiol	10 nM	MCF7	0.551
346	67	iloprost	1 µM	MCF7	0.55
347	1081	CP-319743	10 µM	PC3	0.55
348	731	mevalolactone	31 µM	PC3	0.55
349	767	haloperidol	10 µM	MCF7	0.549
350	630	domperidone	7 µM	HL60	0.549
351	754	naproxen	17 µM	PC3	0.549
352	731	ciprofibrate	14 µM	PC3	0.549
353	707	bemegride	26 µM	MCF7	0.548
354	745	cyclopentolate	12 µM	MCF7	0.548
355	680	Prestwick-675	10 µM	PC3	0.548
356	676	oxamniquine	14 µM	MCF7	0.547
357	713	sulfafurazole	15 µM	PC3	0.547
358	735	baclofen	19 µM	MCF7	0.547
359	688	N-acetyl-L-aspartic acid	23 µM	PC3	0.547
360	691	levothyroxine sodium	5 µM	MCF7	0.547
361	688	mycophenolic acid	12 µM	PC3	0.546
362	709	Prestwick-857	12 µM	PC3	0.546
363	633	paclitaxel	5 µM	MCF7	0.546
364	661	isometheptene	8 µM	HL60	0.545
365	690	memantine	19 µM	MCF7	0.545
366	683	phenelzine	17 µM	PC3	0.545
367	673	pentetic acid	10 µM	MCF7	0.545
368	771	enalapril	8 µM	MCF7	0.545
369	688	brompheniramine	9 µM	PC3	0.544
370	725	haloperidol	10 µM	MCF7	0.543
371	686	mexiletine	19 µM	MCF7	0.543
372	735	nimodipine	10 µM	MCF7	0.543
373	610	lidocaine	15 µM	PC3	0.542
374	761	clorsulon	11 µM	PC3	0.542
375	663	Prestwick-682	6 µM	MCF7	0.542
376	707	bretylium tosilate	10 µM	MCF7	0.541
377	700	heliotrine	13 µM	MCF7	0.541
378	685	ketoprofen	16 µM	MCF7	0.54
379	705	chloropyramine	12 µM	MCF7	0.54
380	733	meropenem	10 µM	PC3	0.54
381	635	ethionamide	24 µM	HL60	0.54
382	505	decitabine	100 nM	MCF7	0.539
383	744	estropipate	9 µM	MCF7	0.538
384	688	ethambutol	14 µM	PC3	0.538
385	685	myosmine	27 µM	MCF7	0.538
386	733	iopamidol	5 µM	PC3	0.537
387	611	guanabenz	14 µM	PC3	0.537
388	602	troglitazone	10 µM	HL60	0.536
389	701	karakoline	11 µM	PC3	0.535
390	38	dexamethasone	1 µM	ssMCF7	0.535
391	505	5162773	7 µM	MCF7	0.535
392	628	chloramphenicol	12 µM	PC3	0.535
393	767	estradiol	10 nM	MCF7	0.534
394	747	diazoxide	17 µM	MCF7	0.534
395	6	chlorpropamide	100 µM	MCF7	0.533
396	745	calycanthine	12 µM	MCF7	0.533
397	677	Prestwick-1083	9 µM	MCF7	0.533
398	715	hemicholinium	7 µM	PC3	0.533
399	703	CP-690334-01	1 µM	PC3	0.532
400	714	florfenicol	11 µM	PC3	0.532
401	699	merbromin	5 µM	MCF7	0.531
402	634	velnacrine	12 µM	HL60	0.531
403	36	pirinixic acid	100 µM	MCF7	0.531
404	648	butamben	21 µM	HL60	0.529
405	38	estradiol	10 nM	ssMCF7	0.529
406	645	helveticoside	7 µM	HL60	0.529
407	730	erythromycin	5 µM	MCF7	0.529
408	711	PHA-00851261E	10 µM	MCF7	0.528
409	5	estradiol	10 nM	MCF7	0.528
410	705	vancomycin	3 µM	MCF7	0.528
411	626	genistein	10 µM	MCF7	0.528
412	628	todralazine	15 µM	PC3	0.528
413	703	trichostatin A	100 nM	PC3	0.528
414	627	dapsone	16 µM	MCF7	0.527
415	720	PHA-00745360	1 µM	MCF7	0.527
416	656	R-atenolol	15 µM	MCF7	0.527
417	636	tranexamic acid	25 µM	MCF7	0.527
418	648	sulfamethizole	15 µM	HL60	0.527
419	636	mianserin	13 µM	MCF7	0.527
420	21	genistein	1 µM	MCF7	0.527
421	671	mevalolactone	31 µM	MCF7	0.527
422	661	denatonium benzoate	9 µM	HL60	0.526
423	745	tetrahydroalstonine	11 µM	MCF7	0.526
424	112	benserazide	10 µM	MCF7	0.526
425	733	diazoxide	17 µM	PC3	0.525
426	514	yohimbine	23 µM	MCF7	0.525
427	637	cloxacillin	9 µM	MCF7	0.524
428	513	estradiol	10 nM	MCF7	0.524
429	771	dimenhydrinate	9 µM	MCF7	0.524
430	681	Prestwick-664	8 µM	PC3	0.523
431	1008	rotenone	1 µM	MCF7	0.523
432	737	niflumic acid	14 µM	MCF7	0.523
433	58	novobiocin	100 µM	MCF7	0.523
434	711	mexiletine	19 µM	MCF7	0.523
435	751	foliosidine	13 µM	MCF7	0.522
436	673	diloxanide	12 µM	MCF7	0.521
437	693	7-aminocephalosporanic acid	15 µM	PC3	0.52
438	657	iobenguane	11 µM	MCF7	0.52
439	733	cinnarizine	11 µM	PC3	0.52
440	645	sulfamerazine	15 µM	HL60	0.52
441	96	MK-886	1 µM	MCF7	0.52
442	729	debrisoquine	9 µM	MCF7	0.52
443	738	bumetanide	11 µM	MCF7	0.519
444	619	fenofibrate	11 µM	HL60	0.519
445	690	metronidazole	23 µM	MCF7	0.519
446	672	indoprofen	14 µM	MCF7	0.519
447	734	bergenin	12 µM	PC3	0.519
448	677	bethanechol	20 µM	MCF7	0.519
449	636	clindamycin	9 µM	MCF7	0.518
450	689	carbenoxolone	7 µM	PC3	0.518
451	718	trimetazidine	12 µM	PC3	0.518
452	743	isopropamide iodide	8 µM	MCF7	0.518
453	731	dienestrol	15 µM	PC3	0.517
454	673	digoxigenin	10 µM	MCF7	0.517
455	693	dydrogesterone	13 µM	PC3	0.517
456	735	melatonin	17 µM	MCF7	0.517
457	695	fosfosal	18 µM	MCF7	0.516
458	718	mafenide	18 µM	PC3	0.516
459	709	retrorsine	11 µM	PC3	0.515
460	720	parbendazole	16 µM	MCF7	0.515
461	695	indoprofen	14 µM	MCF7	0.515
462	677	Prestwick-1103	20 µM	MCF7	0.514
463	660	idazoxan	17 µM	HL60	0.514
464	765	genistein	10 µM	MCF7	0.513
465	756	Prestwick-981	11 µM	MCF7	0.513
466	678	chloropyrazine	35 µM	MCF7	0.513
467	731	tetracycline	8 µM	PC3	0.512
468	644	harman	18 µM	HL60	0.512
469	747	cefotaxime	8 µM	MCF7	0.512
470	733	terazosin	9 µM	PC3	0.511
471	689	4-hydroxyphenazone	20 µM	PC3	0.511
472	733	isoetarine	12 µM	PC3	0.51
473	736	naproxen	17 µM	MCF7	0.509
474	645	Prestwick-675	10 µM	HL60	0.509
475	702	flecainide	8 µM	PC3	0.509
476	725	clozapine	10 µM	MCF7	0.509
477	617	iproniazid	14 µM	PC3	0.509
478	699	ofloxacin	11 µM	MCF7	0.508
479	704	novobiocin	6 µM	PC3	0.507
480	747	streptomycin	3 µM	MCF7	0.507
481	619	bumetanide	11 µM	HL60	0.507
482	738	flucloxacillin	8 µM	MCF7	0.507
483	602	valproic acid	50 µM	HL60	0.507
484	706	naphazoline	16 µM	MCF7	0.507
485	611	edrophonium chloride	20 µM	PC3	0.506
486	744	pindolol	16 µM	MCF7	0.506
487	676	gibberellic acid	12 µM	MCF7	0.505
488	619	enalapril	8 µM	HL60	0.504
489	744	sulfanilamide	23 µM	MCF7	0.504
490	655	pilocarpine	15 µM	MCF7	0.504
491	644	bicuculline	11 µM	HL60	0.504
492	16	LM-1685	10 µM	MCF7	0.503
493	1047	16,16-dimethylprostaglandin E2	10 µM	MCF7	0.503
494	1034	AG-028671	10 µM	PC3	0.502
495	761	mecamylamine	20 µM	PC3	0.501
496	690	levobunolol	12 µM	MCF7	0.5
497	650	estradiol	100 nM	HL60	0.5
498	752	butamben	21 µM	MCF7	0.5
499	648	cefuroxime	9 µM	HL60	0.5
500	627	adiphenine	11 µM	MCF7	0.499
501	677	risperidone	10 µM	MCF7	0.499
502	506	estradiol	100 nM	MCF7	0.499
503	718	isometheptene	8 µM	PC3	0.499
504	657	thiamine	12 µM	MCF7	0.499
505	611	hydroxyzine	9 µM	PC3	0.498
506	618	dilazep	6 µM	HL60	0.498
507	611	azathioprine	14 µM	PC3	0.497
508	689	trimethobenzamide	9 µM	PC3	0.497
509	632	minaprine	11 µM	MCF7	0.496
510	720	flutamide	14 µM	MCF7	0.496
511	21	genistein	1 µM	MCF7	0.495
512	655	neostigmine bromide	13 µM	MCF7	0.495
513	644	sulfabenzamide	14 µM	HL60	0.494
514	655	dinoprost	8 µM	MCF7	0.494
515	753	vigabatrin	31 µM	PC3	0.494
516	737	harmalol	15 µM	MCF7	0.494
517	649	bendroflumethiazide	9 µM	HL60	0.494
518	766	Prestwick-1082	12 µM	MCF7	0.494
519	731	chloropyrazine	35 µM	PC3	0.493
520	678	mephenytoin	18 µM	MCF7	0.492
521	646	terbutaline	7 µM	MCF7	0.492
522	690	cinchonine	14 µM	MCF7	0.491
523	714	mimosine	20 µM	PC3	0.491
524	95	monastrol	100 µM	MCF7	0.491
525	505	tanespimycin	1 µM	MCF7	0.491
526	611	oleandomycin	5 µM	PC3	0.49
527	718	diprophylline	16 µM	PC3	0.49
528	633	ciprofloxacin	11 µM	MCF7	0.49
529	730	metanephrine	17 µM	MCF7	0.49
530	676	zuclopenthixol	9 µM	MCF7	0.489
531	647	amikacin	7 µM	MCF7	0.489
532	617	nifenazone	13 µM	PC3	0.489
533	741	heptaminol	22 µM	MCF7	0.489
534	749	chloropyrazine	35 µM	HL60	0.489
535	736	tubocurarine chloride	5 µM	MCF7	0.488
536	633	lisuride	12 µM	MCF7	0.488
537	31	fasudil	10 µM	MCF7	0.488
538	743	vinburnine	14 µM	MCF7	0.487
539	506	haloperidol	10 µM	MCF7	0.487
540	719	hyoscyamine	14 µM	PC3	0.487
541	731	physostigmine	6 µM	PC3	0.487
542	711	piperacillin	7 µM	MCF7	0.487
543	690	pheniramine	11 µM	MCF7	0.486
544	660	terguride	12 µM	HL60	0.486
545	644	yohimbic acid	11 µM	HL60	0.486
546	611	haloperidol	11 µM	PC3	0.485
547	772	Prestwick-983	17 µM	MCF7	0.485
548	699	nalidixic acid	15 µM	MCF7	0.484
549	653	N6-methyladenosine	14 µM	MCF7	0.484
550	636	dexamethasone	9 µM	MCF7	0.484
551	665	etomidate	16 µM	HL60	0.483
552	702	phentolamine	13 µM	PC3	0.483
553	646	chlortalidone	12 µM	MCF7	0.483
554	664	moxonidine	17 µM	HL60	0.483
555	665	betulin	9 µM	HL60	0.483
556	626	LY-294002	10 µM	MCF7	0.483
557	662	diclofenac	13 µM	MCF7	0.482
558	602	rosiglitazone	10 µM	HL60	0.482
559	749	ciprofibrate	14 µM	HL60	0.482
560	677	pivmecillinam	8 µM	MCF7	0.482
561	661	Prestwick-920	14 µM	HL60	0.482
562	657	dihydroergocristine	6 µM	MCF7	0.482
563	771	dropropizine	17 µM	MCF7	0.482
564	689	trimethadione	28 µM	PC3	0.482
565	629	thiamphenicol	11 µM	HL60	0.481
566	736	iproniazid	14 µM	MCF7	0.481
567	673	eticlopride	11 µM	MCF7	0.481
568	685	etiocholanolone	14 µM	MCF7	0.481
569	688	suprofen	15 µM	PC3	0.48
570	714	diclofenamide	13 µM	PC3	0.48
571	708	vanoxerine	8 µM	MCF7	0.48
572	634	pilocarpine	15 µM	HL60	0.479
573	748	acenocoumarol	11 µM	MCF7	0.479
574	753	nimodipine	10 µM	PC3	0.479
575	659	hymecromone	23 µM	HL60	0.479
576	743	sulfaquinoxaline	12 µM	MCF7	0.478
577	688	etifenin	12 µM	PC3	0.478
578	747	Prestwick-689	10 µM	MCF7	0.477
579	735	metolazone	11 µM	MCF7	0.477
580	628	sulindac	11 µM	PC3	0.477
581	728	amrinone	21 µM	PC3	0.477
582	732	mephenytoin	18 µM	PC3	0.477
583	676	proscillaridin	8 µM	MCF7	0.477
584	33	valproic acid	50 µM	MCF7	0.477
585	746	hexylcaine	13 µM	MCF7	0.476
586	641	cytisine	21 µM	HL60	0.475
587	752	terazosin	9 µM	MCF7	0.475
588	738	cyclic adenosine monophosphate	12 µM	MCF7	0.474
589	737	gemfibrozil	16 µM	MCF7	0.474
590	661	octopamine	21 µM	HL60	0.473
591	687	homosalate	15 µM	MCF7	0.473
592	670	atractyloside	5 µM	MCF7	0.473
593	627	isoxicam	12 µM	MCF7	0.473
594	699	metaraminol	9 µM	MCF7	0.473
595	750	15-delta prostaglandin J2	10 µM	HL60	0.472
596	687	lithocholic acid	11 µM	MCF7	0.471
597	654	myricetin	13 µM	MCF7	0.471
598	680	cefazolin	8 µM	PC3	0.471
599	730	digoxin	5 µM	MCF7	0.471
600	632	tolazoline	20 µM	MCF7	0.471
601	758	timolol	9 µM	MCF7	0.47
602	611	ciprofloxacin	11 µM	PC3	0.47
603	705	Prestwick-692	7 µM	MCF7	0.47
604	651	carbinoxamine	10 µM	HL60	0.47
605	1089	suramin sodium	10 µM	PC3	0.469
606	753	hexetidine	12 µM	PC3	0.468
607	705	3-acetamidocoumarin	20 µM	MCF7	0.468
608	649	guanadrel	8 µM	HL60	0.468
609	689	co-dergocrine mesilate	6 µM	PC3	0.467
610	513	haloperidol	10 µM	MCF7	0.467
611	704	bicuculline	11 µM	PC3	0.467
612	676	sotalol	13 µM	MCF7	0.466
613	709	acebutolol	11 µM	PC3	0.466
614	654	meclocycline	6 µM	MCF7	0.466
615	686	lanatoside C	4 µM	MCF7	0.466
616	655	velnacrine	12 µM	MCF7	0.466
617	751	helveticoside	7 µM	MCF7	0.465
618	732	naltrexone	10 µM	PC3	0.465
619	671	clidinium bromide	9 µM	MCF7	0.465
620	695	tocainide	17 µM	MCF7	0.465
621	650	LY-294002	100 nM	HL60	0.463
622	665	proguanil	14 µM	HL60	0.463
623	23	sulindac	50 µM	MCF7	0.463
624	635	rifampicin	5 µM	HL60	0.463
625	752	nadide	6 µM	MCF7	0.463
626	19	rofecoxib	10 µM	MCF7	0.463
627	636	canrenoic acid	10 µM	MCF7	0.462
628	1086	vinblastine	100 nM	MCF7	0.462
629	651	isopropamide iodide	8 µM	HL60	0.462
630	714	debrisoquine	9 µM	PC3	0.462
631	715	betamethasone	10 µM	PC3	0.462
632	699	cefamandole	8 µM	MCF7	0.461
633	644	sulmazole	14 µM	HL60	0.461
634	725	acetylsalicylic acid	100 µM	MCF7	0.461
635	636	triamcinolone	10 µM	MCF7	0.46
636	645	etiocholanolone	14 µM	HL60	0.459
637	54	staurosporine	10 nM	MCF7	0.459
638	623	brinzolamide	10 µM	HL60	0.458
639	705	tetramisole	17 µM	MCF7	0.458
640	654	metrizamide	5 µM	MCF7	0.458
641	695	picrotoxinin	14 µM	MCF7	0.458
642	664	Prestwick-984	9 µM	HL60	0.457
643	95	geldanamycin	1 µM	MCF7	0.457
644	690	suprofen	15 µM	MCF7	0.456
645	661	atropine methonitrate	11 µM	HL60	0.456
646	644	galantamine	11 µM	HL60	0.456
647	736	10-methoxyharmalan	19 µM	MCF7	0.456
648	683	spiradoline	1 µM	PC3	0.455
649	619	acemetacin	10 µM	HL60	0.455
650	752	pheneticillin	10 µM	MCF7	0.455
651	762	tiletamine	15 µM	PC3	0.454
652	689	tenoxicam	12 µM	PC3	0.454
653	692	molindone	13 µM	PC3	0.454
654	687	PHA-00745360	1 µM	MCF7	0.454
655	670	cefamandole	8 µM	MCF7	0.454
656	75	monorden	100 nM	HL60	0.454
657	686	piperacillin	7 µM	MCF7	0.454
658	1055	NS-398	10 µM	MCF7	0.453
659	686	pempidine	13 µM	MCF7	0.453
660	672	Prestwick-857	12 µM	MCF7	0.453
661	627	allantoin	25 µM	MCF7	0.452
662	505	5151277	14 µM	MCF7	0.452
663	637	flumequine	15 µM	MCF7	0.452
664	756	halofantrine	7 µM	MCF7	0.451
665	630	ketoconazole	8 µM	HL60	0.451
666	661	tiletamine	15 µM	HL60	0.451
667	661	ketorolac	11 µM	HL60	0.451
668	699	tiapride	11 µM	MCF7	0.451
669	648	strophanthidin	10 µM	HL60	0.451
670	702	PHA-00851261E	1 µM	PC3	0.451
671	703	citalopram	1 µM	PC3	0.451
672	665	spaglumic acid	13 µM	HL60	0.45
673	662	aconitine	6 µM	MCF7	0.45
674	725	troglitazone	10 µM	MCF7	0.45
675	630	oxantel	7 µM	HL60	0.45
676	676	epitiostanol	13 µM	MCF7	0.45
677	614	pindolol	16 µM	HL60	0.449
678	38	raloxifene	100 nM	ssMCF7	0.449
679	752	propidium iodide	6 µM	MCF7	0.449
680	751	myosmine	27 µM	MCF7	0.449
681	631	metrizamide	5 µM	HL60	0.448
682	661	rilmenidine	8 µM	HL60	0.447
683	644	gelsemine	12 µM	HL60	0.447
684	705	iocetamic acid	7 µM	MCF7	0.447
685	713	flurbiprofen	16 µM	PC3	0.447
686	504	geldanamycin	1 µM	MCF7	0.447
687	694	meptazinol	15 µM	MCF7	0.447
688	632	acebutolol	11 µM	MCF7	0.447
689	676	tocainide	17 µM	MCF7	0.447
690	619	dyclonine	12 µM	HL60	0.446
691	737	pirlindole	12 µM	MCF7	0.445
692	636	tetracycline	8 µM	MCF7	0.445
693	650	LY-294002	10 µM	HL60	0.445
694	736	betazole	27 µM	MCF7	0.444
695	704	pancuronium bromide	5 µM	PC3	0.443
696	752	strophanthidin	10 µM	MCF7	0.442
697	619	triprolidine	13 µM	HL60	0.442
698	685	foliosidine	13 µM	MCF7	0.441
699	728	clidinium bromide	9 µM	PC3	0.441
700	110b	fulvestrant	1 µM	PC3	0.44
701	651	bergenin	12 µM	HL60	0.44
702	699	mephenesin	22 µM	MCF7	0.439
703	762	hydrastine hydrochloride	10 µM	PC3	0.439
704	772	tetracaine	13 µM	MCF7	0.439
705	766	laudanosine	11 µM	MCF7	0.438
706	648	streptozocin	15 µM	HL60	0.437
707	729	mimosine	20 µM	MCF7	0.437
708	602	acetylsalicylic acid	100 µM	HL60	0.436
709	44	tetraethylenepentamine	100 µM	HL60	0.435
710	648	anabasine	25 µM	HL60	0.435
711	630	prochlorperazine	7 µM	HL60	0.434
712	713	pirenperone	10 µM	PC3	0.434
713	1082	CP-944629	10 µM	MCF7	0.434
714	680	trimethoprim	14 µM	PC3	0.434
715	657	scoulerine	12 µM	MCF7	0.433
716	632	trimethobenzamide	9 µM	MCF7	0.433
717	633	dehydrocholic acid	10 µM	MCF7	0.433
718	649	spiramycin	5 µM	HL60	0.433
719	630	clomifene	7 µM	HL60	0.432
720	22a	tacrolimus	1 µM	MCF7	0.432
721	615	mafenide	18 µM	HL60	0.432
722	658	oxolamine	9 µM	HL60	0.431
723	623	hycanthone	11 µM	HL60	0.431
724	658	etidronic acid	16 µM	HL60	0.43
725	680	guanadrel	8 µM	PC3	0.43
726	704	tiabendazole	20 µM	PC3	0.43
727	727	genistein	10 µM	PC3	0.429
728	748	pirenzepine	9 µM	MCF7	0.429
729	747	ursolic acid	9 µM	MCF7	0.429
730	1008	AG-013608	10 µM	MCF7	0.429
731	747	benzydamine	12 µM	MCF7	0.429
732	636	dihydrostreptomycin	3 µM	MCF7	0.428
733	40	cobalt chloride	100 µM	MCF7	0.427
734	680	riluzole	15 µM	PC3	0.427
735	736	proxymetacaine	12 µM	MCF7	0.427
736	648	cefmetazole	8 µM	HL60	0.426
737	691	trimethadione	28 µM	MCF7	0.426
738	706	Prestwick-857	12 µM	MCF7	0.426
739	22a	fludrocortisone	1 µM	MCF7	0.425
740	645	betonicine	25 µM	HL60	0.425
741	23	fulvestrant	10 nM	MCF7	0.425
742	22a	quercetin	1 µM	MCF7	0.425
743	1048	fulvestrant	1 µM	PC3	0.423
744	659	propranolol	14 µM	HL60	0.423
745	665	levopropoxyphene	7 µM	HL60	0.423
746	646	sulfinpyrazone	10 µM	MCF7	0.422
747	767	valproic acid	50 µM	MCF7	0.422
748	752	estropipate	9 µM	MCF7	0.422
749	735	clopamide	12 µM	MCF7	0.422
750	68	monorden	100 nM	MCF7	0.421
751	602	LY-294002	10 µM	HL60	0.421
752	644	harmaline	14 µM	HL60	0.421
753	1053	AH-23848	1 µM	MCF7	0.421
754	649	flecainide	8 µM	HL60	0.42
755	688	cefotetan	7 µM	PC3	0.42
756	611	aciclovir	18 µM	PC3	0.42
757	1048	SC-560	10 µM	PC3	0.42
758	650	sirolimus	100 nM	HL60	0.419
759	655	carbimazole	21 µM	MCF7	0.419
760	94	probucol	10 µM	MCF7	0.419
761	748	mesalazine	26 µM	MCF7	0.419
762	687	levcycloserine	39 µM	MCF7	0.419
763	644	conessine	11 µM	HL60	0.419
764	506	tanespimycin	1 µM	MCF7	0.418
765	726	pentetic acid	10 µM	MCF7	0.418
766	689	propylthiouracil	23 µM	PC3	0.417
767	68	haloperidol	10 µM	MCF7	0.417
768	687	santonin	16 µM	MCF7	0.417
769	686	methylbenzethonium chloride	9 µM	MCF7	0.416
770	729	nicotinic acid	32 µM	MCF7	0.416
771	602	estradiol	10 nM	HL60	0.415
772	708	guanabenz	14 µM	MCF7	0.414
773	635	vancomycin	3 µM	HL60	0.413
774	750	LY-294002	10 µM	HL60	0.413
775	749	cefepime	7 µM	HL60	0.413
776	635	omeprazole	12 µM	HL60	0.412
777	677	penbutolol	6 µM	MCF7	0.412
778	623	zidovudine	15 µM	HL60	0.412
779	103	monastrol	20 µM	MCF7	0.412
780	718	torasemide	11 µM	PC3	0.41
781	613	josamycin	5 µM	HL60	0.41
782	656	L-methionine sulfoximine	22 µM	MCF7	0.409
783	736	nomegestrol	11 µM	MCF7	0.407
784	744	stachydrine	22 µM	MCF7	0.407
785	686	benfotiamine	9 µM	MCF7	0.406
786	699	sulfamethoxazole	16 µM	MCF7	0.406
787	614	acetylsalicylsalicylic acid	13 µM	HL60	0.405
788	743	chlorphenamine	10 µM	MCF7	0.405
789	737	metformin	24 µM	MCF7	0.405
790	659	nicotinic acid	32 µM	HL60	0.404
791	644	protoveratrine A	5 µM	HL60	0.404
792	751	2,6-dimethylpiperidine	27 µM	MCF7	0.404
793	633	metanephrine	17 µM	MCF7	0.404
794	737	imidurea	10 µM	MCF7	0.403
795	700	isosorbide	17 µM	MCF7	0.403
796	695	orciprenaline	8 µM	MCF7	0.403
797	644	canavanine	14 µM	HL60	0.402
798	505	quercetin	1 µM	MCF7	0.402
799	655	digoxin	5 µM	MCF7	0.401
800	654	lysergol	16 µM	MCF7	0.401
801	744	clidinium bromide	9 µM	MCF7	0.401
802	772	quinpirole	16 µM	MCF7	0.4
803	649	atractyloside	5 µM	HL60	0.4
804	665	tridihexethyl	11 µM	HL60	0.4
805	657	tubocurarine chloride	5 µM	MCF7	0.4
806	54	tanespimycin	1 µM	MCF7	0.399
807	655	naringin	7 µM	MCF7	0.397
808	21	thalidomide	100 µM	MCF7	0.397
809	737	hydrastinine	16 µM	MCF7	0.397
810	720	CP-690334-01	1 µM	MCF7	0.396
811	637	ranitidine	11 µM	MCF7	0.396
812	750	LY-294002	10 µM	HL60	0.396
813	101	geldanamycin	1 µM	MCF7	0.396
814	755	oxybenzone	18 µM	MCF7	0.396
815	659	ethaverine	9 µM	HL60	0.396
816	676	cyclopenthiazide	11 µM	MCF7	0.396
817	623	amikacin	7 µM	HL60	0.395
818	694	colistin	3 µM	MCF7	0.395
819	670	cefazolin	8 µM	MCF7	0.393
820	692	sulfathiazole	16 µM	PC3	0.393
821	612	minoxidil	19 µM	HL60	0.393
822	1078	0198306-0000	10 µM	MCF7	0.393
823	630	benzbromarone	9 µM	HL60	0.393
824	629	heptaminol	22 µM	HL60	0.392
825	615	nifenazone	13 µM	HL60	0.392
826	671	cromoglicic acid	8 µM	MCF7	0.392
827	747	isoetarine	12 µM	MCF7	0.391
828	738	dropropizine	17 µM	MCF7	0.391
829	602	LY-294002	100 nM	HL60	0.391
830	614	atropine oxide	12 µM	HL60	0.391
831	630	fusidic acid	7 µM	HL60	0.39
832	676	molindone	13 µM	MCF7	0.388
833	649	merbromin	5 µM	HL60	0.388
834	622	furosemide	12 µM	HL60	0.388
835	660	bephenium hydroxynaphthoate	9 µM	HL60	0.388
836	688	canadine	12 µM	PC3	0.387
837	654	cefixime	9 µM	MCF7	0.387
838	619	cortisone	11 µM	HL60	0.386
839	659	esculin	12 µM	HL60	0.385
840	714	biotin	16 µM	PC3	0.384
841	40	tanespimycin	1 µM	MCF7	0.384
842	693	cefalonium	9 µM	PC3	0.384
843	636	spironolactone	10 µM	MCF7	0.384
844	110b	genistein	10 µM	PC3	0.384
845	689	xylazine	18 µM	PC3	0.383
846	729	meglumine	20 µM	MCF7	0.381
847	660	dexibuprofen	19 µM	HL60	0.381
848	53	trifluoperazine	10 µM	MCF7	0.381
849	715	ceforanide	8 µM	PC3	0.38
850	665	asiaticoside	4 µM	HL60	0.38
851	646	clonidine	15 µM	MCF7	0.379
852	634	butoconazole	8 µM	HL60	0.379
853	695	gibberellic acid	12 µM	MCF7	0.378
854	653	coralyne	10 µM	MCF7	0.377
855	619	diethylcarbamazine	10 µM	HL60	0.377
856	693	indoprofen	14 µM	PC3	0.377
857	623	clorgiline	13 µM	HL60	0.376
858	21	prednisolone	1 µM	MCF7	0.375
859	623	enoxacin	12 µM	HL60	0.375
860	26b	arachidonyltrifluoromethane	10 µM	MCF7	0.375
861	670	guaifenesin	20 µM	MCF7	0.375
862	745	pheneticillin	10 µM	MCF7	0.374
863	1084	CP-863187	10 µM	MCF7	0.374
864	630	buspirone	9 µM	HL60	0.374
865	691	cimetidine	16 µM	MCF7	0.374
866	658	carbenoxolone	7 µM	HL60	0.373
867	660	pralidoxime	23 µM	HL60	0.373
868	749	tropine	28 µM	HL60	0.373
869	650	sirolimus	100 nM	HL60	0.371
870	725	LY-294002	10 µM	MCF7	0.371
871	693	salsolinol	15 µM	PC3	0.37
872	641	noscapine	10 µM	HL60	0.37
873	765	rosiglitazone	10 µM	MCF7	0.369
874	43	tetraethylenepentamine	10 µM	MCF7	0.369
875	636	midodrine	14 µM	MCF7	0.368
876	1010	tanespimycin	1 µM	MCF7	0.367
877	746	lobeline	11 µM	MCF7	0.367
878	58	copper sulfate	100 µM	MCF7	0.366
879	676	pronetalol	15 µM	MCF7	0.366
880	757	genistein	10 µM	MCF7	0.365
881	681	6-benzylaminopurine	18 µM	PC3	0.364
882	692	propantheline bromide	9 µM	PC3	0.363
883	1061	carmustine	100 µM	MCF7	0.362
884	110b	alpha-estradiol	10 nM	PC3	0.362
885	645	mepenzolate bromide	10 µM	HL60	0.362
886	630	hesperidin	7 µM	HL60	0.361
887	602	alvespimycin	100 nM	HL60	0.361
888	661	alfaxalone	12 µM	HL60	0.36
889	665	loracarbef	11 µM	HL60	0.36
890	612	miconazole	10 µM	HL60	0.36
891	622	praziquantel	13 µM	HL60	0.359
892	648	propidium iodide	6 µM	HL60	0.358
893	629	diphenhydramine	14 µM	HL60	0.358
894	619	bufexamac	18 µM	HL60	0.358
895	658	Prestwick-857	12 µM	HL60	0.357
896	757	alvespimycin	100 nM	MCF7	0.356
897	623	ascorbic acid	22 µM	HL60	0.355
898	714	nicotinic acid	32 µM	PC3	0.355
899	629	dexpanthenol	19 µM	HL60	0.354
900	713	pentetic acid	10 µM	PC3	0.354
901	670	isocarboxazid	17 µM	MCF7	0.353
902	618	ofloxacin	11 µM	HL60	0.353
903	658	(+/-)-catechin	14 µM	HL60	0.353
904	715	buspirone	9 µM	PC3	0.352
905	658	paromomycin	6 µM	HL60	0.352
906	90	U0125	1 µM	PC3	0.352
907	68	dopamine	1 µM	MCF7	0.351
908	627	sulfaphenazole	13 µM	MCF7	0.351
909	705	sulpiride	12 µM	MCF7	0.35
910	631	levothyroxine sodium	5 µM	HL60	0.348
911	505	wortmannin	10 nM	MCF7	0.348
912	644	boldine	12 µM	HL60	0.347
913	1010	estradiol	10 nM	MCF7	0.347
914	22a	fludrocortisone	1 µM	MCF7	0.345
915	612	diflunisal	16 µM	HL60	0.345
916	660	(-)-atenolol	15 µM	HL60	0.345
917	8	tacrolimus	1 µM	MCF7	0.344
918	653	zoxazolamine	24 µM	MCF7	0.343
919	53	thioridazine	1 µM	MCF7	0.343
920	17	tomelukast	1 µM	MCF7	0.342
921	658	Prestwick-864	35 µM	HL60	0.341
922	1	metformin	1 mM	MCF7	0.34
923	613	guanabenz	14 µM	HL60	0.34
924	629	sulindac	11 µM	HL60	0.34
925	637	mafenide	18 µM	MCF7	0.339
926	16	rofecoxib	10 µM	MCF7	0.339
927	692	naftopidil	9 µM	PC3	0.339
928	69	iloprost	1 µM	SKMEL5	0.339
929	659	2-aminobenzenesulfonamide	23 µM	HL60	0.339
930	648	ramifenazone	14 µM	HL60	0.339
931	699	monensin	6 µM	MCF7	0.338
932	618	mexiletine	19 µM	HL60	0.337
933	618	mephenesin	22 µM	HL60	0.337
934	54	iloprost	1 µM	MCF7	0.337
935	693	salsolidin	16 µM	PC3	0.337
936	771	dyclonine	12 µM	MCF7	0.336
937	658	chloropyramine	12 µM	HL60	0.335
938	772	bacitracin	3 µM	MCF7	0.334
939	687	ciclacillin	12 µM	MCF7	0.334
940	634	cefotiam	7 µM	HL60	0.331
941	17	tanespimycin	100 nM	MCF7	0.327
942	626	tanespimycin	1 µM	MCF7	0.327
943	602	sirolimus	100 nM	HL60	0.327
944	622	mepyramine	10 µM	HL60	0.326
945	650	haloperidol	10 µM	HL60	0.325
946	738	pentetrazol	29 µM	MCF7	0.325
947	772	thiamine	12 µM	MCF7	0.323
948	735	ganciclovir	16 µM	MCF7	0.323
949	614	chlorphenamine	10 µM	HL60	0.316
950	752	napelline	11 µM	MCF7	0.315
951	678	piperacetazine	10 µM	MCF7	0.314
952	618	vincamine	11 µM	HL60	0.313
953	70	tetraethylenepentamine	100 µM	ssMCF7	0.31
954	700	betonicine	25 µM	MCF7	0.308
955	96	nifedipine	10 µM	MCF7	0.307
956	755	benserazide	14 µM	MCF7	0.307
957	641	demecarium bromide	6 µM	HL60	0.301
958	75	1,5-isoquinolinediol	100 µM	HL60	0.3
959	62	quinpirole	1 µM	MCF7	0.3
960	631	SR-95639A	10 µM	HL60	0.298
961	615	flumequine	15 µM	HL60	0.296
962	40	genistein	10 µM	MCF7	0.294
963	619	ifenprodil	8 µM	HL60	0.294
964	640	chloroquine	8 µM	HL60	0.293
965	641	tomatidine	10 µM	HL60	0.289
966	629	mefenamic acid	17 µM	HL60	0.289
967	658	nadolol	13 µM	HL60	0.288
968	618	prilocaine	16 µM	HL60	0.288
969	630	bisoprolol	9 µM	HL60	0.287
970	615	hydrastinine	16 µM	HL60	0.285
971	630	procainamide	15 µM	HL60	0.283
972	641	atropine	6 µM	HL60	0.28
973	13	nordihydroguaiaretic acid	1 µM	MCF7	0.276
974	615	oxymetazoline	13 µM	HL60	0.274
975	612	prednisone	11 µM	HL60	0.272
976	623	chlorpropamide	14 µM	HL60	0.271
977	16	SC-58125	10 µM	MCF7	0.269
978	630	tacrine	16 µM	HL60	0.267
979	630	ouabain	5 µM	HL60	0.264
980	623	phenylpropanolamine	21 µM	HL60	0.258
981	96	arachidonic acid	10 µM	MCF7	0.258
982	614	tranexamic acid	25 µM	HL60	0.256
983	650	estradiol	10 nM	HL60	0.254
984	640	tetracaine	13 µM	HL60	0.25
985	631	SR-95531	11 µM	HL60	0.246
986	25	N-phenylanthranilic acid	10 µM	MCF7	0.242
987	629	adiphenine	11 µM	HL60	0.236
988	615	piroxicam	12 µM	HL60	0.23
989	635	orciprenaline	8 µM	HL60	0
990	628	hydroflumethiazide	12 µM	PC3	0
991	663	succinylsulfathiazole	11 µM	MCF7	0
992	741	netilmicin	3 µM	MCF7	0
993	753	prazosin	10 µM	PC3	0
994	619	fenoterol	10 µM	HL60	0
995	628	triflupromazine	10 µM	PC3	0
996	761	articaine	12 µM	PC3	0
997	1003	rotenone	1 µM	PC3	0
998	628	diphenhydramine	14 µM	PC3	0
999	619	pergolide	10 µM	HL60	0
1000	761	viomycin	5 µM	PC3	0
1001	628	heptaminol	22 µM	PC3	0
1002	659	(+)-isoprenaline	11 µM	HL60	0
1003	676	alprostadil	11 µM	MCF7	0
1004	662	stachydrine	22 µM	MCF7	0
1005	744	kinetin	19 µM	MCF7	0
1006	628	betazole	27 µM	PC3	0
1007	628	epirizole	17 µM	PC3	0
1008	670	merbromin	5 µM	MCF7	0
1009	764	vinburnine	14 µM	PC3	0
1010	614	nocodazole	13 µM	HL60	0
1011	704	Prestwick-692	7 µM	PC3	0
1012	750	tretinoin	1 µM	HL60	0
1013	688	oxamniquine	14 µM	PC3	0
1014	676	decamethonium bromide	10 µM	MCF7	0
1015	706	acebutolol	11 µM	MCF7	0
1016	677	levopropoxyphene	7 µM	MCF7	0
1017	623	methylergometrine	9 µM	HL60	0
1018	663	palmatine	10 µM	MCF7	0
1019	730	bisoprolol	9 µM	MCF7	0
1020	628	dapsone	16 µM	PC3	0
1021	662	vinburnine	14 µM	MCF7	0
1022	628	metformin	24 µM	PC3	0
1023	727	valproic acid	1 mM	PC3	0
1024	617	metampicillin	10 µM	PC3	0
1025	1009	rotenone	1 µM	PC3	0
1026	713	digoxigenin	10 µM	PC3	0
1027	1041	Gly-His-Lys	1 µM	MCF7	0
1028	727	estradiol	10 nM	PC3	0
1029	603	sirolimus	100 nM	PC3	0
1030	618	mebendazole	14 µM	HL60	0
1031	656	trimethadione	28 µM	MCF7	0
1032	762	pentoxifylline	14 µM	PC3	0
1033	761	enalapril	8 µM	PC3	0
1034	651	isoetarine	12 µM	HL60	0
1035	614	disulfiram	13 µM	HL60	0
1036	713	methyldopa	19 µM	PC3	0
1037	766	adiphenine	11 µM	MCF7	0
1038	628	thiamphenicol	11 µM	PC3	0
1039	712	iohexol	5 µM	PC3	0
1040	764	chlortalidone	12 µM	PC3	0
1041	614	dihydroergotamine	3 µM	HL60	0
1042	618	fenbendazole	13 µM	HL60	0
1043	761	adiphenine	11 µM	PC3	0
1044	663	canadine	12 µM	MCF7	0
1045	772	ajmaline	12 µM	MCF7	0
1046	712	androsterone	14 µM	PC3	0
1047	648	tetryzoline	17 µM	HL60	0
1048	688	sisomicin	3 µM	PC3	0
1049	753	2-aminobenzenesulfonamide	23 µM	PC3	0
1050	1091	fulvestrant	1 µM	PC3	0
1051	772	halofantrine	7 µM	MCF7	0
1052	761	azapropazone	13 µM	PC3	0
1053	628	adiphenine	11 µM	PC3	0
1054	662	quipazine	9 µM	MCF7	0
1055	663	Prestwick-691	14 µM	MCF7	0
1056	665	quinpirole	16 µM	HL60	0
1057	628	atracurium besilate	3 µM	PC3	0
1058	622	mepacrine	8 µM	HL60	0
1059	616	midodrine	14 µM	PC3	0
1060	725	sirolimus	100 nM	MCF7	0
1061	653	hesperidin	7 µM	MCF7	0
1062	706	khellin	15 µM	MCF7	0
1063	628	isoflupredone	10 µM	PC3	0
1064	671	pyrithyldione	24 µM	MCF7	0
1065	1095	vinblastine	100 nM	PC3	0
1066	1077	0316684-0000	10 µM	PC3	0
1067	695	iodixanol	3 µM	MCF7	0
1068	626	sirolimus	100 nM	MCF7	0
1069	692	mestranol	13 µM	PC3	0
1070	745	chloropyrazine	35 µM	MCF7	0
1071	654	pepstatin	6 µM	MCF7	0
1072	685	karakoline	11 µM	MCF7	0
1073	681	metoclopramide	12 µM	PC3	0
1074	691	L-methionine sulfoximine	22 µM	MCF7	0
1075	616	dihydroergotamine	3 µM	PC3	0
1076	747	streptozocin	15 µM	MCF7	0
1077	1077	SC-19220	10 µM	PC3	0
1078	637	alverine	8 µM	MCF7	0
1079	1094	BCB000040	10 µM	MCF7	0
1080	729	profenamine	11 µM	MCF7	0
1081	699	guanadrel	8 µM	MCF7	0
1082	681	isosorbide	17 µM	PC3	0
1083	626	valproic acid	500 µM	MCF7	0
1084	734	gentamicin	3 µM	PC3	0
1085	731	pheneticillin	10 µM	PC3	0
1086	1005	sirolimus	100 nM	PC3	0
1087	708	iohexol	5 µM	MCF7	0
1088	618	salbutamol	17 µM	HL60	0
1089	663	benzocaine	24 µM	MCF7	0
1090	706	cefaclor	10 µM	MCF7	0
1091	646	mebeverine	9 µM	MCF7	0
1092	718	harmalol	15 µM	PC3	0
1093	772	mefexamide	13 µM	MCF7	0
1094	632	cimetidine	16 µM	MCF7	0
1095	622	clonidine	15 µM	HL60	0
1096	663	cinchonine	14 µM	MCF7	0
1097	690	nadolol	13 µM	MCF7	0
1098	730	benfluorex	10 µM	MCF7	0
1099	741	chenodeoxycholic acid	10 µM	MCF7	0
1100	603	haloperidol	10 µM	PC3	0
1101	728	cefalotin	10 µM	PC3	0
1102	1062	AG-012559	10 µM	PC3	0
1103	628	acetazolamide	18 µM	PC3	0
1104	733	folic acid	9 µM	PC3	0
1105	642	ethisterone	13 µM	MCF7	0
1106	651	ebselen	15 µM	HL60	0
1107	753	arecoline	17 µM	PC3	0
1108	704	vancomycin	3 µM	PC3	0
1109	649	alexidine	7 µM	HL60	0
1110	644	co-dergocrine mesilate	6 µM	HL60	0
1111	617	pentoxifylline	14 µM	PC3	0
1112	627	diphenhydramine	14 µM	MCF7	0
1113	729	paclitaxel	5 µM	MCF7	0
1114	731	gallamine triethiodide	4 µM	PC3	0
1115	633	moroxydine	19 µM	MCF7	0
1116	630	ritodrine	12 µM	HL60	0
1117	719	metampicillin	10 µM	PC3	0
1118	761	meclofenamic acid	12 µM	PC3	0
1119	765	valproic acid	500 µM	MCF7	0
1120	683	PHA-00745360	10 µM	PC3	0
1121	757	estradiol	100 nM	MCF7	0
1122	762	chenodeoxycholic acid	10 µM	PC3	0
1123	653	clebopride	8 µM	MCF7	0
1124	734	mesalazine	26 µM	PC3	0
1125	755	timolol	9 µM	MCF7	0
1126	1094	CP-863187	10 µM	MCF7	0
1127	713	3-hydroxy-DL-kynurenine	18 µM	PC3	0
1128	730	oxantel	7 µM	MCF7	0
1129	707	(+)-isoprenaline	11 µM	MCF7	0
1130	692	idoxuridine	11 µM	PC3	0
1131	728	estropipate	9 µM	PC3	0
1132	727	valproic acid	200 µM	PC3	0
1133	619	glafenine	10 µM	HL60	0
1134	632	metronidazole	23 µM	MCF7	0
1135	691	Prestwick-691	14 µM	MCF7	0
1136	707	brinzolamide	10 µM	MCF7	0
1137	506	estradiol	10 nM	MCF7	0
1138	728	iopromide	5 µM	PC3	0
1139	737	loracarbef	11 µM	MCF7	0
1140	505	5149715	10 µM	MCF7	0
1141	756	Prestwick-983	17 µM	MCF7	0
1142	762	ethosuximide	28 µM	PC3	0
1143	694	minoxidil	19 µM	MCF7	0
1144	758	biperiden	11 µM	MCF7	0
1145	603	fulvestrant	10 nM	PC3	0
1146	627	homatropine	11 µM	MCF7	0
1147	43	sodium phenylbutyrate	1 mM	MCF7	0
1148	646	tremorine	15 µM	MCF7	0
1149	1014	sirolimus	100 nM	MCF7	0
1150	672	nadolol	13 µM	MCF7	0
1151	1027	PF-00539758-00	10 µM	PC3	0
1152	694	tolnaftate	13 µM	MCF7	0
1153	681	diphenylpyraline	13 µM	PC3	0
1154	733	sulfamonomethoxine	14 µM	PC3	0
1155	654	cefadroxil	11 µM	MCF7	0
1156	688	nadolol	13 µM	PC3	0
1157	756	bacitracin	3 µM	MCF7	0
1158	623	clenbuterol	13 µM	HL60	0
1159	1027	orlistat	10 µM	PC3	0
1160	1061	SB-203580	1 µM	MCF7	0
1161	719	bethanechol	20 µM	PC3	0
1162	688	metronidazole	23 µM	PC3	0
1163	657	tetracaine	13 µM	MCF7	0
1164	741	pentoxifylline	14 µM	MCF7	0
1165	650	troglitazone	10 µM	HL60	0
1166	771	triprolidine	13 µM	MCF7	0
1167	688	levobunolol	12 µM	PC3	0
1168	765	haloperidol	10 µM	MCF7	0
1169	728	dacarbazine	22 µM	PC3	0
1170	43	sodium phenylbutyrate	1 mM	MCF7	0
1171	680	cefamandole	8 µM	PC3	0
1172	692	zardaverine	15 µM	PC3	0
1173	693	tocainide	17 µM	PC3	0
1174	709	theobromine	22 µM	PC3	0
1175	687	diethylstilbestrol	15 µM	MCF7	0
1176	745	dienestrol	15 µM	MCF7	0
1177	761	laudanosine	11 µM	PC3	0
1178	653	arecoline	17 µM	MCF7	0
1179	642	fludrocortisone	9 µM	MCF7	0
1180	753	chlorhexidine	8 µM	PC3	0
1181	662	epivincamine	11 µM	MCF7	0
1182	683	PHA-00745360	1 µM	PC3	0
1183	681	karakoline	11 µM	PC3	0
1184	628	isoxicam	12 µM	PC3	0
1185	712	felbinac	19 µM	PC3	0
1186	726	biperiden	11 µM	MCF7	0
1187	649	alpha-ergocryptine	7 µM	HL60	0
1188	757	sirolimus	100 nM	MCF7	0
1189	622	albendazole	15 µM	HL60	0
1190	741	nifenazone	13 µM	MCF7	0
1191	1083	suramin sodium	10 µM	PC3	0
1192	749	oxedrine	24 µM	HL60	0
1193	688	chlorogenic acid	11 µM	PC3	0
1194	685	lomefloxacin	10 µM	MCF7	0
1195	746	hydroquinine	9 µM	MCF7	0
1196	690	chlorogenic acid	11 µM	MCF7	0
1197	663	sparteine	17 µM	MCF7	0
1198	694	isoxsuprine	12 µM	MCF7	0
1199	1094	vinblastine	100 nM	MCF7	0
1200	691	furazolidone	18 µM	MCF7	0
1201	704	prednisone	11 µM	PC3	0
1202	733	ketotifen	9 µM	PC3	0
1203	676	nifurtimox	14 µM	MCF7	0
1204	728	clofilium tosylate	8 µM	PC3	0
1205	671	butacaine	13 µM	MCF7	0
1206	672	lasalocid	7 µM	MCF7	0
1207	633	metolazone	11 µM	MCF7	0
1208	688	amiprilose	12 µM	PC3	0
1209	661	Prestwick-983	17 µM	HL60	0
1210	628	metrifonate	16 µM	PC3	0
1211	1021	0225151-0000	10 µM	PC3	0
1212	714	phenylpropanolamine	21 µM	PC3	0
1213	690	boldine	12 µM	MCF7	0
1214	506	LY-294002	100 nM	MCF7	0
1215	633	chlortetracycline	8 µM	MCF7	0
1216	692	pepstatin	6 µM	PC3	0
1217	700	karakoline	11 µM	MCF7	0
1218	616	dihydrostreptomycin	3 µM	PC3	0
1219	765	fulvestrant	10 nM	MCF7	0
1220	1091	BCB000039	10 µM	PC3	0
1221	694	zalcitabine	19 µM	MCF7	0
1222	664	alprostadil	11 µM	HL60	0
1223	1077	fulvestrant	1 µM	PC3	0
1224	745	trichostatin A	100 nM	MCF7	0
1225	632	hydrochlorothiazide	13 µM	MCF7	0
1226	750	troglitazone	10 µM	HL60	0
1227	702	0317956-0000	1 µM	PC3	0
1228	698	sulfadimethoxine	13 µM	PC3	0
1229	687	parbendazole	16 µM	MCF7	0
1230	754	raubasine	10 µM	PC3	0
1231	1033	dinoprostone	10 µM	MCF7	0
1232	688	cinchonine	14 µM	PC3	0
1233	702	spiramycin	5 µM	PC3	0
1234	720	diethylstilbestrol	15 µM	MCF7	0
1235	698	salbutamol	17 µM	PC3	0
1236	1032	PHA-00767505E	10 µM	PC3	0
1237	771	minocycline	8 µM	MCF7	0
1238	725	valproic acid	500 µM	MCF7	0
1239	677	Prestwick-1082	12 µM	MCF7	0
1240	687	fenbendazole	13 µM	MCF7	0
1241	653	droperidol	11 µM	MCF7	0
1242	735	dinoprost	8 µM	MCF7	0
1243	772	aminoglutethimide	17 µM	MCF7	0
1244	735	nizatidine	12 µM	MCF7	0
1245	703	PHA-00745360	1 µM	PC3	0
1246	749	(-)-isoprenaline	16 µM	HL60	0
1247	752	sulfapyridine	16 µM	MCF7	0
1248	752	leflunomide	15 µM	MCF7	0
1249	690	benzathine benzylpenicillin	4 µM	MCF7	0
1250	627	heptaminol	22 µM	MCF7	0
1251	693	letrozole	14 µM	PC3	0
1252	623	cefoperazone	6 µM	HL60	0
1253	699	atractyloside	5 µM	MCF7	0
1254	712	chlormezanone	15 µM	PC3	0
1255	505	celecoxib	10 µM	MCF7	0
1256	647	adenosine phosphate	11 µM	MCF7	0
1257	771	bupivacaine	12 µM	MCF7	0
1258	671	iopamidol	5 µM	MCF7	0
1259	616	ampyrone	20 µM	PC3	0
1260	687	thiamazole	35 µM	MCF7	0
1261	641	hydroquinine	9 µM	HL60	0
1262	661	nabumetone	18 µM	HL60	0
1263	632	phenazone	21 µM	MCF7	0
1264	628	sulfacetamide	16 µM	PC3	0
1265	677	betulin	9 µM	MCF7	0
1266	752	podophyllotoxin	10 µM	MCF7	0
1267	504	5252917	14 µM	MCF7	0
1268	648	benzethonium chloride	9 µM	HL60	0
1269	720	CP-320650-01	1 µM	MCF7	0
1270	651	corbadrine	22 µM	HL60	0
1271	767	sirolimus	100 nM	MCF7	0
1272	765	sirolimus	100 nM	MCF7	0
1273	720	spiradoline	1 µM	MCF7	0
1274	613	bromocriptine	5 µM	HL60	0
1275	737	levopropoxyphene	7 µM	MCF7	0
1276	694	benzocaine	24 µM	MCF7	0
1277	506	valproic acid	500 µM	MCF7	0
1278	737	piracetam	28 µM	MCF7	0
1279	642	phentolamine	13 µM	MCF7	0
1280	654	betulinic acid	9 µM	MCF7	0
1281	656	lovastatin	10 µM	MCF7	0
1282	686	bendroflumethiazide	9 µM	MCF7	0
1283	681	etiocholanolone	14 µM	PC3	0
1284	616	isoniazid	29 µM	PC3	0
1285	735	2-aminobenzenesulfonamide	23 µM	MCF7	0
1286	703	ciclacillin	12 µM	PC3	0
1287	602	tretinoin	1 µM	HL60	0
1288	694	zardaverine	15 µM	MCF7	0
1289	690	brompheniramine	9 µM	MCF7	0
1290	662	racecadotril	10 µM	MCF7	0
1291	720	PHA-00745360	10 µM	MCF7	0
1292	691	amylocaine	15 µM	MCF7	0
1293	662	cinchonidine	14 µM	MCF7	0
1294	694	propantheline bromide	9 µM	MCF7	0
1295	688	amiloride	13 µM	PC3	0
1296	688	benzathine benzylpenicillin	4 µM	PC3	0
1297	748	gentamicin	3 µM	MCF7	0
1298	603	LY-294002	10 µM	PC3	0
1299	681	benzamil	11 µM	PC3	0
1300	70	copper sulfate	100 µM	ssMCF7	0
1301	728	kinetin	19 µM	PC3	0
1302	654	bacampicillin	8 µM	MCF7	0
1303	616	tetracycline	8 µM	PC3	0
1304	628	triamterene	16 µM	PC3	0
1305	663	Prestwick-642	14 µM	MCF7	0
1306	726	aciclovir	18 µM	MCF7	0
1307	772	methocarbamol	17 µM	MCF7	0
1308	628	mefenamic acid	17 µM	PC3	0
1309	706	methyldopate	15 µM	MCF7	0
1310	619	prednisolone	11 µM	HL60	0
1311	612	tolazoline	20 µM	HL60	0
1312	706	Prestwick-984	9 µM	MCF7	0
1313	1062	H-89	500 nM	PC3	0
1314	636	dizocilpine	12 µM	MCF7	0
1315	764	midodrine	14 µM	PC3	0
1316	733	Prestwick-689	10 µM	PC3	0
1317	622	terbutaline	7 µM	HL60	0
1318	700	myosmine	27 µM	MCF7	0
1319	751	etiocholanolone	14 µM	MCF7	0
1320	713	timolol	9 µM	PC3	0
1321	699	griseofulvin	11 µM	MCF7	0
1322	656	cefaclor	10 µM	MCF7	0
1323	634	dinoprost	8 µM	HL60	0
1324	692	lumicolchicine	10 µM	PC3	0
1325	1014	PF-00539745-00	10 µM	MCF7	0
1326	663	co-dergocrine mesilate	6 µM	MCF7	0
1327	685	finasteride	11 µM	MCF7	0
1328	731	(+)-chelidonine	11 µM	PC3	0
1329	733	streptomycin	3 µM	PC3	0
1330	687	CP-320650-01	10 µM	MCF7	0
1331	746	cefuroxime	9 µM	MCF7	0
1332	677	viomycin	5 µM	MCF7	0
1333	757	trifluoperazine	10 µM	MCF7	0
1334	762	ribavirin	16 µM	PC3	0
1335	752	metoprolol	6 µM	MCF7	0
1336	713	biperiden	11 µM	PC3	0
1337	712	guanabenz	14 µM	PC3	0
1338	647	ambroxol	10 µM	MCF7	0
1339	1015	sirolimus	100 nM	PC3	0
1340	691	tiaprofenic acid	15 µM	MCF7	0
1341	727	haloperidol	10 µM	PC3	0
1342	691	tenoxicam	12 µM	MCF7	0
1343	720	paroxetine	1 µM	MCF7	0
1344	672	levobunolol	12 µM	MCF7	0
1345	632	khellin	15 µM	MCF7	0
1346	677	iopanoic acid	7 µM	MCF7	0
1347	741	lymecycline	7 µM	MCF7	0
1348	729	chlorprothixene	11 µM	MCF7	0
1349	765	fluphenazine	10 µM	MCF7	0
1350	725	tanespimycin	1 µM	MCF7	0
1351	706	hydrochlorothiazide	13 µM	MCF7	0
1352	713	testosterone	12 µM	PC3	0
1353	656	rifampicin	5 µM	MCF7	0
1354	725	sirolimus	100 nM	MCF7	0
1355	611	midecamycin	5 µM	PC3	0
1356	755	pipemidic acid	13 µM	MCF7	0
1357	681	nefopam	14 µM	PC3	0
1358	754	nomegestrol	11 µM	PC3	0
1359	761	thiamphenicol	11 µM	PC3	0
1360	767	clozapine	10 µM	MCF7	0
1361	702	bendroflumethiazide	9 µM	PC3	0
1362	671	doxycycline	8 µM	MCF7	0
1363	642	orphenadrine	13 µM	MCF7	0
1364	617	aceclofenac	11 µM	PC3	0
1365	704	beclometasone	8 µM	PC3	0
1366	737	pivampicillin	9 µM	MCF7	0
1367	726	pirenperone	10 µM	MCF7	0
1368	1055	pioglitazone	10 µM	MCF7	0
1369	616	spironolactone	10 µM	PC3	0
1370	673	bemegride	26 µM	MCF7	0
1371	619	telenzepine	9 µM	HL60	0
1372	637	pentoxifylline	14 µM	MCF7	0
1373	632	tolnaftate	13 µM	MCF7	0
1374	743	carbinoxamine	10 µM	MCF7	0
1375	617	mafenide	18 µM	PC3	0
1376	656	tiaprofenic acid	15 µM	MCF7	0
1377	757	troglitazone	10 µM	MCF7	0
1378	685	benzamil	11 µM	MCF7	0
1379	610	trimethobenzamide	9 µM	PC3	0
1380	725	estradiol	10 nM	MCF7	0
1381	709	methyldopate	15 µM	PC3	0
1382	642	fenbufen	16 µM	MCF7	0
1383	629	betazole	27 µM	HL60	0
1384	725	wortmannin	10 nM	MCF7	0
1385	1061	SC-560	10 µM	MCF7	0
1386	688	memantine	19 µM	PC3	0
1387	602	genistein	10 µM	HL60	0
1388	753	oxybenzone	18 µM	PC3	0
1389	691	tolmetin	13 µM	MCF7	0
1390	735	coralyne	10 µM	MCF7	0
1391	771	clemastine	9 µM	MCF7	0
1392	704	ciclosporin	3 µM	PC3	0
1393	737	lobelanidine	11 µM	MCF7	0
1394	686	promazine	12 µM	MCF7	0
1395	647	maprotiline	13 µM	MCF7	0
1396	610	hydrochlorothiazide	13 µM	PC3	0
1397	743	cefoxitin	9 µM	MCF7	0
1398	727	sirolimus	100 nM	PC3	0
1399	686	dicoumarol	12 µM	MCF7	0
1400	693	(+/-)-catechin	14 µM	PC3	0
1401	766	dihydroergocristine	6 µM	MCF7	0
1402	623	adenosine phosphate	11 µM	HL60	0
1403	704	terconazole	8 µM	PC3	0
1404	713	clofazimine	8 µM	PC3	0
1405	743	tetryzoline	17 µM	MCF7	0
1406	654	naringenin	15 µM	MCF7	0
1407	691	cefadroxil	11 µM	MCF7	0
1408	617	meclofenamic acid	12 µM	PC3	0
1409	623	dobutamine	12 µM	HL60	0
1410	633	lynestrenol	14 µM	MCF7	0
1411	1073	AH-6809	1 µM	PC3	0
1412	642	dantrolene	12 µM	MCF7	0
1413	603	sirolimus	100 nM	PC3	0
1414	685	betonicine	25 µM	MCF7	0
1415	728	clonidine	15 µM	PC3	0
1416	641	monocrotaline	12 µM	HL60	0
1417	505	sirolimus	100 nM	MCF7	0
1418	107	nocodazole	1 µM	MCF7	0
1419	762	netilmicin	3 µM	PC3	0
1420	101	monastrol	100 µM	MCF7	0
1421	632	isoxsuprine	12 µM	MCF7	0
1422	644	dydrogesterone	13 µM	HL60	0
1423	755	etynodiol	10 µM	MCF7	0
1424	745	ciprofibrate	14 µM	MCF7	0
1425	707	diloxanide	12 µM	MCF7	0
1426	751	finasteride	11 µM	MCF7	0
1427	680	isocarboxazid	17 µM	PC3	0
1428	1068	SB-203580	1 µM	MCF7	0
1429	714	paclitaxel	5 µM	PC3	0
1430	732	sulfamethizole	15 µM	PC3	0
1431	654	amantadine	10 µM	MCF7	0
1432	719	sulindac	11 µM	PC3	0
1433	618	griseofulvin	11 µM	HL60	0
1434	676	benzathine benzylpenicillin	4 µM	MCF7	0
1435	622	antazoline	13 µM	HL60	0
1436	712	vanoxerine	8 µM	PC3	0
1437	736	S-propranolol	14 µM	MCF7	0
1438	754	Prestwick-1083	9 µM	PC3	0
1439	648	leflunomide	15 µM	HL60	0
1440	736	flavoxate	9 µM	MCF7	0
1441	689	Prestwick-691	14 µM	PC3	0
1442	698	calcium folinate	8 µM	PC3	0
1443	691	betulinic acid	9 µM	MCF7	0
1444	687	alpha-ergocryptine	7 µM	MCF7	0
1445	747	albendazole	15 µM	MCF7	0
1446	702	dicoumarol	12 µM	PC3	0
1447	713	aciclovir	18 µM	PC3	0
1448	616	pindolol	16 µM	PC3	0
1449	514	demecolcine	12 µM	MCF7	0
1450	745	etanidazole	19 µM	MCF7	0
1451	738	isoflupredone	10 µM	MCF7	0
1452	748	leflunomide	15 µM	MCF7	0
1453	771	fenofibrate	11 µM	MCF7	0
1454	616	cefotaxime	8 µM	PC3	0
1455	749	methanthelinium bromide	10 µM	HL60	0
1456	504	tretinoin	1 µM	MCF7	0
1457	1055	SB-203580	1 µM	MCF7	0
1458	743	ribostamycin	7 µM	MCF7	0
1459	1092	16-phenyltetranorprostaglandin E2	10 µM	MCF7	0
1460	630	suloctidil	12 µM	HL60	0
1461	713	clozapine	12 µM	PC3	0
1462	737	ornidazole	18 µM	MCF7	0
1463	736	piribedil	12 µM	MCF7	0
1464	58	W-13	10 µM	MCF7	0
1465	758	digoxigenin	10 µM	MCF7	0
1466	691	carbenoxolone	7 µM	MCF7	0
1467	709	lovastatin	10 µM	PC3	0
1468	728	metoprolol	6 µM	PC3	0
1469	610	amprolium	13 µM	PC3	0
1470	1093	IC-86621	1 µM	PC3	0
1471	44	sodium phenylbutyrate	1 mM	HL60	0
1472	764	nocodazole	13 µM	PC3	0
1473	94	bucladesine	20 µM	MCF7	0
1474	648	podophyllotoxin	10 µM	HL60	0
1475	772	spaglumic acid	13 µM	MCF7	0
1476	741	lincomycin	9 µM	MCF7	0
1477	653	naftidrofuryl	8 µM	MCF7	0
1478	623	colchicine	10 µM	HL60	0
1479	31	sodium phenylbutyrate	100 µM	MCF7	0
1480	1087	BCB000038	10 µM	PC3	0
1481	513	valproic acid	500 µM	MCF7	0
1482	758	thioperamide	10 µM	MCF7	0
1483	672	furazolidone	18 µM	MCF7	0
1484	627	sulfadiazine	16 µM	MCF7	0
1485	741	lansoprazole	11 µM	MCF7	0
1486	757	clozapine	10 µM	MCF7	0
1487	613	paclitaxel	5 µM	HL60	0
1488	1093	16-phenyltetranorprostaglandin E2	10 µM	PC3	0
1489	622	vinpocetine	11 µM	HL60	0
1490	752	phenazopyridine	16 µM	MCF7	0
1491	702	sulfadimidine	13 µM	PC3	0
1492	744	altizide	10 µM	MCF7	0
1493	704	piromidic acid	14 µM	PC3	0
1494	633	verapamil	8 µM	MCF7	0
1495	1081	fulvestrant	1 µM	PC3	0
1496	513	valproic acid	50 µM	MCF7	0
1497	617	etodolac	14 µM	PC3	0
1498	695	tolazoline	20 µM	MCF7	0
1499	682	helveticoside	7 µM	PC3	0
1500	661	Prestwick-981	11 µM	HL60	0
1501	654	digitoxigenin	11 µM	MCF7	0
1502	691	alprostadil	11 µM	MCF7	0
1503	650	LY-294002	10 µM	HL60	0
1504	713	thioperamide	10 µM	PC3	0
1505	662	folic acid	9 µM	MCF7	0
1506	692	galantamine	11 µM	PC3	0
1507	611	verapamil	8 µM	PC3	0
1508	611	moroxydine	19 µM	PC3	0
1509	664	zardaverine	15 µM	HL60	0
1510	610	pyrimethamine	16 µM	PC3	0
1511	626	fulvestrant	10 nM	MCF7	0
1512	647	ascorbic acid	22 µM	MCF7	0
1513	504	5253409	17 µM	MCF7	0
1514	637	metampicillin	10 µM	MCF7	0
1515	749	saquinavir	5 µM	HL60	0
1516	678	ondansetron	12 µM	MCF7	0
1517	610	metronidazole	23 µM	PC3	0
1518	752	altizide	10 µM	MCF7	0
1519	112	W-13	10 µM	MCF7	0
1520	700	etiocholanolone	14 µM	MCF7	0
1521	1015	PF-00539745-00	10 µM	PC3	0
1522	656	tetramisole	17 µM	MCF7	0
1523	764	mebeverine	9 µM	PC3	0
1524	673	propranolol	14 µM	MCF7	0
1525	746	alpha-yohimbine	10 µM	MCF7	0
1526	727	valproic acid	500 µM	PC3	0
1527	1062	fulvestrant	1 µM	PC3	0
1528	726	lorglumide	8 µM	MCF7	0
1529	715	adenosine phosphate	11 µM	PC3	0
1530	767	troglitazone	10 µM	MCF7	0
1531	641	isocorydine	12 µM	HL60	0
1532	671	carbinoxamine	10 µM	MCF7	0
1533	660	nimodipine	10 µM	HL60	0
1534	640	scoulerine	12 µM	HL60	0
1535	753	metitepine	8 µM	PC3	0
1536	657	clorsulon	11 µM	MCF7	0
1537	738	flumequine	15 µM	MCF7	0
1538	706	harmaline	14 µM	MCF7	0
1539	627	amitriptyline	13 µM	MCF7	0
1540	735	arecoline	17 µM	MCF7	0
1541	640	dihydroergocristine	6 µM	HL60	0
1542	680	atractyloside	5 µM	PC3	0
1543	755	desoxycortone	12 µM	MCF7	0
1544	676	gabexate	10 µM	MCF7	0
1545	661	proxymetacaine	12 µM	HL60	0
1546	706	lovastatin	10 µM	MCF7	0
1547	735	cefoperazone	6 µM	MCF7	0
1548	732	ifosfamide	15 µM	PC3	0
1549	673	thioperamide	10 µM	MCF7	0
1550	745	cytisine	21 µM	MCF7	0
1551	649	flumetasone	10 µM	HL60	0
1552	1091	11-deoxy-16,16-dimethylprostaglandin E2	10 µM	PC3	0
1553	656	tolazamide	13 µM	MCF7	0
1554	648	hexestrol	15 µM	HL60	0
1555	1093	BCB000038	10 µM	PC3	0
1556	654	7-aminocephalosporanic acid	15 µM	MCF7	0
1557	761	hydroflumethiazide	12 µM	PC3	0
1558	680	levomepromazine	9 µM	PC3	0
1559	1059	PF-00562151-00	10 µM	MCF7	0
1560	602	monorden	100 nM	HL60	0
1561	648	terazosin	9 µM	HL60	0
1562	730	pilocarpine	15 µM	MCF7	0
1563	712	dehydrocholic acid	10 µM	PC3	0
1564	748	gabapentin	23 µM	MCF7	0
1565	655	hexetidine	12 µM	MCF7	0
1566	636	pindolol	16 µM	MCF7	0
1567	727	sirolimus	100 nM	PC3	0
1568	714	amikacin	7 µM	PC3	0
1569	660	altretamine	19 µM	HL60	0
1570	700	nefopam	14 µM	MCF7	0
1571	630	androsterone	14 µM	HL60	0
1572	753	cefoperazone	6 µM	PC3	0
1573	641	vinburnine	14 µM	HL60	0
1574	678	piretanide	11 µM	MCF7	0
1575	680	merbromin	5 µM	PC3	0
1576	695	zuclopenthixol	9 µM	MCF7	0
1577	767	wortmannin	10 nM	MCF7	0
1578	688	Prestwick-864	35 µM	PC3	0
1579	730	fluoxetine	12 µM	MCF7	0
1580	1087	IC-86621	1 µM	PC3	0
1581	611	cyproheptadine	12 µM	PC3	0
1582	642	mebendazole	14 µM	MCF7	0
1583	1067	colforsin	500 nM	PC3	0
1584	738	metampicillin	10 µM	MCF7	0
1585	1061	trichostatin A	1 µM	MCF7	0
1586	619	flavoxate	9 µM	HL60	0
1587	771	telenzepine	9 µM	MCF7	0
1588	733	tomatidine	10 µM	PC3	0
1589	111	paclitaxel	100 nM	MCF7	0
1590	755	butyl hydroxybenzoate	21 µM	MCF7	0
1591	613	moroxydine	19 µM	HL60	0
1592	635	nifuroxazide	15 µM	HL60	0
1593	112	colchicine	100 nM	MCF7	0
1594	659	thioperamide	10 µM	HL60	0
1595	640	mometasone	8 µM	HL60	0
1596	602	alpha-estradiol	10 nM	HL60	0
1597	661	remoxipride	10 µM	HL60	0
1598	618	riluzole	15 µM	HL60	0
1599	734	ramifenazone	14 µM	PC3	0
1600	653	suloctidil	12 µM	MCF7	0
1601	733	streptozocin	15 µM	PC3	0
1602	504	ikarugamycin	2 µM	MCF7	0
1603	618	sulfamethoxazole	16 µM	HL60	0
1604	641	(+)-chelidonine	11 µM	HL60	0
1605	33	valproic acid	500 µM	MCF7	0
1606	726	timolol	9 µM	MCF7	0
1607	731	butacaine	13 µM	PC3	0
1608	772	trapidil	19 µM	MCF7	0
1609	707	lisuride	12 µM	MCF7	0
1610	765	troglitazone	10 µM	MCF7	0
1611	761	alfadolone	10 µM	PC3	0
1612	660	rolipram	15 µM	HL60	0
1613	750	genistein	10 µM	HL60	0
1614	90	splitomicin	20 µM	PC3	0
1615	682	dantrolene	12 µM	PC3	0
1616	673	(+)-isoprenaline	11 µM	MCF7	0
1617	737	mafenide	18 µM	MCF7	0
1618	718	ceftazidime	6 µM	PC3	0
1619	706	retrorsine	11 µM	MCF7	0
1620	1067	SB-202190	1 µM	PC3	0
1621	681	myosmine	27 µM	PC3	0
1622	662	syrosingopine	6 µM	MCF7	0
1623	719	carbamazepine	17 µM	PC3	0
1624	748	quipazine	9 µM	MCF7	0
1625	686	vincamine	11 µM	MCF7	0
1626	764	alprenolol	14 µM	PC3	0
1627	702	piperacillin	7 µM	PC3	0
1628	613	erythromycin	5 µM	HL60	0
1629	673	propofol	22 µM	MCF7	0
1630	735	ascorbic acid	22 µM	MCF7	0
1631	28	diclofenac	10 µM	MCF7	0
1632	678	oxedrine	24 µM	MCF7	0
1633	658	benzthiazide	9 µM	HL60	0
1634	750	monorden	100 nM	HL60	0
1635	686	phentolamine	13 µM	MCF7	0
1636	644	Prestwick-682	6 µM	HL60	0
1637	16	celecoxib	10 µM	MCF7	0
1638	506	troglitazone	10 µM	MCF7	0
1639	664	etilefrine	18 µM	HL60	0
1640	614	neomycin	4 µM	HL60	0
1641	706	fursultiamine	9 µM	MCF7	0
1642	612	ticlopidine	13 µM	HL60	0
1643	631	N-acetylmuramic acid	14 µM	HL60	0
1644	692	colistin	3 µM	PC3	0
1645	657	dirithromycin	5 µM	MCF7	0
1646	648	nadide	6 µM	HL60	0
1647	694	pregnenolone	13 µM	MCF7	0
1648	688	nafcillin	9 µM	PC3	0
1649	709	arcaine	15 µM	PC3	0
1650	746	naltrexone	10 µM	MCF7	0
1651	747	podophyllotoxin	10 µM	MCF7	0
1652	693	emetine	7 µM	PC3	0
1653	704	pentamidine	7 µM	PC3	0
1654	745	tranexamic acid	25 µM	MCF7	0
1655	771	pergolide	10 µM	MCF7	0
1656	685	phenformin	17 µM	MCF7	0
1657	735	clebopride	8 µM	MCF7	0
1658	1081	BCB000040	10 µM	PC3	0
1659	513	fulvestrant	10 nM	MCF7	0
1660	733	suxibuzone	9 µM	PC3	0
1661	687	Prestwick-1100	9 µM	MCF7	0
1662	767	genistein	10 µM	MCF7	0
1663	699	levomepromazine	9 µM	MCF7	0
1664	619	isotretinoin	13 µM	HL60	0
1665	640	clorsulon	11 µM	HL60	0
1666	771	prednisolone	11 µM	MCF7	0
1667	725	fluphenazine	10 µM	MCF7	0
1668	741	tiletamine	15 µM	MCF7	0
1669	1016	PF-01378883-00	10 µM	MCF7	0
1670	691	solanine	5 µM	MCF7	0
1671	748	alimemazine	5 µM	MCF7	0
1672	704	diphemanil metilsulfate	10 µM	PC3	0
1673	1007	PF-00539745-00	10 µM	PC3	0
1674	631	carcinine	22 µM	HL60	0
1675	685	diphenylpyraline	13 µM	MCF7	0
1676	743	pyrithyldione	24 µM	MCF7	0
1677	755	meglumine	20 µM	MCF7	0
1678	623	debrisoquine	9 µM	HL60	0
1679	758	butyl hydroxybenzoate	21 µM	MCF7	0
1680	671	dienestrol	15 µM	MCF7	0
1681	671	cefoxitin	9 µM	MCF7	0
1682	633	cotinine	23 µM	MCF7	0
1683	758	aciclovir	18 µM	MCF7	0
1684	1095	CP-863187	10 µM	PC3	0
1685	631	carteolol	12 µM	HL60	0
1686	735	nitrendipine	11 µM	MCF7	0
1687	602	LY-294002	10 µM	HL60	0
1688	677	piribedil	12 µM	MCF7	0
1689	615	oxolinic acid	15 µM	HL60	0
1690	750	tanespimycin	1 µM	HL60	0
1691	1047	PHA-00767505E	10 µM	MCF7	0
1692	746	ondansetron	12 µM	MCF7	0
1693	756	nabumetone	18 µM	MCF7	0
1694	673	profenamine	11 µM	MCF7	0
1695	704	iocetamic acid	7 µM	PC3	0
1696	690	fluticasone	8 µM	MCF7	0
1697	1003	PF-00562151-00	10 µM	PC3	0
1698	744	zomepirac	13 µM	MCF7	0
1699	690	etofenamate	11 µM	MCF7	0
1700	623	ambroxol	10 µM	HL60	0
1701	715	digoxin	5 µM	PC3	0
1702	650	sirolimus	100 nM	HL60	0
1703	743	butirosin	5 µM	MCF7	0
1704	662	dipivefrine	10 µM	MCF7	0
1705	676	fluvoxamine	9 µM	MCF7	0
1706	704	tetramisole	17 µM	PC3	0
1707	602	tanespimycin	1 µM	HL60	0
1708	613	metanephrine	17 µM	HL60	0
1709	761	naftifine	12 µM	PC3	0
1710	619	doxepin	13 µM	HL60	0
1711	602	tanespimycin	1 µM	HL60	0
1712	602	LY-294002	10 µM	HL60	0
1713	688	gramine	23 µM	PC3	0
1714	618	proglumide	12 µM	HL60	0
1715	755	nilutamide	13 µM	MCF7	0
1716	1027	erastin	20 µM	PC3	0
1717	728	labetalol	11 µM	PC3	0
1718	671	iopromide	5 µM	MCF7	0
1719	655	iohexol	5 µM	MCF7	0
1720	693	phenazone	21 µM	PC3	0
1721	632	levodopa	20 µM	MCF7	0
1722	744	metoprolol	6 µM	MCF7	0
1723	758	latamoxef	7 µM	MCF7	0
1724	686	metamizole sodium	12 µM	MCF7	0
1725	715	ioversol	5 µM	PC3	0
1726	718	metformin	24 µM	PC3	0
1727	648	delsoline	9 µM	HL60	0
1728	726	3-hydroxy-DL-kynurenine	18 µM	MCF7	0
1729	660	tonzonium bromide	7 µM	HL60	0
1730	1031	AG-013608	10 µM	PC3	0
1731	631	carisoprodol	15 µM	HL60	0
1732	661	adipiodone	4 µM	HL60	0
1733	632	sulfaguanidine	19 µM	MCF7	0
1734	680	sulfadimethoxine	13 µM	PC3	0
1735	736	ranitidine	11 µM	MCF7	0
1736	700	meclofenoxate	14 µM	MCF7	0
1737	719	phensuximide	21 µM	PC3	0
1738	661	flucloxacillin	8 µM	HL60	0
1739	622	diperodon	9 µM	HL60	0
1740	654	N-acetylmuramic acid	14 µM	MCF7	0
1741	719	cyclic adenosine monophosphate	12 µM	PC3	0
1742	738	scoulerine	12 µM	MCF7	0
1743	745	physostigmine	6 µM	MCF7	0
1744	632	diphemanil metilsulfate	10 µM	MCF7	0
1745	502	depudecin	1 µM	MCF7	0
1746	26b	sirolimus	100 nM	MCF7	0
1747	693	carcinine	22 µM	PC3	0
1748	771	chenodeoxycholic acid	10 µM	MCF7	0
1749	693	cyclobenzaprine	13 µM	PC3	0
1750	766	aceclofenac	11 µM	MCF7	0
1751	691	decamethonium bromide	10 µM	MCF7	0
1752	756	ribavirin	16 µM	MCF7	0
1753	764	sulfapyridine	16 µM	PC3	0
1754	633	midecamycin	5 µM	MCF7	0
1755	612	sulfaguanidine	19 µM	HL60	0
1756	737	pizotifen	9 µM	MCF7	0
1757	619	difenidol	12 µM	HL60	0
1758	687	pramocaine	12 µM	MCF7	0
1759	681	phenformin	17 µM	PC3	0
1760	731	tetrahydroalstonine	11 µM	PC3	0
1761	1092	CP-944629	10 µM	MCF7	0
1762	733	nalbuphine	10 µM	PC3	0
1763	631	cefixime	9 µM	HL60	0
1764	641	cinchonidine	14 µM	HL60	0
1765	730	(-)-atenolol	15 µM	MCF7	0
1766	637	gemfibrozil	16 µM	MCF7	0
1767	645	pempidine	13 µM	HL60	0
1768	729	moroxydine	19 µM	MCF7	0
1769	687	phenelzine	17 µM	MCF7	0
1770	120	colforsin	50 µM	HL60	0
1771	729	fluvastatin	9 µM	MCF7	0
1772	645	pramocaine	12 µM	HL60	0
1773	683	CP-320650-01	10 µM	PC3	0
1774	663	salsolinol	15 µM	MCF7	0
1775	690	pronetalol	15 µM	MCF7	0
1776	632	pheniramine	11 µM	MCF7	0
1777	701	myosmine	27 µM	PC3	0
1778	647	clofazimine	8 µM	MCF7	0
1779	631	N-acetyl-L-aspartic acid	23 µM	HL60	0
1780	622	trichostatin A	100 nM	HL60	0
1781	653	cefalexin	11 µM	MCF7	0
1782	732	hydroquinine	9 µM	PC3	0
1783	725	alpha-estradiol	10 nM	MCF7	0
1784	683	diethylstilbestrol	15 µM	PC3	0
1785	767	LY-294002	10 µM	MCF7	0
1786	629	metrifonate	16 µM	HL60	0
1787	709	harpagoside	8 µM	PC3	0
1788	660	butyl hydroxybenzoate	21 µM	HL60	0
1789	685	sulfamethoxypyridazine	14 µM	MCF7	0
1790	688	pronetalol	15 µM	PC3	0
1791	733	strophanthidin	10 µM	PC3	0
1792	656	colistin	3 µM	MCF7	0
1793	753	clebopride	8 µM	PC3	0
1794	767	tanespimycin	1 µM	MCF7	0
1795	654	dl-alpha tocopherol	9 µM	MCF7	0
1796	635	betahistine	17 µM	HL60	0
1797	686	fludrocortisone	9 µM	MCF7	0
1798	711	vincamine	11 µM	MCF7	0
1799	660	florfenicol	11 µM	HL60	0
1800	671	pridinol	10 µM	MCF7	0
1801	650	fulvestrant	1 µM	HL60	0
1802	682	lanatoside C	4 µM	PC3	0
1803	1023	F0447-0125	10 µM	PC3	0
1804	746	bupropion	14 µM	MCF7	0
1805	657	raubasine	10 µM	MCF7	0
1806	726	cotinine	23 µM	MCF7	0
1807	757	valproic acid	500 µM	MCF7	0
1808	629	sulfadiazine	16 µM	HL60	0
1809	713	probucol	8 µM	PC3	0
1810	694	scopolamine	12 µM	MCF7	0
1811	692	hydroxyachillin	14 µM	PC3	0
1812	627	hydroflumethiazide	12 µM	MCF7	0
1813	741	diphenhydramine	14 µM	MCF7	0
1814	730	N6-methyladenosine	14 µM	MCF7	0
1815	677	proguanil	14 µM	MCF7	0
1816	671	sulfamonomethoxine	14 µM	MCF7	0
1817	702	ethoxyquin	18 µM	PC3	0
1818	671	cefapirin	9 µM	MCF7	0
1819	735	pralidoxime	23 µM	MCF7	0
1820	741	ketorolac	11 µM	MCF7	0
1821	653	mimosine	20 µM	MCF7	0
1822	693	SR-95531	11 µM	PC3	0
1823	733	triamcinolone	10 µM	PC3	0
1824	602	estradiol	100 nM	HL60	0
1825	751	chlorcyclizine	12 µM	MCF7	0
1826	737	torasemide	11 µM	MCF7	0
1827	615	pyrantel	11 µM	HL60	0
1828	656	pyrazinamide	32 µM	MCF7	0
1829	26b	monorden	100 nM	MCF7	0
1830	619	nortriptyline	13 µM	HL60	0
1831	698	merbromin	5 µM	PC3	0
1832	671	ifosfamide	15 µM	MCF7	0
1833	750	nordihydroguaiaretic acid	1 µM	HL60	0
1834	733	podophyllotoxin	10 µM	PC3	0
1835	751	trichostatin A	100 nM	MCF7	0
1836	686	indapamide	11 µM	MCF7	0
1837	633	azacyclonol	15 µM	MCF7	0
1838	619	niflumic acid	14 µM	HL60	0
1839	712	crotamiton	20 µM	PC3	0
1840	506	sirolimus	100 nM	MCF7	0
1841	1083	meteneprost	10 µM	PC3	0
1842	640	raubasine	10 µM	HL60	0
1843	614	isoniazid	29 µM	HL60	0
1844	715	cefotiam	7 µM	PC3	0
1845	737	indometacin	11 µM	MCF7	0
1846	71	troglitazone	10 µM	SKMEL5	0
1847	646	fendiline	11 µM	MCF7	0
1848	705	prednisone	11 µM	MCF7	0
1849	758	haloperidol	11 µM	MCF7	0
1850	743	drofenine	11 µM	MCF7	0
1851	681	hydralazine	20 µM	PC3	0
1852	644	diflorasone	8 µM	HL60	0
1853	633	danazol	12 µM	MCF7	0
1854	632	idoxuridine	11 µM	MCF7	0
1855	646	quinidine	11 µM	MCF7	0
1856	671	azlocillin	8 µM	MCF7	0
1857	655	cefotiam	7 µM	MCF7	0
1858	731	meprylcaine	15 µM	PC3	0
1859	645	fludroxycortide	9 µM	HL60	0
1860	646	alprenolol	14 µM	MCF7	0
1861	636	nocodazole	13 µM	MCF7	0
1862	692	mebhydrolin	5 µM	PC3	0
1863	649	thiamazole	35 µM	HL60	0
1864	658	mestranol	13 µM	HL60	0
1865	656	salsolidin	16 µM	MCF7	0
1866	688	trihexyphenidyl	12 µM	PC3	0
1867	645	foliosidine	13 µM	HL60	0
1868	653	ketoconazole	8 µM	MCF7	0
1869	758	methyldopa	19 µM	MCF7	0
1870	750	sirolimus	100 nM	HL60	0
1871	602	sirolimus	100 nM	HL60	0
1872	615	pentetrazol	29 µM	HL60	0
1873	648	ricinine	24 µM	HL60	0
1874	627	thiamphenicol	11 µM	MCF7	0
1875	632	ticlopidine	13 µM	MCF7	0
1876	671	amrinone	21 µM	MCF7	0
1877	644	vitexin	9 µM	HL60	0
1878	720	CP-320650-01	10 µM	MCF7	0
1879	755	prasterone	12 µM	MCF7	0
1880	73	SC-58125	10 µM	SKMEL5	0
1881	772	triflupromazine	10 µM	MCF7	0
1882	702	dantrolene	12 µM	PC3	0
1883	764	cefapirin	9 µM	PC3	0
1884	720	thiamazole	35 µM	MCF7	0
1885	505	carbamazepine	100 nM	MCF7	0
1886	630	bezafibrate	11 µM	HL60	0
1887	758	meclozine	9 µM	MCF7	0
1888	750	estradiol	10 nM	HL60	0
1889	728	oxyphenbutazone	12 µM	PC3	0
1890	619	lincomycin	9 µM	HL60	0
1891	646	fluphenazine	8 µM	MCF7	0
1892	737	chlorpromazine	11 µM	MCF7	0
1893	649	cefazolin	8 µM	HL60	0
1894	1009	AG-013608	10 µM	PC3	0
1895	754	alverine	8 µM	PC3	0
1896	644	palmatine	10 µM	HL60	0
1897	709	harmaline	14 µM	PC3	0
1898	656	vancomycin	3 µM	MCF7	0
1899	660	etynodiol	10 µM	HL60	0
1900	658	nafcillin	9 µM	HL60	0
1901	660	megestrol	10 µM	HL60	0
1902	701	etiocholanolone	14 µM	PC3	0
1903	693	theophylline	20 µM	PC3	0
1904	659	propofol	22 µM	HL60	0
1905	750	trichostatin A	100 nM	HL60	0
1906	612	pheniramine	11 µM	HL60	0
1907	612	hydrochlorothiazide	13 µM	HL60	0
1908	715	zaprinast	15 µM	PC3	0
1909	1	metformin	10 µM	MCF7	0
1910	725	rosiglitazone	10 µM	MCF7	0
1911	602	valproic acid	500 µM	HL60	0
1912	766	clorsulon	11 µM	MCF7	0
1913	614	naltrexone	10 µM	HL60	0
1914	663	sulfabenzamide	14 µM	MCF7	0
1915	747	fendiline	11 µM	MCF7	0
1916	613	loxapine	9 µM	HL60	0
1917	656	methoxamine	16 µM	MCF7	0
1918	758	serotonin	19 µM	MCF7	0
1919	656	probenecid	14 µM	MCF7	0
1920	619	dropropizine	17 µM	HL60	0
1921	720	beta-escin	3 µM	MCF7	0
1922	690	oxamniquine	14 µM	MCF7	0
1923	689	diflorasone	8 µM	PC3	0
1924	602	sirolimus	100 nM	HL60	0
1925	727	LY-294002	10 µM	PC3	0
1926	658	theophylline	20 µM	HL60	0
1927	614	pirenzepine	9 µM	HL60	0
1928	640	sulfasalazine	10 µM	HL60	0
1929	660	(-)-MK-801	12 µM	HL60	0
1930	690	canadine	12 µM	MCF7	0
1931	660	prasterone	12 µM	HL60	0
1932	726	thioperamide	10 µM	MCF7	0
1933	634	colecalciferol	10 µM	HL60	0
1934	715	fusidic acid	7 µM	PC3	0
1935	612	acebutolol	11 µM	HL60	0
1936	749	piretanide	11 µM	HL60	0
1937	694	idoxuridine	11 µM	MCF7	0
1938	614	cefotaxime	8 µM	HL60	0
1939	705	dicycloverine	12 µM	MCF7	0
1940	685	hydralazine	20 µM	MCF7	0
1941	656	orciprenaline	8 µM	MCF7	0
1942	680	nitrofurantoin	17 µM	PC3	0
1943	718	etofylline	18 µM	PC3	0
1944	756	isradipine	11 µM	MCF7	0
1945	632	thioridazine	10 µM	MCF7	0
1946	750	sirolimus	100 nM	HL60	0
1947	688	tolazamide	13 µM	PC3	0
1948	35	trichostatin A	100 nM	HL60	0
1949	681	prilocaine	16 µM	PC3	0
1950	700	flunixin	8 µM	MCF7	0
1951	748	nadide	6 µM	MCF7	0
1952	630	testosterone	12 µM	HL60	0
1953	623	methyldopa	19 µM	HL60	0
1954	634	felodipine	10 µM	HL60	0
1955	618	fludrocortisone	9 µM	HL60	0
1956	645	flunisolide	9 µM	HL60	0
1957	631	bacampicillin	8 µM	HL60	0
1958	633	cyproheptadine	12 µM	MCF7	0
1959	622	mifepristone	9 µM	HL60	0
1960	660	cantharidin	20 µM	HL60	0
1961	613	dehydrocholic acid	10 µM	HL60	0
1962	687	rifabutin	5 µM	MCF7	0
1963	736	iopanoic acid	7 µM	MCF7	0
1964	649	lithocholic acid	11 µM	HL60	0
1965	771	ifenprodil	8 µM	MCF7	0
1966	98	thalidomide	100 µM	MCF7	0
1967	758	pirenperone	10 µM	MCF7	0
1968	661	pirlindole	12 µM	HL60	0
1969	623	vanoxerine	8 µM	HL60	0
1970	650	LY-294002	10 µM	HL60	0
1971	735	carbimazole	21 µM	MCF7	0
1972	658	scopolamine	12 µM	HL60	0
1973	707	metixene	12 µM	MCF7	0
1974	702	ethisterone	13 µM	PC3	0
1975	1066	0316684-0000	10 µM	MCF7	0
1976	766	pergolide	10 µM	MCF7	0
1977	767	alpha-estradiol	10 nM	MCF7	0
1978	650	haloperidol	10 µM	HL60	0
1979	657	chloroquine	8 µM	MCF7	0
1980	750	geldanamycin	1 µM	HL60	0
1981	692	conessine	11 µM	PC3	0
1982	692	calcium pantothenate	8 µM	PC3	0
1983	731	cytisine	21 µM	PC3	0
1984	635	etifenin	12 µM	HL60	0
1985	720	trichostatin A	100 nM	MCF7	0
1986	70	novobiocin	100 µM	ssMCF7	0
1987	623	chlormezanone	15 µM	HL60	0
1988	649	isocarboxazid	17 µM	HL60	0
1989	613	lynestrenol	14 µM	HL60	0
1990	651	cefoxitin	9 µM	HL60	0
1991	757	sirolimus	100 nM	MCF7	0
1992	672	theobromine	22 µM	MCF7	0
1993	618	tiapride	11 µM	HL60	0
1994	619	norethisterone	13 µM	HL60	0
1995	618	trimethoprim	14 µM	HL60	0
1996	602	tanespimycin	1 µM	HL60	0
1997	752	etanidazole	19 µM	MCF7	0
1998	693	corynanthine	10 µM	PC3	0
[truncated: 4,102 more rows]

## Sheet: ST6
	Supplementary Table 6: Drug Resistance and Sensitivity in African Americans and European Americans with Lung Cancer
	AA Resistant Only n= 405	EA Sensitive Only n = 201	AA Resistant and EA Sensitive n = 53	Drug Type	Clinical Use	Therapeutic Application
	5140203	5109870	5194442	Small molecule	No	None
	5186324	5155877	zaprinast	Phosphodiesterase inhibitor	No	None
	meteneprost	5224221	fulvestrant	Selective estrogen receptor degrader	Yes	Used to treat HR+ metastatic breast cancer, and HR- advanced breast cancer in combination with palbociclib
	betulinic acid	5255229	ketoconazole	Anti-fungal agent	Yes	7/2013 FDA warning: Causes severe liver injuries
	rosiglitazone	5707885	benserazide	DOPA decarboxylase inhibitor	Yes	Parkinson's disease, Restless Legs Syndrome
	12,13-EODE	iobenguane	sirolimus (rapamycin)	Immunosuppressant	Yes	Organ transplant rejection
	adiphenine	apomorphine	progesterone	Hormone	Yes	Hormone replacement therapy
	3-acetamidocoumarin	mycophenolic acid	haloperidol	Antipsychotic	Yes	Schizophrenia, Tourette Syndrome
	dimethadione	budesonide	dobutamine	Sympathomimetic	Yes	Heart failure
	doxycycline	monobenzone	trichostatin A	Histone deacetylase inhibitor	No	None
	xamoterol	proxyphylline	tretinoin (ATRA)	Retinoid	Yes	Acne
	BCB000040	trifluoperazine	ampyrone	Anti-inflammatory agent	No	None
	riluzole	nilutamide	fluphenazine	Antipsychotic	Yes	Schizophrenia
	streptozocin	zuclopenthixol	dexamethasone	Corticosteroid	Yes	Various inflammatory conditions
	diethylcarbamazine	dexibuprofen	PF-01378883-00	Small molecule	No	None
	iloprost	PNU-0293363	hycanthone	Schistosomicide	Yes	Parasite diseases
	folic acid	etacrynic acid	genistein	Soy isoflavone		Chemoprevention
	topiramate	nisoxetine	lidocaine	Local anesthetic	Yes	Pain
	neostigmine bromide	imipramine	tropine	Alkaloid	No	None
	isoniazid	ellipticine	minoxidil	Vasodilator	Yes	Hair loss
	bambuterol	Prestwick-665	LY-294002	PI3K inhibitor	No	None
	ambroxol	homochlorcyclizine	ethotoin	Anticonvulsant	Yes	Epilepsy
	thiamphenicol	ebselen	diperodon	Local anesthetic	Yes	Skin abrasions, hemorrhoids
	harmol	lobelanidine	valproic acid	Anticonvulsant	Yes	Epilepsy, bipolar disorder
	ribavirin	benperidol	clorgiline	Monoamine oxidase inhibitor	Yes	Antidepressant
	ketotifen	hexestrol	dinoprostone	Prostaglandin	Yes	Labor
	atovaquone	ifenprodil	lithocholic acid	Detergent	No	None
	alprostadil	perphenazine	CP-690334-01	Histone deacetylase inhibitor	No	None
	minocycline	dioxybenzone	irinotecan	Topoisomerase 1 inhibitor	Yes	Cancer
	cefotaxime	harmine	gentamicin	Antibiotic	Yes	Bacterial infections
	parbendazole	sertaconazole	profenamine	Anticholinergic	Yes	Parkinson's disease
	troglitazone	tonzonium bromide	pioglitazone	Thiazolidinedione	Yes	Diabetes
	amylocaine	tranylcypromine	dydrogesterone	Hormone	Yes	Hormone replacement therapy
	bemegride	PHA-00665752	isotretinoin	Retinoid	Yes	Acne
	16-phenyltetranorprostaglandin E2	etofylline	monorden	Anti-fungal agent	Yes	Fungal infections
	estradiol	alexidine	0175029-0000	CDK inhibitor	No	None
	phentolamine	amiodarone	tanespimycin	Antibiotic	Yes	Bacterial infections
	staurosporine	miconazole	tomatidine	Anabolic steroid	No	None
	meclofenamic acid	prazosin	mifepristone	Progesterone inhibitor	Yes	End early pregnancy
	cefepime	astemizole	ramipril	ACE inhibitor	Yes	High blood pressure
	chloropyrazine	dicycloverine	3-hydroxy-DL-kynurenine	Tryptophan metabolite	No	None
	mimosine	PNU-0230031	spectinomycin	Antibiotic	Yes	Bacterial infections
	lidoflazine	tamoxifen	diphenhydramine	Antihistamine	Yes	Allergies
	Prestwick-682	bufexamac	sulfamethizole	Antibiotic	Yes	Bacterial infections
	halofantrine	primaquine	3-nitropropionic acid	Mitochondrial inhibitor	No	None
	thiethylperazine	xylometazoline	oxybutynin	Anticholinergic	Yes	Overactive bladder
	lycorine	propoxycaine	fluvastatin	Statin	Yes	High cholesterol
	succinylsulfathiazole	cicloheximide	CP-944629	Small molecule	No	None
	arachidonyltrifluoromethane	fludroxycortide	metaraminol	Sympathomimetic	Yes	Hypotension
	canadine	ronidazole	pentolonium	Nicotinic antagonist	Yes	Hypertension
	C-75	blebbistatin	testosterone	Hormone	Yes	Hormone replacement therapy
	naproxen	mefloquine	prednisolone	Steroid	Yes	Various inflammatory conditions
	fenbendazole	ionomycin	moxisylyte	Adrenergic antagonist	Yes	Erectile dysfunction
	streptomycin	simvastatin
	tetracycline	acepromazine
	Prestwick-1103	sulpiride
	butamben	resveratrol
	chlorpropamide	monensin
	naftidrofuryl	(+/-)-catechin
	DL-PPMP	cloperastine
	netilmicin	(+)-chelidonine
	cefotiam	colforsin
	ajmaline	thioridazine
	guanadrel	bezafibrate
	Gly-His-Lys	ethosuximide
	ceforanide	fenoprofen
	tinidazole	nocodazole
	decitabine	tyrphostin AG-825
	minaprine	verapamil
	acemetacin	dequalinium chloride
	bumetanide	nomifensine
	mepyramine	thioproperazine
	demecarium bromide	piperidolate
	Prestwick-675	bromperidol
	lisuride	fluorometholone
	fusidic acid	beclometasone
	metronidazole	abamectin
	calycanthine	vidarabine
	bisoprolol	parthenolide
	etiocholanolone	geldanamycin
	captopril	nicardipine
	mesalazine	scriptaid
	Prestwick-642	pimozide
	sulfafurazole	colchicine
	esculin	prochlorperazine
	myricetin	equilin
	acetohexamide	pirenzepine
	benzylpenicillin	bromocriptine
	diethylstilbestrol	allantoin
	strophanthidin	bupivacaine
	biperiden	methacholine chloride
	nalbuphine	deptropine
	sulfaguanidine	probenecid
	convolamine	6-azathymine
	benzbromarone	rolitetracycline
	carteolol	clofilium tosylate
	tolbutamide	STOCK1N-35215
	pentoxifylline	methotrexate
	Prestwick-1082	alprenolol
	karakoline	ketanserin
	15(S)-15-methylprostaglandin E2	phenazopyridine
	diclofenamide	Y-27632
	16,16-dimethylprostaglandin E2	alvespimycin
	sulfadimethoxine	quercetin
	mephentermine	ozagrel
	methyldopate	trioxysalen
	exisulind	alclometasone
	pyrithyldione	0179445-0000
	phenazone	flavoxate
	enoxacin	betonicine
	calcium folinate	bepridil
	R-atenolol	trifluridine
	mefexamide	deferoxamine
	pizotifen	ivermectin
	paclitaxel	econazole
	dizocilpine	tracazolate
	cyclopentolate	saquinavir
	azathioprine	velnacrine
	mebeverine	dirithromycin
	sulfacetamide	felodipine
	acetazolamide	zalcitabine
	dantrolene	PHA-00816795
	piperacillin	diphenylpyraline
	atracurium besilate	gossypol
	selegiline	chrysin
	11-deoxy-16,16-dimethylprostaglandin E2	quinostatin
	flucloxacillin	natamycin
	aminoglutethimide	hydrocortisone
	naringenin	fusaric acid
	trapidil	glafenine
	yohimbic acid	15-delta prostaglandin J2
	lomefloxacin	8-azaguanine
	pivmecillinam	chlorcyclizine
	triprolidine	CP-645525-01
	piretanide	vorinostat
	fursultiamine	sulfametoxydiazine
	rotenone	amodiaquine
	levobunolol	promethazine
	mafenide	chlorpromazine
	AR-A014418	fluoxetine
	diflunisal	clobetasol
	bicuculline	danazol
	lansoprazole	seneciphylline
	MK-886	azacyclonol
	CP-863187	piperacetazine
	Prestwick-983	nicergoline
	guanabenz	cyproterone
	metrizamide	calmidazolium
	N-acetyl-L-aspartic acid	metergoline
	cimetidine	0297417-0002B
	Prestwick-692	clioquinol
	arcaine	piperlongumine
	acebutolol	promazine
	fenofibrate	clomipramine
	felbinac	nortriptyline
	sulfamonomethoxine	loperamide
	fluticasone	quinisocaine
	dimenhydrinate	ciclopirox
	novobiocin	HC toxin
	diclofenac	metyrapone
	pergolide	cetirizine
	triamcinolone	clomifene
	pancuronium bromide	benzamil
	enalapril	nifedipine
	praziquantel	norcyclobenzaprine
	antazoline	etoposide
	cotinine	levomepromazine
	tacrine	amoxapine
	leflunomide	norethisterone
	guaifenesin	dexverapamil
	bretylium tosilate	disulfiram
	clemastine	menadione
	finasteride	terfenadine
	vinpocetine	emetine
	brompheniramine	thiostrepton
	ethionamide	cyproheptadine
	PHA-00745360	anisomycin
	ticlopidine	oxyphenbutazone
	domperidone	0173570-0000
	CP-319743	flumetasone
	metoprolol	propafenone
	estrone	PNU-0251126
	terazosin	chlorprothixene
	citalopram	daunorubicin
	0317956-0000	puromycin
	foliosidine	trimipramine
	tranexamic acid	nifuroxazide
	proguanil	withaferin A
	memantine	mepacrine
	racecadotril	niclosamide
	Prestwick-1080	prenylamine
	ciprofloxacin	fluspirilene
	tolnaftate	STOCK1N-35696
	khellin	rifabutin
	indapamide	alimemazine
	vitexin	protriptyline
	gallamine triethiodide	MS-275
	monastrol	pyrvinium
	amantadine	phenoxybenzamine
	metanephrine	chloropyramine
	lumicolchicine	MG-262
	isoxsuprine
	ergocalciferol
	0316684-0000
	hydrochlorothiazide
	nialamide
	wortmannin
	sulindac sulfide
	orciprenaline
	cefixime
	tolfenamic acid
	atractyloside
	terbutaline
	PHA-00846566E
	glipizide
	tetrahydroalstonine
	fludrocortisone
	sulindac
	rofecoxib
	trimethobenzamide
	tacrolimus
	ciprofibrate
	PHA-00767505E
	chlormezanone
	tetracaine
	pheniramine
	amprolium
	Chicago Sky Blue 6B
	metformin
	cinchonine
	molsidomine
	midodrine
	levodopa
	clebopride
	bacitracin
	aciclovir
	heptaminol
	moroxydine
	raloxifene
	carbamazepine
	vinburnine
	cloxacillin
	nomegestrol
	erythromycin
	isoetarine
	disopyramide
	mecamylamine
	thiamazole
	dilazep
	PHA-00851261E
	indoprofen
	AH-6809
	butirosin
	diphemanil metilsulfate
	cefoperazone
	cefazolin
	iopamidol
	monocrotaline
	cefadroxil
	ketoprofen
	carisoprodol
	sulfachlorpyridazine
	vigabatrin
	levopropoxyphene
	cefamandole
	spiradoline
	cytisine
	josamycin
	triamterene
	gabapentin
	telenzepine
	propofol
	vincamine
	hexylcaine
	tetryzoline
	loracarbef
	citiolone
	carbenoxolone
	hydroxyachillin
	meropenem
	camptothecin
	6-bromoindirubin-3'-oxime
	harpagoside
	hymecromone
	metoclopramide
	isocarboxazid
	dihydrostreptomycin
	iproniazid
	zardaverine
	carbarsone
	serotonin
	salsolinol
	timolol
	paromomycin
	cefalexin
	clozapine
	melatonin
	hydroflumethiazide
	SR-95639A
	etanidazole
	orphenadrine
	sulfaphenazole
	CP-320650-01
	thioperamide
	trimetazidine
	merbromin
	etilefrine
	edrophonium chloride
	cinnarizine
	Prestwick-984
	0198306-0000
	nitrendipine
	dropropizine
	Prestwick-967
	lactobionic acid
	ritodrine
	sulfapyridine
	1,5-isoquinolinediol
	iopanoic acid
	chlortalidone
	flumequine
	(+)-isoprenaline
	harman
	cefalonium
	chlorogenic acid
	dyclonine
	furosemide
	nizatidine
	tropicamide
	fluorocurarine
	cefoxitin
	piromidic acid
	Prestwick-857
	brinzolamide
	tridihexethyl
	isometheptene
	hecogenin
	mexiletine
	propylthiouracil
	heliotrine
	ginkgolide A
	SC-58125
	rifampicin
	bergenin
	sodium phenylbutyrate
	acenocoumarol
	fasudil
	N6-methyladenosine
	gliquidone
	guanfacine
	sulfaquinoxaline
	diprophylline
	Prestwick-864
	mestranol
	benzocaine
	ondansetron
	probucol
	pheneticillin
	amikacin
	trihexyphenidyl
	viomycin
	tetramisole
	tetraethylenepentamine
	4-hydroxyphenazone
	oxantel
	dl-alpha tocopherol
	pimethixene
	proglumide
	etifenin
	oxetacaine
	acetylsalicylsalicylic acid
	desipramine
	chenodeoxycholic acid
	cobalt chloride
	hydrocotarnine
	vancomycin
	sulfabenzamide
	nystatin
	noscapine
	pyridoxine
	Prestwick-691
	myosmine
	pindolol
	H-89
	scopolamine N-oxide
	propranolol
	chlorphenamine
	amitriptyline
	zidovudine
	L-methionine sulfoximine
	homatropine
	mianserin
	dihydroergocristine
	atropine oxide
	pinacidil
	troleandomycin
	quinpirole
	isoxicam
	spironolactone
	lanatoside C
	thiamine
	clotrimazole
	etidronic acid
	helveticoside
	iocetamic acid

## Sheet: ST7
	Supplementary Table 7. Differentially Expressed Genes in Lung Tissues from African Americans
	Probe ID	Gene Symbol	Fold Change AA/EA Tumor Tissues	P	Fold Change AA/EA Normal Tissues	P
	205048_s_at	PSPHL	5.35424	0.000289718	11.0828	7.0201e-06
	202203_s_at	AMFR	4.06385	0.000983438	4.3143	0.00325127
	1554663_a_at	NUMA1	5.73585	0.00256028	3.27538	0.00827637
	210790_s_at	SAR1A	2.24362	0.0211026	2.79758	0.0123282
	1557051_s_at	HOTAIRM1	1.89085	0.0122592	2.42903	0.000169689
	1555643_s_at	LILRA5	1.94122	0.00896152	2.24976	0.0251452
	204324_s_at	GOLIM4	1.88051	0.011944	2.22154	0.000339647
	202895_s_at	SIRPA	2.03199	0.0399914	2.10655	0.00671894
	201262_s_at	BGN	2.70347	0.00886885	2.06746	0.0234142
	210219_at	SP100	2.29434	0.00917896	2.026	0.0151223
	212777_at	SOS1	2.62844	0.000214844	1.86558	0.00504264
	1557430_at	SMIM17	1.82168	0.0119432	1.82809	0.00151393
	206777_s_at	CRYBB2	2.26876	0.00255284	1.81658	0.0025069
	224979_s_at	USP36	2.3388	0.00241834	1.76856	0.00322909
	244485_at	HLA-DPB1	2.15406	0.0137393	1.72189	0.0320411
	228642_at	HOTAIRM1	1.57904	0.0402008	1.71041	0.000331583
	210317_s_at	YWHAE	1.74331	0.0371705	1.70084	0.0244779
	234472_at	GALNT13	1.6763	0.0427793	1.67825	0.0413258
	227548_at	ORMDL1	1.60206	0.00521398	1.66538	0.00501177
	1568949_at	PITPNC1	1.84385	0.0142623	1.61651	0.021919
	1554810_at	PLA2G4C	1.68351	0.00053142	1.58804	0.034537
	233677_at	---	1.8024	0.0339963	1.56296	0.0171084
	202204_s_at	AMFR	1.56836	0.00411764	1.55512	0.000585095
	201246_s_at	OTUB1	1.7254	0.044694	1.54392	0.0404918
	232716_at	---	-1.73667	0.00501047	-1.50388	0.00558828
	228469_at	---	-1.87585	0.00449004	-1.51875	0.00349344
	240176_at	RP11-803D5.4	-1.55643	0.0237203	-1.5207	0.0285011
	1568720_at	ZNF506	-1.73542	0.00708764	-1.52081	0.0317036
	204359_at	FLRT2	-1.91192	0.0247053	-1.52181	0.0377788
	1569180_at	---	-1.5065	0.0196187	-1.544	0.00212899
	233020_at	---	-1.51752	0.0216748	-1.55793	0.00480099
	227446_s_at	DHRS4-AS1	-2.2109	0.000150386	-1.56214	0.00137576
	238774_at	---	-1.75732	0.00100538	-1.56807	0.0261129
	229028_s_at	ARL17A /// ARL17B	-1.55634	0.0270176	-1.56953	0.0279871
	204340_at	TMEM187	-1.59774	0.0360373	-1.57029	0.0278206
	205728_at	TENM1	-2.89894	0.0204639	-1.59461	0.0480406
	227657_at	RNF150	-1.83951	0.00738377	-1.60567	0.0157011
	226192_at	AR	-2.79948	0.030851	-1.62235	0.0184743
	232382_s_at	PCMTD1	-2.2716	0.00131363	-1.63386	0.00162426
	229024_at	RNF150	-1.86182	0.0306722	-1.64423	0.0024519
	1555144_at	ARL17A /// ARL17B	-2.06061	0.00496001	-1.67868	0.0123698
	226884_at	LRRN1	-3.00046	0.0239222	-1.69078	0.0414492
	206088_at	LRRC37A3	-1.7013	0.0456177	-1.69612	0.0128488
	242080_at	---	-1.60982	0.0267929	-1.70741	0.0203514
	243589_at	KANSL1	-1.79491	0.00302506	-1.80622	0.00783297
	236963_at	---	-2.15825	0.0110729	-1.83458	0.00372398
	237189_at	HOXB-AS1	-1.88123	0.01169	-1.83656	0.0134134
	229307_at	ANKRD28	-1.80148	0.0297175	-1.84532	0.00726117
	243218_at	---	-1.98495	0.000666009	-1.86177	0.00109687
	233519_at	---	-1.86466	0.000557338	-1.90739	0.00475695
	1565913_at	---	-1.74122	0.0441492	-1.92361	0.0133405
	1557077_a_at	CTA-390C10.10	-2.61905	0.000104149	-2.01191	0.00500532
	1558430_at	RP11-680G24.5	-1.74562	0.00708224	-2.23301	0.0100154
	210718_s_at	ARL17A /// ARL17B	-3.16326	0.000296317	-2.62667	0.000595475
	224490_s_at	LOC100294341 /// LOC101929774	-3.0473	4.07165e-05	-3.23457	9.89267e-05
	224489_at	LOC100294341 /// LOC101929774	-3.84107	1.71172e-05	-3.68898	0.000247475
	238900_at	HLA-DRB1 /// HLA-DRB3 /// HLA-DRB4 /// HLA-DRB5	-4.80715	0.0288034	-6.61227	0.0251058

## Sheet: ST8
	Supplementary Table 8. Differentially Expressed microRNAs in Lung Cancers from African Americans and European Americans
	AA T vs AA N	Fold Change = ≥2 and ≤-2	p-value with FDR = < 0.01
	Column ID	p-value(Tissue Type)	p-value(Batch)	p-value(Tumor vs. Normal)	MeanRatio(Tumor vs. Normal)	FoldChange(Tumor vs. Normal)	FoldChange(Tumor vs. Normal) (Description)	F(Tissue Type)	SS(Tissue Type)	F(Batch)	SS(Batch)	SS(Error)	F(Error)
	hsa-miR-126	1.76674e-17	1	1.76674e-17	0.326368	-3.06402	Tumor down vs Normal	126.044	6318810000	1.04916e-28	3.68176e-20	3609500000	1
	hsa-miR-30b	3.25482e-16	1	3.25482e-16	0.442939	-2.25764	Tumor down vs Normal	110.766	371798000	1.85183e-28	4.3511e-21	241676000	1
	hsa-miR-145	1.07296e-10	1	1.07296e-10	0.452626	-2.20933	Tumor down vs Normal	56.9525	41358700	1.15185e-28	5.8553e-22	52286100	1
	hsa-miR-96	4.80002e-10	1	4.80002e-10	4.42062	4.42062	Tumor up vs Normal	51.7839	7814090	2.91562e-29	3.07973e-23	10864700	1
	hsa-miR-30d	8.98129e-10	1	8.98129e-10	0.46019	-2.17301	Tumor down vs Normal	49.6868	6740910	1.76505e-28	1.67622e-22	9768100	1
	hsa-miR-193b	1.29281e-09	1	1.29281e-09	3.90703	3.90703	Tumor up vs Normal	48.4846	349826	7.20624e-29	3.63961e-24	519494	1
	hsa-miR-30a	1.6188e-08	1	1.6188e-08	0.391787	-2.55241	Tumor down vs Normal	40.479	101851000	8.43337e-29	1.48538e-21	181163000	1
	hsa-miR-21	5.47447e-08	1	5.47447e-08	4.91602	4.91602	Tumor up vs Normal	36.8225	28606700000	5.96112e-29	3.24175e-19	55935300000	1
	hsa-miR-183	4.6511e-07	1	4.6511e-07	3.61878	3.61878	Tumor up vs Normal	30.7065	126492	2.09576e-29	6.04326e-25	296595	1
	hsa-miR-106b	1.66198e-06	1	1.66198e-06	2.11361	2.11361	Tumor up vs Normal	27.2448	1872790	3.50625e-29	1.68713e-23	4949240	1
	hsa-miR-451	3.71757e-06	1	3.71757e-06	0.293434	-3.40792	Tumor down vs Normal	25.1232	1625620000	8.8404e-29	4.00419e-20	4658830000	1
	hsa-miR-218	6.20766e-06	1	6.20766e-06	0.425879	-2.34809	Tumor down vs Normal	23.7987	160911	1.35694e-28	6.42229e-24	486817	1
	hsa-miR-135b	1.77077e-05	1	1.77077e-05	3.06152	3.06152	Tumor up vs Normal	21.1546	608493	4.75015e-29	9.56437e-24	2071020	1
	hsa-miR-142-5p	2.60912e-05	1	2.60912e-05	2.46407	2.46407	Tumor up vs Normal	20.1984	1093750	1.47201e-29	5.57971e-24	3898830	1
	hsa-miR-141	3.86784e-05	1	3.86784e-05	2.25592	2.25592	Tumor up vs Normal	19.2391	3646430	2.67546e-29	3.5496e-23	13646300	1
	hsa-miR-199a-3p+hsa-miR-199b-3p	7.35245e-05	1	7.35245e-05	2.27007	2.27007	Tumor up vs Normal	17.6994	52711300	1.11415e-28	2.32266e-21	214427000	1
	hsa-miR-429	0.000115095	1	0.000115095	3.06107	3.06107	Tumor up vs Normal	16.6439	111831	2.81774e-29	1.32527e-24	483768	1
	hsa-miR-200a	0.000182682	1	0.000182682	2.27769	2.27769	Tumor up vs Normal	15.572	2637010	9.85781e-30	1.16854e-23	12192700	1
	hsa-miR-200b	0.000310983	1	0.000310983	2.04592	2.04592	Tumor up vs Normal	14.3582	7621310	2.69056e-29	9.99703e-23	38217600	1
	hsa-miR-155	0.00125963	1	0.00125963	2.53152	2.53152	Tumor up vs Normal	11.2723	130317	8.79099e-30	7.11421e-25	832383	1
	hsa-miR-1975	0.00164496	1	0.00164496	3.32847	3.32847	Tumor up vs Normal	10.7013	445029	1.55407e-29	4.52398e-24	2994220	1
	hsa-miR-376a	0.00174064	1	0.00174064	3.36227	3.36227	Tumor up vs Normal	10.5811	95990	3.66733e-29	2.32885e-24	653172	1
	hsa-miR-199a-5p	0.00286258	1	0.00286258	2.39766	2.39766	Tumor up vs Normal	9.53501	2145180	6.62121e-29	1.04274e-22	16198500	1
	hsa-miR-301a	0.00297926	1	0.00297926	3.02623	3.02623	Tumor up vs Normal	9.4519	240679	8.79873e-30	1.56833e-24	1833370	1
	hsa-miR-377	0.00311619	1	0.00311619	3.77085	3.77085	Tumor up vs Normal	9.35859	99162.4	8.29898e-30	6.15545e-25	762903	1
	EA T vs EA N	Fold Change = ≥2 and ≤-2	p-value with FDR = < 0.01
	Column ID	p-value(Tissue Type)	p-value(Batch)	p-value(Tumor vs. Normal)	MeanRatio(Tumor vs. Normal)	FoldChange(Tumor vs. Normal)	FoldChange(Tumor vs. Normal) (Description)	F(Tissue Type)	SS(Tissue Type)	F(Batch)	SS(Batch)	SS(Error)	F(Error)
	hsa-miR-126	5.47605e-23	1	5.47605e-23	0.32201	-3.10549	Tumor down vs Normal	165.279	6644940000	2.66769e-28	7.50772e-20	4060650000	1
	hsa-miR-30a	7.47011e-20	1	7.47011e-20	0.376238	-2.65789	Tumor down vs Normal	130.029	105746000	1.2547e-29	7.1427e-23	82138100	1
	hsa-miR-1979	1.71632e-15	1	1.71632e-15	2.78522	2.78522	Tumor up vs Normal	88.7028	1314510	6.27206e-29	6.50629e-24	1496740	1
	hsa-miR-218	8.78837e-14	1	8.78837e-14	0.356957	-2.80145	Tumor down vs Normal	74.6387	306504	5.51046e-30	1.58401e-25	414757	1
	hsa-miR-21	1.11182e-13	1	1.11182e-13	3.45377	3.45377	Tumor up vs Normal	73.8331	23109900000	2.11218e-28	4.6278e-19	31613200000	1
	hsa-miR-145	2.17978e-12	1	2.17978e-12	0.497103	-2.01166	Tumor down vs Normal	63.9615	63941400	7.85156e-30	5.49436e-23	100968000	1
	hsa-miR-1260	1.6672e-11	1	1.6672e-11	2.84514	2.84514	Tumor up vs Normal	57.5464	53428300	9.42384e-30	6.12461e-23	93772200	1
	hsa-miR-96	1.2768e-10	1	1.2768e-10	4.27504	4.27504	Tumor up vs Normal	51.3874	9872660	4.64692e-29	6.24944e-23	19404300	1
	hsa-miR-155	1.27685e-10	1	1.27685e-10	2.11705	2.11705	Tumor up vs Normal	51.3873	116715	3.62745e-28	5.76726e-24	229399	1
	hsa-miR-142-5p	8.63136e-10	1	8.63136e-10	2.2125	2.2125	Tumor up vs Normal	45.8345	1375700	2.38832e-29	5.0179e-24	3031460	1
	hsa-miR-183	2.02543e-09	1	2.02543e-09	4.02791	4.02791	Tumor up vs Normal	43.4257	243046	1.64045e-29	6.42692e-25	565280	1
	hsa-miR-1274b	7.92674e-09	1	7.92674e-09	2.76597	2.76597	Tumor up vs Normal	39.6599	63822400	1.18653e-28	1.33659e-21	162534000	1
	hsa-miR-193b	1.4924e-08	1	1.4924e-08	2.85023	2.85023	Tumor up vs Normal	37.9496	253920	1.88346e-29	8.82155e-25	675790	1
	hsa-miR-451	2.18952e-08	1	2.18952e-08	0.219812	-4.54934	Tumor down vs Normal	36.9245	3110270000	4.20882e-29	2.48166e-20	8507560000	1
	hsa-miR-141	2.19137e-08	1	2.19137e-08	2.45147	2.45147	Tumor up vs Normal	36.9222	6939300	1.2327e-29	1.62174e-23	18982300	1
	hsa-miR-142-3p	6.40746e-08	1	6.40746e-08	2.09027	2.09027	Tumor up vs Normal	34.0964	192878000	9.7783e-29	3.872e-21	571341000	1
	hsa-miR-200c	1.35022e-07	1	1.35022e-07	2.40201	2.40201	Tumor up vs Normal	32.1707	41212800	1.76002e-29	1.5783e-22	129388000	1
	hsa-miR-720	1.65327e-07	1	1.65327e-07	2.52133	2.52133	Tumor up vs Normal	31.6528	51532800000	1.69167e-28	1.9279e-18	164434000000	1
	hsa-miR-1274a	2.87629e-07	1	2.87629e-07	3.28292	3.28292	Tumor up vs Normal	30.2481	87956600	5.23177e-30	1.06492e-22	293692000	1
	hsa-miR-1	1.28985e-06	1	1.28985e-06	0.456243	-2.19182	Tumor down vs Normal	26.525	34384.1	1.30511e-29	1.18426e-25	130925	1
	hsa-miR-144	9.40693e-05	1	9.40693e-05	0.415354	-2.40759	Tumor down vs Normal	16.5509	6408740	1.38197e-30	3.74581e-24	39108500	1
	hsa-miR-1975	0.000112114	1	0.000112114	2.54717	2.54717	Tumor up vs Normal	16.1642	418758	1.83385e-30	3.32561e-25	2616560	1
	hsa-miR-135b	0.000298746	1	0.000298746	4.76091	4.76091	Tumor up vs Normal	14.0358	1560330	2.71325e-30	2.11138e-24	11227900	1
	hsa-miR-375	0.000613081	1	0.000613081	4.07588	4.07588	Tumor up vs Normal	12.5097	9190780	1.17113e-29	6.02298e-23	74204200	1
	hsa-miR-376a	0.000800937	1	0.000800937	2.11067	2.11067	Tumor up vs Normal	11.95	34624.9	6.1718e-30	1.25179e-25	292645	1
	hsa-miR-200a	0.00154574	1	0.00154574	2.32092	2.32092	Tumor up vs Normal	10.592	4317630	4.73774e-30	1.35188e-23	41170800	1
	hsa-miR-200b	0.00165961	1	0.00165961	2.53867	2.53867	Tumor up vs Normal	10.4468	24328900	2.19359e-30	3.57596e-23	235213000	1
	hsa-miR-377	0.00362719	1	0.00362719	2.25147	2.25147	Tumor up vs Normal	8.87153	45030	8.10924e-31	2.88125e-26	512654	1
						AA Only	Both AA and EA	EA Only
						hsa-miR-30b	hsa-miR-126	hsa-miR-1979
						hsa-miR-30d	hsa-miR-145	hsa-miR-1260
						hsa-miR-106b	hsa-miR-96	hsa-miR-1274b
						hsa-miR-199a-3p+hsa-miR-199b-3p	hsa-miR-193b	hsa-miR-142-3p
						hsa-miR-429	hsa-miR-30a	hsa-miR-200c
						hsa-miR-199a-5p	hsa-miR-21	hsa-miR-720
						hsa-miR-301a	hsa-miR-183	hsa-miR-1274a
							hsa-miR-451	hsa-miR-1
							hsa-miR-218	hsa-miR-144
							hsa-miR-135b	hsa-miR-375
							hsa-miR-142-5p
							hsa-miR-141
							hsa-miR-200a
							hsa-miR-200b
							hsa-miR-155
							hsa-miR-1975
							hsa-miR-376a
							hsa-miR-377

## Sheet: ST9
	Supplementary Table 9. Differentially Expressed microRNAs in Lung Tissues from African Americans
	AA T vs EA T	Fold Change = ≥1.5 and ≤-1.5	p-value = < 0.05
	Column ID	p-value(race)	p-value(Batch)	p-value(AA Tumors vs. EA Tumors)	MeanRatio(AA Tumors vs. EA Tumors)	FoldChange(AA Tumors vs. EA Tumors)	FoldChange(AA Tumors vs. EA Tumors) (Description)	F(race)	SS(race)	F(Batch)	SS(Batch)	SS(Error)	F(Error)
	hsa-miR-205	0.0148441	1	0.0148441	0.191572	-5.21996	AA Tumors down vs EA Tumors	6.17555	14356100	4.0008e-30	6.51036e-23	204570000	1
	hsa-miR-191	0.0226973	1	0.0226973	1.50327	1.50327	AA Tumors up vs EA Tumors	5.37894	414156	7.43789e-29	4.00881e-23	6775640	1
	AA N vs EA N	Fold Change = ≥1.5 and ≤-1.5	p-value = < 0.05
	Column ID	p-value(race)	p-value(Batch)	p-value(AA Normal vs. EA Normal)	MeanRatio(AA Normal vs. EA Normal)	FoldChange(AA Normal vs. EA Normal)	FoldChange(AA Normal vs. EA Normal) (Description)	F(race)	SS(race)	F(Batch)	SS(Batch)	SS(Error)	F(Error)
	hsa-let-7d	0.008347	1	0.008347	1.11165	1.11165	AA Normal up vs EA Normal	7.29439	668885	6.49785e-28	4.17091e-22	7794380	1
	hsa-miR-30a	0.0105803	1	0.0105803	1.18006	1.18006	AA Normal up vs EA Normal	6.83359	7368590	4.14122e-28	3.12581e-21	91654600	1
	hsa-miR-191	0.0155208	1	0.0155208	1.29576	1.29576	AA Normal up vs EA Normal	6.09963	70614.2	3.93652e-29	3.19006e-24	984028	1
	hsa-miR-34c-5p	0.0177697	1	0.0177697	0.597357	-1.67404	AA Normal down vs EA Normal	5.8438	38020.6	2.8413e-29	1.29401e-24	553023	1
	hsa-miR-151-3p	0.0312502	1	0.0312502	1.2412	1.2412	AA Normal up vs EA Normal	4.79688	1125.28	7.34122e-29	1.2055e-25	19939.7	1
	hsa-miR-1274b	0.0331813	1	0.0331813	1.43472	1.43472	AA Normal up vs EA Normal	4.68774	3234990	1.26196e-29	6.09609e-23	58658100	1
	hsa-miR-1274a	0.0341655	1	0.0341655	1.441	1.441	AA Normal up vs EA Normal	4.6347	2798690	6.94958e-29	2.93759e-22	51327800	1
	hsa-miR-1260	0.0353644	1	0.0353644	1.31521	1.31521	AA Normal up vs EA Normal	4.57223	1319190	5.88641e-29	1.18885e-22	24524300	1
	hsa-let-7e	0.0468837	1	0.0468837	1.10967	1.10967	AA Normal up vs EA Normal	4.06707	65241.6	2.47189e-28	2.77569e-23	1363520	1
	hsa-miR-107	0.049667	1	0.049667	1.1533	1.1533	AA Normal up vs EA Normal	3.96501	1052.71	7.42298e-28	1.37956e-24	22567.6	1
						AA T Only	Both	AA N Only
						hsa-miR-205	hsa-miR-191	hsa-let-7d
								hsa-miR-30a
								hsa-miR-34c-5p
								hsa-miR-151-3p
								hsa-miR-1274b
								hsa-miR-1274a
								hsa-miR-1260
								hsa-let-7e
								hsa-miR-107
